# Supplementary material
Source: PubMed Central journal article supplement (PMC9377832)

## Supporting Information

“Fluorogenic cyclopropenones for multi-component, real-time imaging”

Tyler K. Heiss,<sup>†</sup> Robert S. Dorn,<sup>†,∇</sup> Andrew. J. Ferreira,<sup>†,∇</sup> Anna C. Love,<sup>†</sup> and Jennifer A. Prescher<sup>\*,†,‡,§</sup>

<sup>†</sup>Departments of Chemistry, University of California, Irvine, California 92697, United States.

<sup>‡</sup>Molecular Biology & Biochemistry, University of California, Irvine, California 92697, United States.

<sup>§</sup>Pharmaceutical Sciences, University of California, Irvine, California 92697, United States.

<sup>∇</sup>R.S.D. and A.J.F. contributed equally to the work presented.

\*Correspondence should be addressed to [jpresche@uci.edu](mailto:jpresche@uci.edu)

## Contents

|                                 |     |
|---------------------------------|-----|
| <b>Supplementary Figures</b>    | S2  |
| <b>Supplementary Scheme S1</b>  | S2  |
| <b>Supplementary Figure S1</b>  | S3  |
| <b>Supplementary Figure S2</b>  | S4  |
| <b>Supplementary Figure S3</b>  | S5  |
| <b>Supplementary Scheme S2</b>  | S6  |
| <b>Supplementary Figure S4</b>  | S7  |
| <b>Supplementary Figure S5</b>  | S8  |
| <b>Supplementary Figure S6</b>  | S8  |
| <b>Supplementary Table S1</b>   | S9  |
| <b>Supplementary Figure S7</b>  | S10 |
| <b>Supplementary Figure S8</b>  | S10 |
| <b>Supplementary Figure S9</b>  | S11 |
| <b>Supplementary Figure S10</b> | S12 |
| <b>Supplementary Figure S11</b> | S13 |

|                          |     |
|--------------------------|-----|
| Supplementary Figure S12 | S14 |
| Supplementary Figure S13 | S15 |
| General information      | S15 |
| Synthetic procedures     | S20 |
| NMR spectra              | S36 |

## Supplementary Figures

**Scheme S1.** Synthesis of CpO probes **1a-1c**. <sup>a</sup>Insertion was performed at 110 °C for 2 d

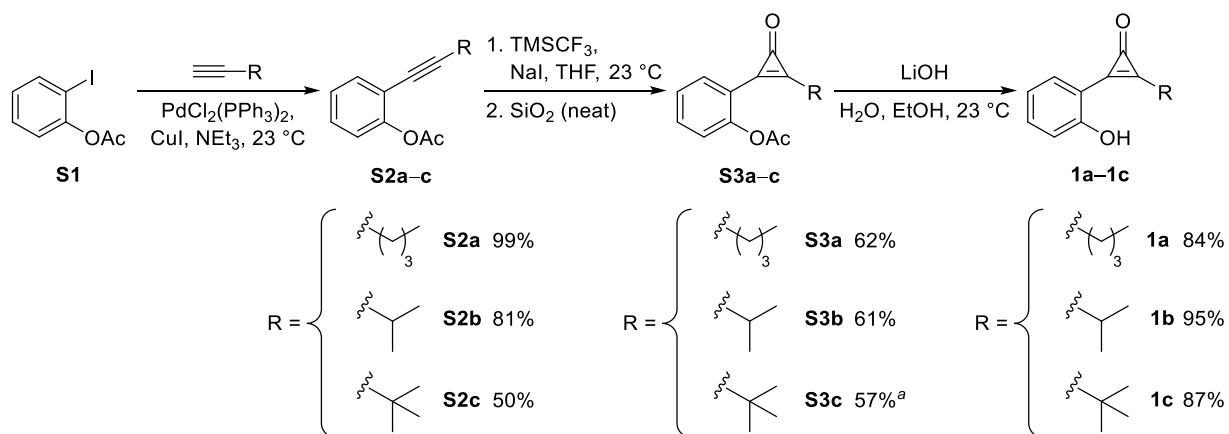

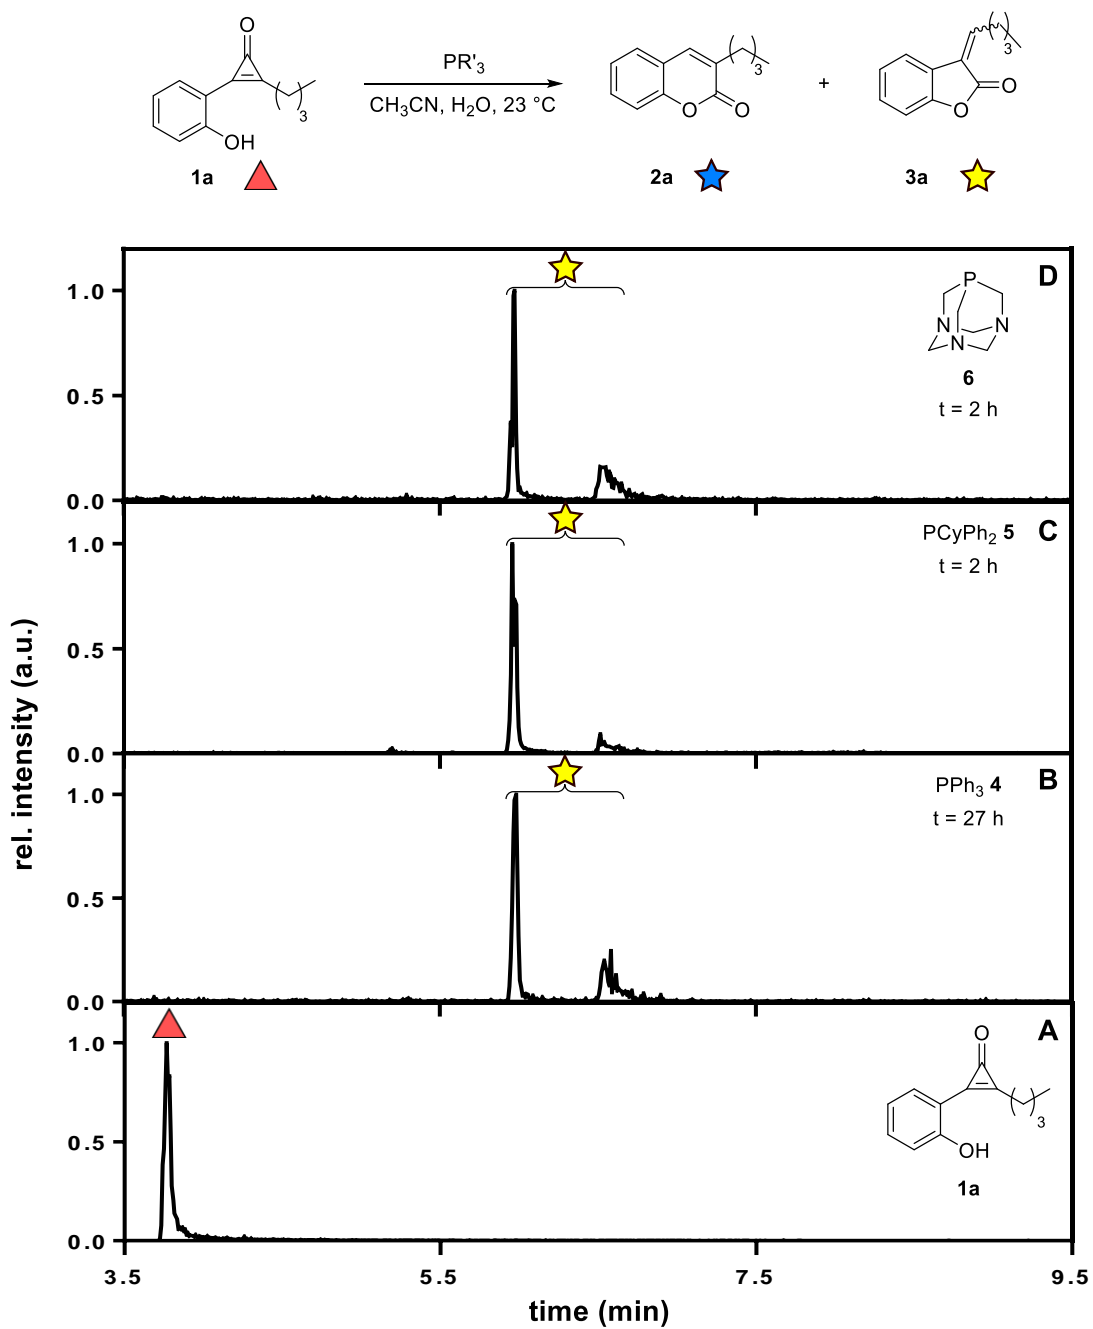

**Figure S1.** CpO **1a** reacts with phosphines **4**–**6** to afford the undesired product **3a**. Reaction progress was monitored using LC-MS (EIC,  $m/z$  203). (A) CpO **1a** standard. (B)–(D) Reaction between CpO **1a** and (B)  $PPh_3$  (**4**), (C)  $PCyPh_2$  (**5**) or (D) phosphine **6**.

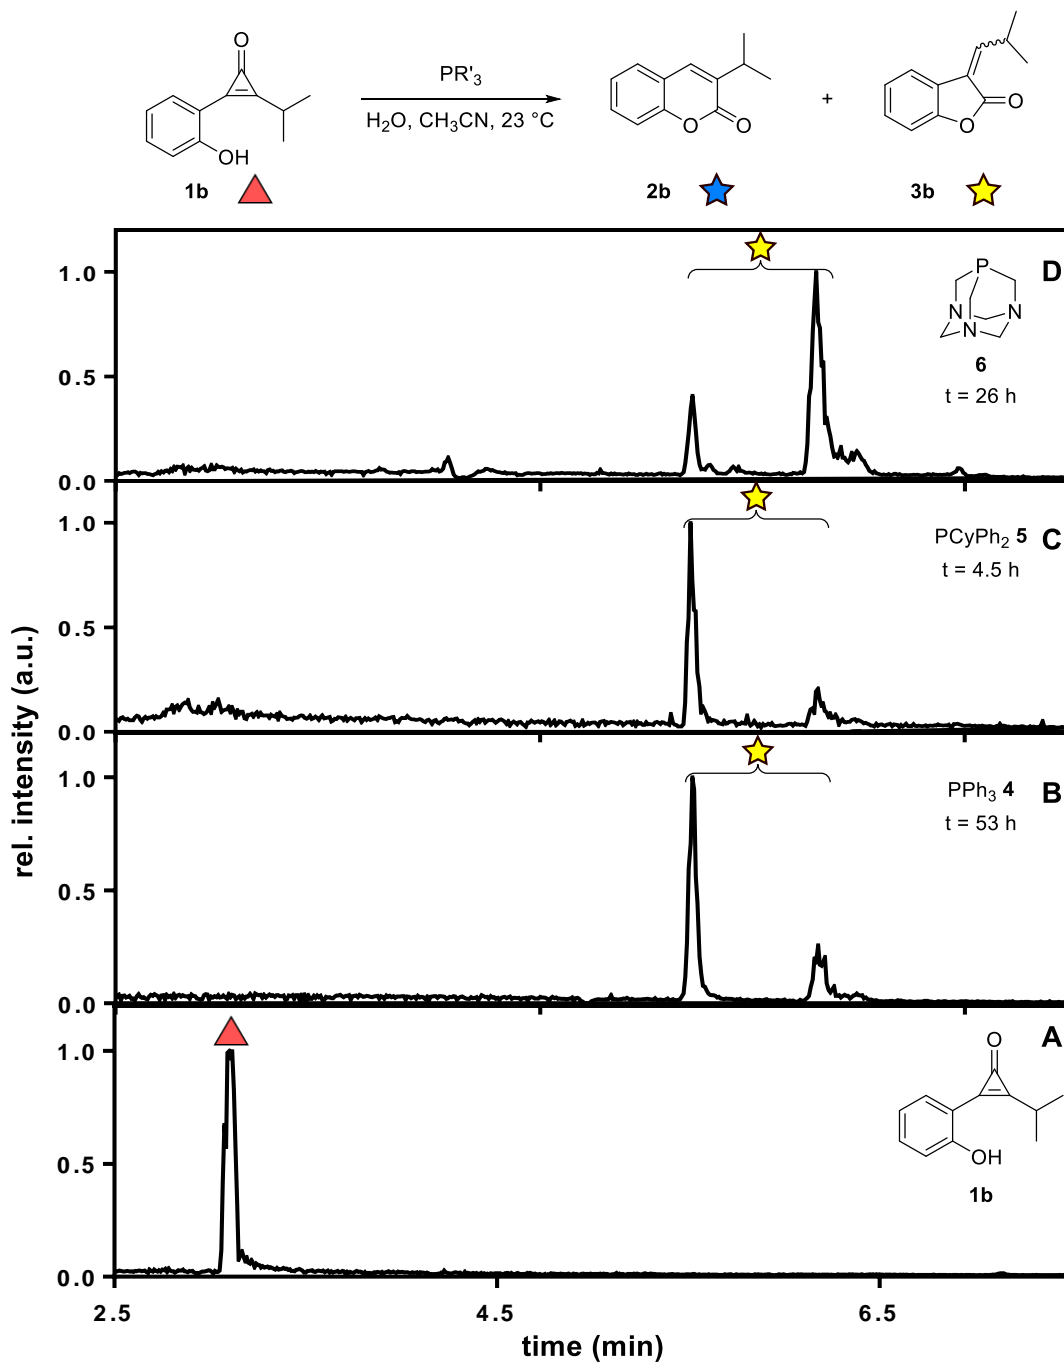

**Figure S2.** CpO **1b** reacts with phosphines **4**–**6** to afford the undesired product **3b**. Reaction progress was monitored using LC-MS (EIC,  $m/z$  203). (A) CpO **1b** standard. (B)–(D) Reaction between CpO **1b** and (B)  $\text{PPh}_3$  (**4**), (C)  $\text{PCyPh}_2$  (**5**) or (D) phosphine **6**.

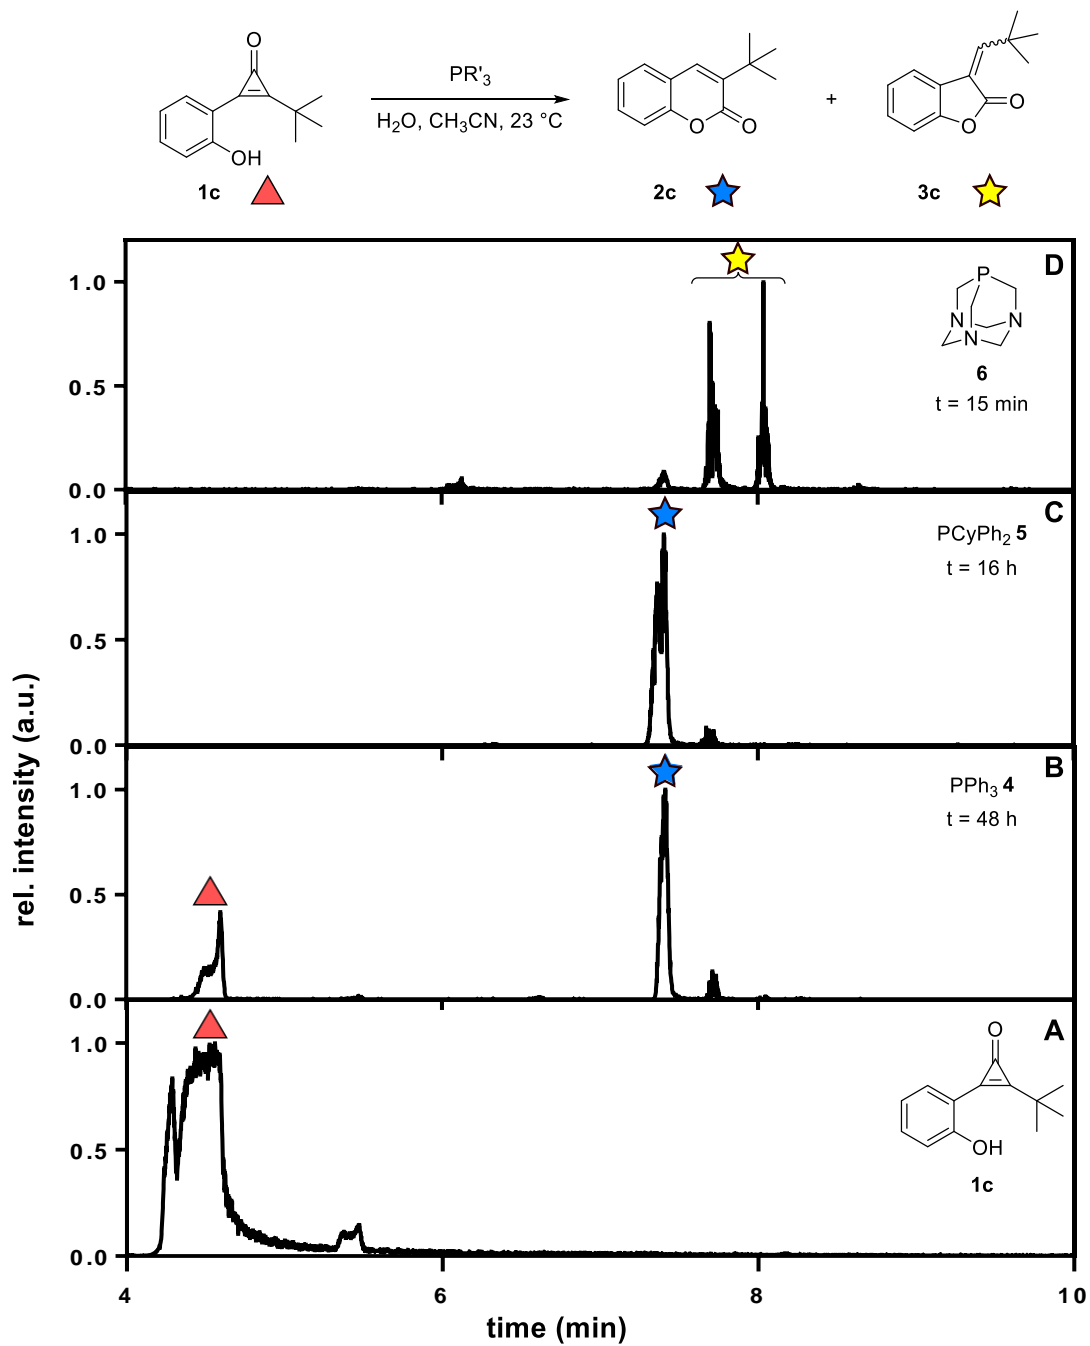

**Figure S3.** CpO **1c** reacts with phosphines **4–6** to afford the undesired product **3c**. Reaction progress was monitored using LC-MS (EIC,  $m/z$  203). (A) CpO **1c** standard. (B)–(D) Reaction between CpO **1c** and (B) PPh<sub>3</sub> (**4**), (C) PCyPh<sub>2</sub> (**5**) or (D) phosphine **6**.

**Scheme S2.** Synthesis of fluorogenic CpO probe **7**.

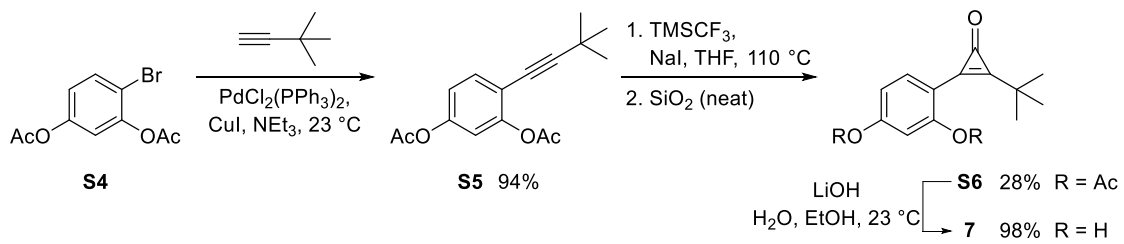

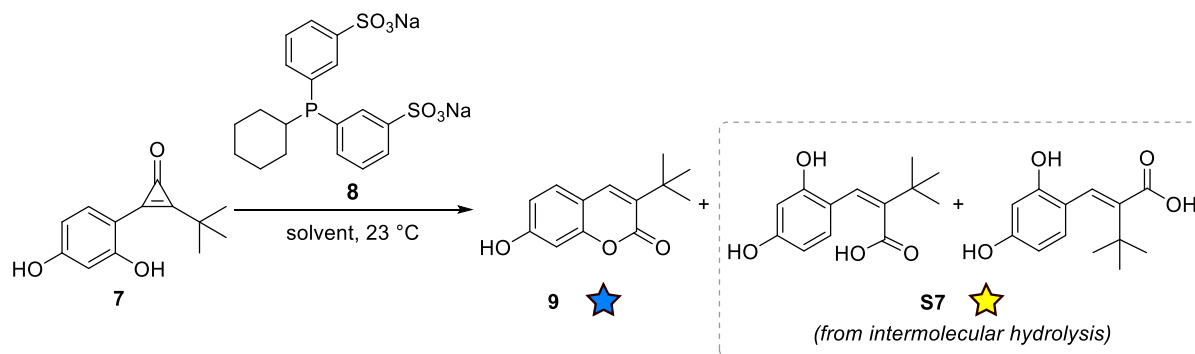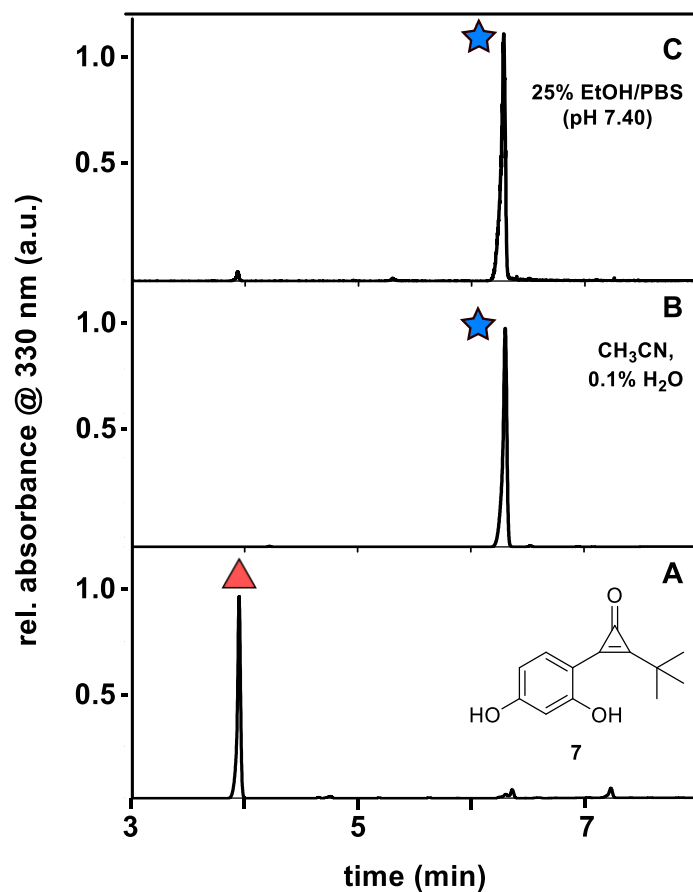

**Figure S4.** CpO **7** reacts with phosphine **8** to yield coumarin **9** in aqueous buffer. Reaction progress was tracked using UPLC (PDA  $\lambda_{\text{abs}} = 330 \text{ nm}$ ). (A) CpO **7** standard. (B-C) Reaction between CpO **1a** and phosphine **8** (5 mM, 15 mM, respectively) in (B) organic or (C) aqueous buffer.

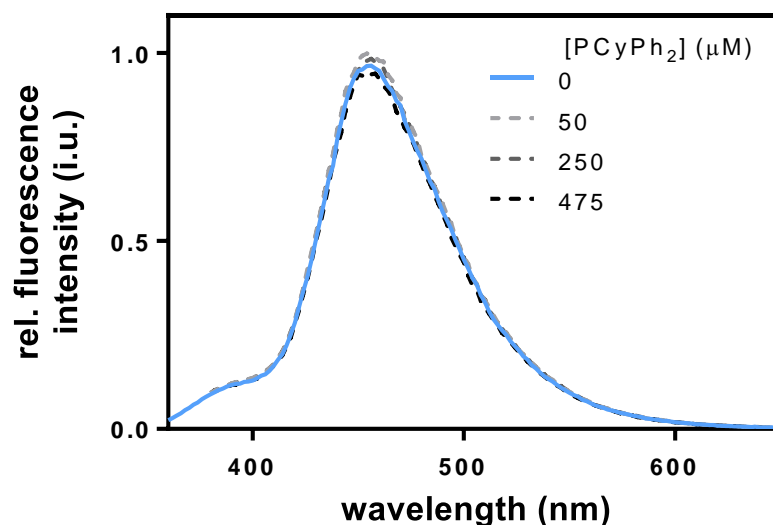

**Figure S5.** PCyPh<sub>2</sub> (**5**) does not quench the fluorescence of coumarin **9**. Coumarin **9** (50 μM) was incubated with PCyPh<sub>2</sub> (**5**) over a range of concentrations (0–475 μM, EtOH), and fluorescence spectra were recorded.

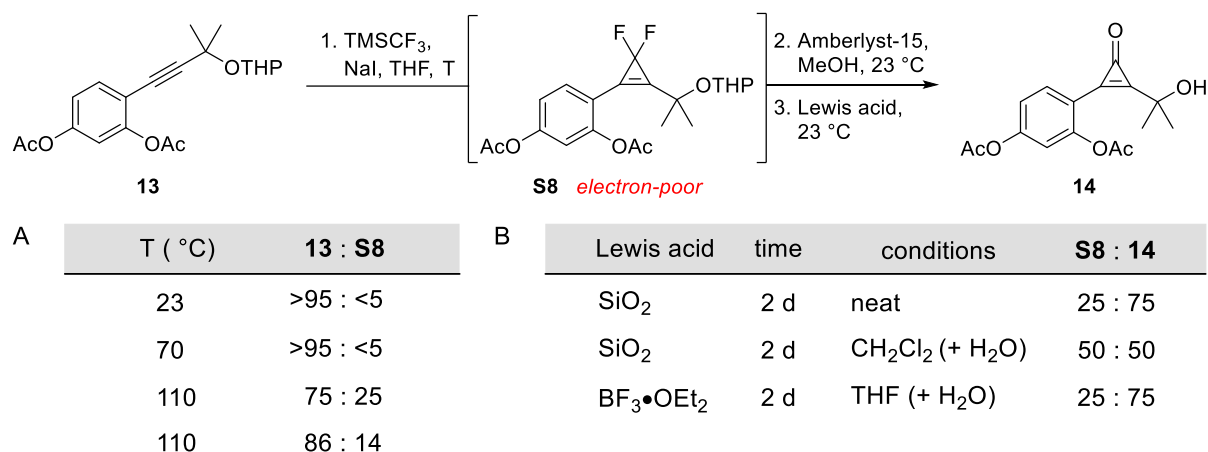

**Figure S6.** Electron-deficient aryl alkyne **13** is not readily converted to CpO **14**. (A) Minimal carbene insertion was observed across a range of temperatures. Difluorocarbene reactants oligomerize at high temperatures, which may decrease insertion yields.<sup>1</sup> (B) Difluorocarbene hydrolysis was similarly slow. Incubation with silica or BF<sub>3</sub>•OEt<sub>2</sub> required long periods of time and resulted in incomplete conversion.<sup>2–4</sup>



**Table S1.** Carbonate **17** was not accessible from CpO **16**. (A) Conditions explored for carbonate formation. (B) More polar solvents led to reagent degradation. (C) Conditions explored for deprotonation of CpO **16**. Strong bases degraded CpO **16**. (D) Control probe 2-methylbut-3-yn-2-ol (**S9**) is readily converted to the corresponding carbonate.<sup>5</sup>

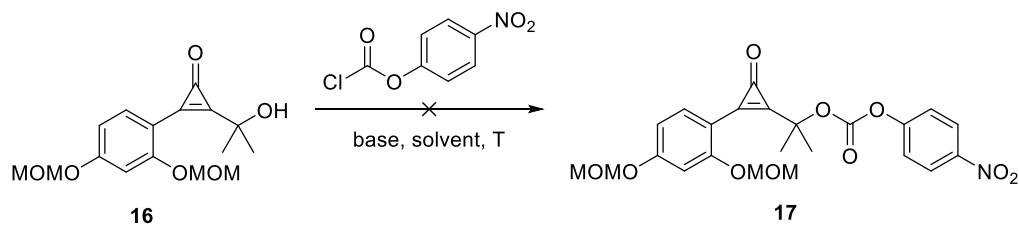

|   | solvent                         | base (equiv) | T ( °C) | time (h) | result                            |
|---|---------------------------------|--------------|---------|----------|-----------------------------------|
| A | CH <sub>2</sub> Cl <sub>2</sub> | pyr (2.0)    | 23      | 26       | CpO decomp., chloroformate recov. |
|   | CH <sub>2</sub> Cl <sub>2</sub> | pyr (6.0)    | 55      | 18       | CpO decomp., chloroformate recov. |
|   | CH <sub>2</sub> Cl <sub>2</sub> | DMAP (0.50)  | 23      | 4        | CpO & chloroformate recov.        |
|   | CH <sub>2</sub> Cl <sub>2</sub> | DMAP (0.50)  | 50      | 15       | CpO & chloroformate recov.        |
| B | pyr                             | pyr (neat)   | 23      | 18       | CpO decomp., chloroformate recov. |
|   | DMF                             | DMAP (10)    | 80      | 16       | CpO & chloroformate decomp.       |
|   | DMSO                            | pyr (6.0)    | 60      | 20       | CpO recov., chloroformate decomp. |
| C | THF                             | NaH (5.0)    | 23      | 0.5      | CpO decomp.                       |
|   | THF                             | KHMDS (1.0)  | -78     | 0.5      | CpO decomp.                       |
|   | THF                             | KHMDS (1.0)  | -78     | 0.5      | CpO decomp.                       |
|   | THF                             | LiHMDS (1.0) | -78     | 0.5      | CpO decomp.                       |

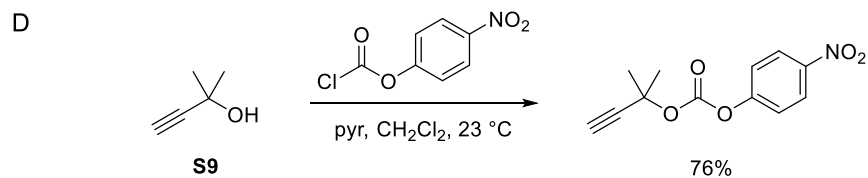

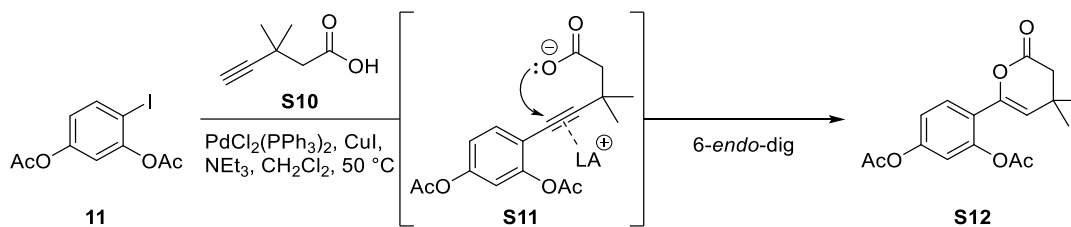

**Figure S7.** A lactonization reaction prevented synthesis of the desired aryl alkyne **S12**. Aryl iodide **11** and alkyne **S10** were ligated via Sonogashira coupling to form **S11**. Alkyne **S11** underwent a subsequent intramolecular lactonization *in situ* to yield lactone **S12**. Baldwin's rules permit 6-*endo-dig* cyclization reactions.<sup>6,7</sup>

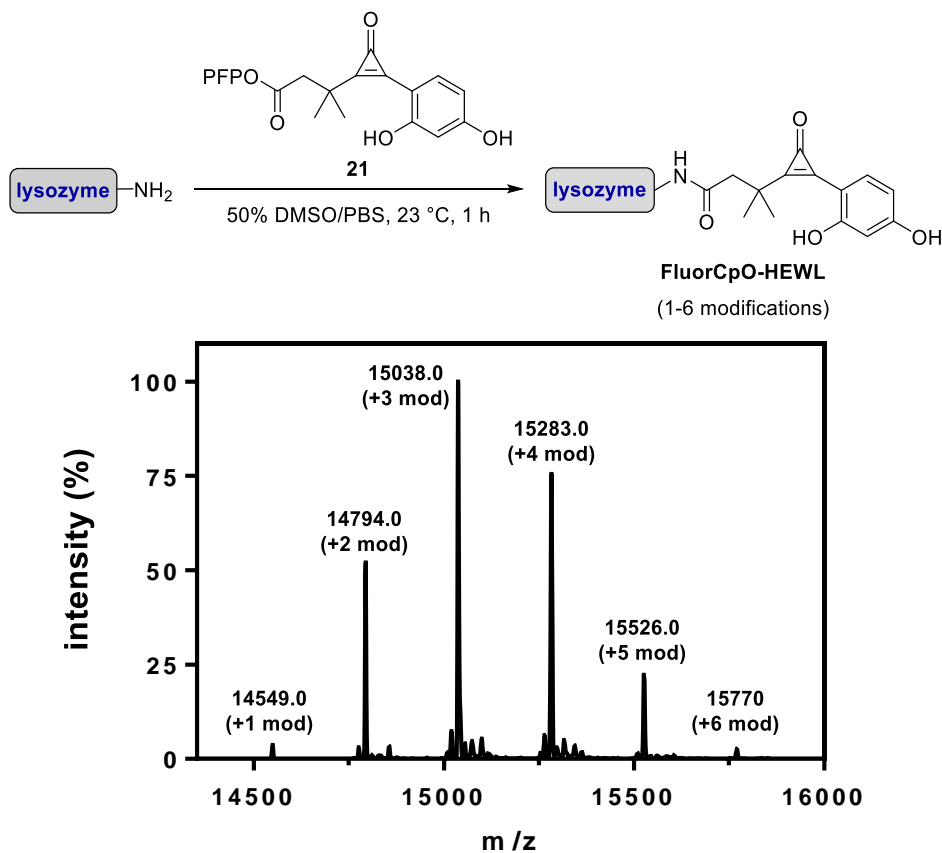

**Figure S8.** Mass spectrometry analysis of **FluorCpO-HEWL**. Lysozyme functionalization with CpO **21** was confirmed using mass spectrometry (ESI). The protein conjugate comprised 1–6 modifications.

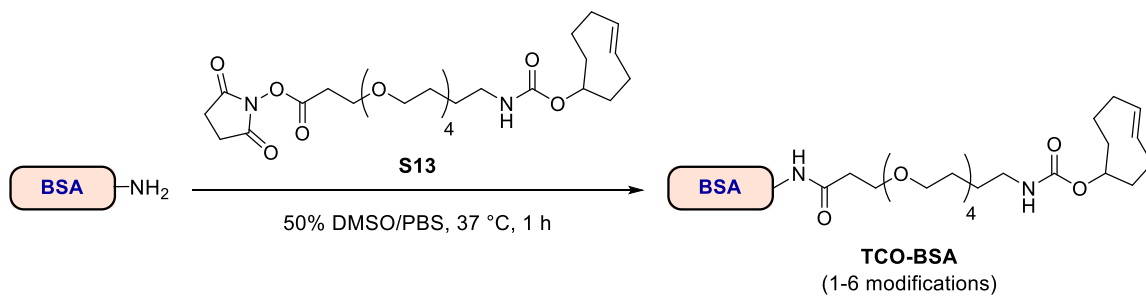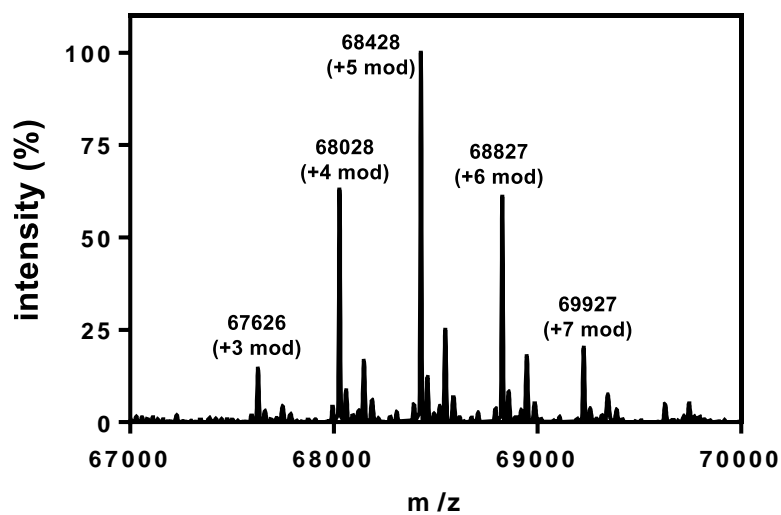

**Figure S9.** Mass spectrometry analysis of **BSA-TCO**. BSA functionalization with TCO-NHS ester **S13** was confirmed using mass spectrometry (ESI). The mixture comprised two proteins, and each protein was modified with 3–7 TCO modifications.

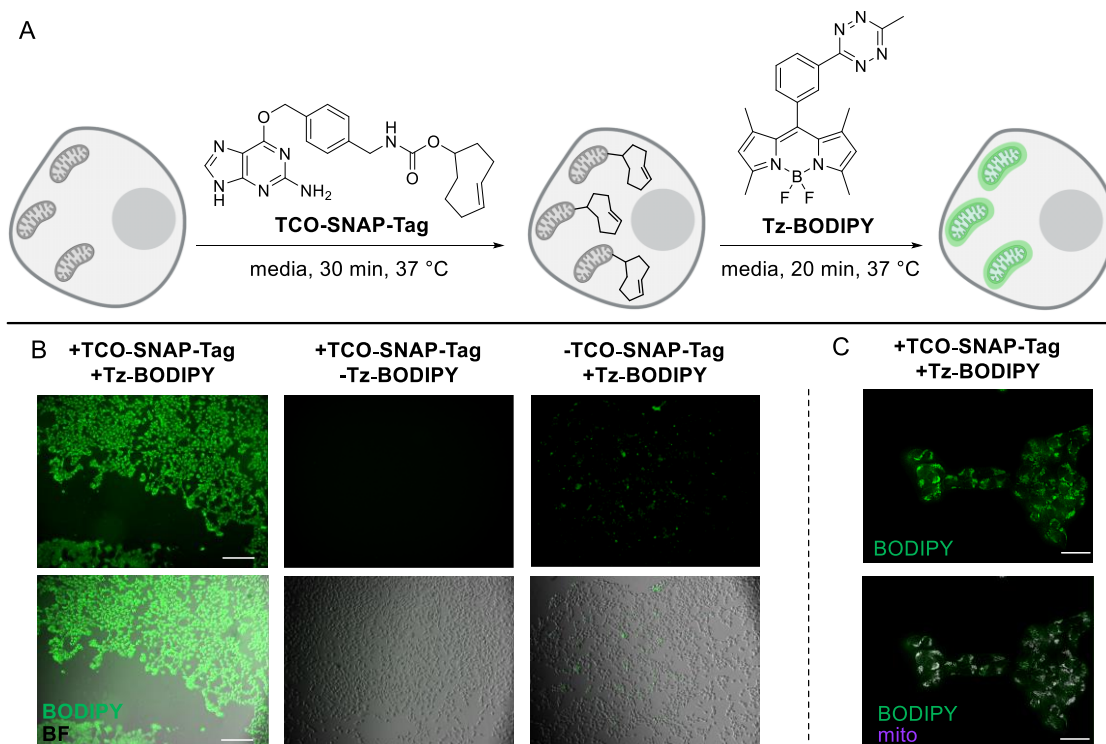

**Figure S10. TCO-SNAP-Tag labels mitochondrial proteins in MitoSNAP cells.** (A) TCO-tagged mitochondria were visualized via fluorogenic reaction with Tz-BODIPY. (B) Robust fluorescence was only observed in the presence of both compounds. (Scale bar: 200  $\mu\text{m}$ .) (C) BODIPY fluorescence colocalized with a red mitochondrial stain (MitoView 633). Data are representative of three replicate experiments. (Scale bar: 30  $\mu\text{m}$ .) Figure partially created with [BioRender.com](https://www.biorender.com).

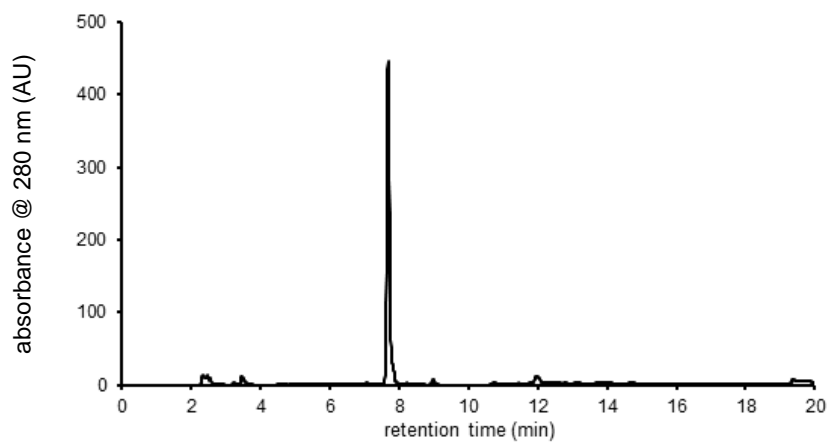

**Figure S11.** HPLC trace of **DCA-FluorCpO**. HPLC analysis was performed on an Agilent Technologies 1260 Infinity II equipped with a multiple wavelength detector, using an Agilent Eclipse XDB-C18 column (9.4 x 250 mm, 5  $\mu$ m) and a 3 mL/min flow rate (eluting with 40–100% MeCN + 0.1% FA in H<sub>2</sub>O + 0.1% FA over 20 min).

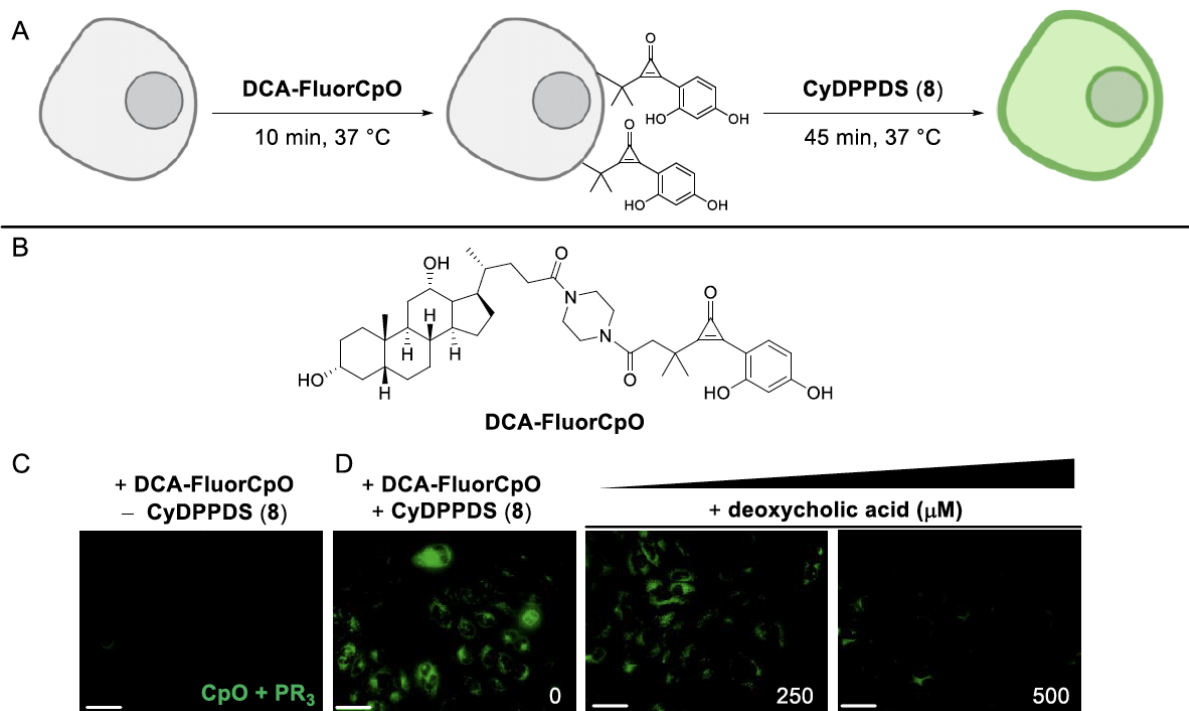

**Figure S12. DCA-FluorCpO labels HeLa cells.** (A) Scheme for visualizing **FluorCpO**-modified sterol probe with **CyDPPDS (8)**. (B) Structure of **DCA-FluorCpO**. (C) No signal was observed from **DCA-FluorCpO**-treated cells in the absence of phosphine trigger **8**. (Scale bar: 50  $\mu\text{m}$ .) (D) Fluorescent signal was observed from **DCA-FluorCpO**-treated cells upon treatment with phosphine **8**. Signal was diminished when **DCA-FluorCpO** was incubated with unlabeled deoxycholic acid prior to bioorthogonal reaction. Data are representative of three biological replicates. (Scale bars: 50  $\mu\text{m}$ .) Figure partially created with [BioRender.com](https://www.biorender.com).

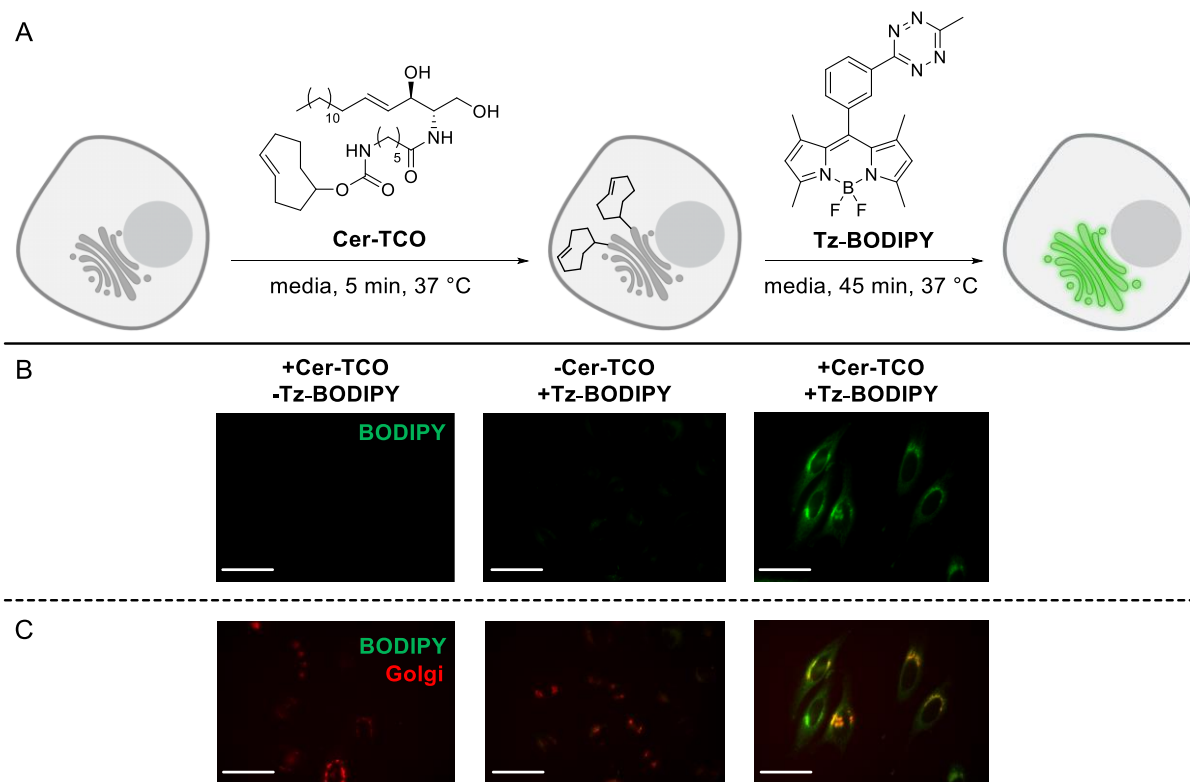

**Figure S13.** Cer-TCO labels the Golgi apparatus in live HeLa cells. (A) Scheme for visualizing TCO-tagged Golgi organelles via fluorogenic reaction with Tz-BODIPY. (B) HeLa cells were incubated with Cer-TCO (2  $\mu$ M), washed, and visualized with Tz-BODIPY (100 nM). Robust BODIPY fluorescence was only observed in the presence of both compounds. (Scale bar: 50  $\mu$ m.) (C) BODIPY fluorescence colocalized with an organellar Golgi stain, confirming Golgi localization of Cer-TCO. Data are representative of three replicate experiments. (Scale bar: 50  $\mu$ m.) Figure partially created with [BioRender.com](https://www.biorender.com/).

## General information

Reactions were run at ambient temperature under a nitrogen atmosphere, unless otherwise stated. All reagents and solvents were used as received, unless otherwise specified. Tetrahydrofuran (THF), diethyl ether (Et<sub>2</sub>O), dichloromethane (CH<sub>2</sub>Cl<sub>2</sub>), dimethylformamide (DMF), and acetonitrile (CH<sub>3</sub>CN) were prepared by degassing with argon and passing through two 4 in.  $\times$  36 in. columns of anhydrous neutral A-2 (8  $\times$  14 mesh; LaRoche Chemicals; activated at 350  $^{\circ}$ C for 12 h under a flow of argon). Column chromatography was carried out using Silicycle 60  $\text{\AA}$  (240–400 mesh) silica gel, commercially available from Sorbent Technologies. Thin-layer chromatography (TLC) was carried out with Silica Gel 60 F<sub>254</sub>-coated glass plates (0.25 mm thickness) 250 mm silica gel F-254 plates. Plates were visualized using UV light or KMnO<sub>4</sub> stain. Organic solutions were concentrated under reduced pressure using a Büchi rotary evaporator.

<sup>1</sup>H, <sup>13</sup>C, <sup>19</sup>F, and <sup>31</sup>P NMR spectra were obtained using Bruker instruments: DRX400, DRX500 equipped with a cryoprobe, or AVANCE600 equipped with a cryoprobe. <sup>1</sup>H NMR spectra were acquired at 400, 500, or 600 MHz, <sup>13</sup>C spectra were acquired at 125 or 151 MHz, and <sup>31</sup>P spectra were acquired at 162 or 243 MHz. Spectra were internally referenced to residual solvent signals (7.27 ppm for <sup>1</sup>H and 77.16

ppm for  $^{13}\text{C}$  for  $\text{CDCl}_3$ , 3.31 ppm for  $^1\text{H}$  and 49.0 ppm for  $^{13}\text{C}$  for  $\text{CD}_3\text{OD}$ , 1.94 ppm for  $^1\text{H}$  and 1.32 ppm for  $^{13}\text{C}$  for  $\text{CD}_3\text{CN}$ , and 4.79 ppm for  $^1\text{H}$  for  $\text{D}_2\text{O}$ ).  $^{19}\text{F}$  and  $^{31}\text{P}$  NMR spectra were referenced by an indirect absolute chemical shift to residual protio solvent signals. All spectra were acquired at 298 K unless stated otherwise. Chemical shifts are reported in ppm, and coupling constants ( $J$ ) are reported in hertz (Hz). Spectrophotometer and fluorimeter measurements were performed in the Laser Spectroscopy Labs at the University of California, Irvine. High resolution mass spectrometry (HRMS) was performed by the University of California, Irvine Mass Spectrometry Facility.

### CpO regioselective reactivity with phosphines

Solutions of CpO **1a–c** in  $\text{CH}_3\text{CN}$  (4–50%  $\text{H}_2\text{O}$ , final concentration = 0.01–0.1 M) were added to scintillation vials containing stir bars. Phosphines **4–6** (1–2 equiv.) were added, and the reactions were stirred at room temperature. In some cases, methanol and benzene were necessary to solubilize the phosphine reagents. Reaction progress was monitored using TLC and liquid chromatography mass spectrometry (LC–MS). When starting material was fully consumed, the reaction mixtures were concentrated *in vacuo*. The resulting crude solids were resuspended in  $\text{CDCl}_3$  and analyzed using  $^1\text{H}$  NMR spectroscopy. If necessary, the cyclized products were purified using flash chromatography. The acquired spectra were then compared to known spectra of 6-membered ring products **2a–c** to tabulate product distribution.<sup>8-9</sup>

### Photophysical measurements

Samples for absorption and emission measurements were prepared from 10 mM stock solutions in 50% EtOH/PBS (pH 7.40). The dyes were diluted to various concentrations in 50% EtOH/PBS (pH 7.40). Absorbance measurements were made on a Cary-60 UV-Vis Spectrophotometer, and fluorescence spectra were measured on a Cary Eclipse Fluorescence Spectrometer.

Fluorescence quantum yields ( $\Phi$ ) for **7**, **9–10** were determined using the method of Lemieux *et al.*<sup>11</sup> Quinine bisulfate ( $\lambda_{\text{abs}} = 317$  nm,  $\lambda_{\text{ex}} = 346$  nm,  $\lambda_{\text{em}} = 448$  nm,  $\Phi = 0.546$  in 1 N  $\text{H}_2\text{SO}_4$ ) was used as the standard. The reported  $\Phi$  values represent the mean of three independent measurements  $\pm$  one standard deviation.

### Kinetic experiments

Kinetic measurements were performed on a Biotek Synergy H1 instrument. CpO **7** (10 mM stock in EtOH, 100  $\mu\text{M}$  final concentration) was added to a Greiner 96 well black flat bottom Fluotrac plate containing PBS (pH 7.40). CyDPPDS **8** (10 mM stock solution in  $\text{H}_2\text{O}$ , final concentration = 1–5 mM) was added to the appropriate wells (final volume 100  $\mu\text{L}$ ). Fluorescence measurements ( $\lambda_{\text{ex}} = 360$  nm,  $\lambda_{\text{em}} = 455$  nm) were collected every 70 seconds for 4 h.

The rate of fluorophore formation ( $k_2$ ) was determined by tracking product formation via fluorescence and subsequent reference to a standard curve. The reported rate constant represents the mean of three independent measurements  $\pm$  one standard deviation.



## Protein functionalization and analysis

**FluorCpO-HEWL** was prepared by treating lysozyme with cyclopropanone **21**.<sup>12-14</sup> Hen egg-white lysozyme (Sigma Aldrich, 500  $\mu$ L of a 10 mg/mL solution in PBS) was treated with CpO **21** (320  $\mu$ L of a 10 mM stock in DMSO) and DMSO (180  $\mu$ L, 50% DMSO/PBS final concentration). The solution was incubated at 37 °C for 0.5–2 h. Labeling was monitored using mass spectrometry. The functionalized proteins were isolated using P10 Biogel (BioRad), eluting with PBS (12 mM, pH 7.4). Fractions containing protein were identified by absorbance measurements at 280 nm ( $A_{280}$ ). The fractions containing protein were pooled and concentrated to a volume of ~100  $\mu$ L using a spin filter (3 kDa molecular weight cutoff). PBS (12 mM, pH 7.4) was then added to bring the total volume to 300  $\mu$ L, and the sample was concentrated again. This process was repeated three times total to remove excess small molecules. Protein concentrations were measured using a Pierce<sup>®</sup> bicinchoninic acid (BCA) assay (ThermoFisher).

**BSA-TCO** was prepared by treating BSA (Fraction V, ThermoFisher) with TCO-NHS ester **S13** (Click Chemistry Tools) in a similar manner.

## In-gel fluorescence analysis of lysozyme conjugates

**FluorCpO-HEWL** (2  $\mu$ L of a 200  $\mu$ M solution in PBS, final concentration = 20  $\mu$ M) and CyDPPDS (from 1–10 mM solution in PBS, final concentration = 100  $\mu$ M–1 mM) were mixed with PBS (12 mM, pH 7.40) to a total volume of 10  $\mu$ L. The reactions were incubated at 37 °C for 5–120 min. For time course experiments, reactions were quenched with H<sub>2</sub>O<sub>2</sub> (0.1% final concentration).

To prepare samples for SDS-PAGE, 5  $\mu$ L of a 4x SDS-PAGE loading buffer (containing 8% BME) and 5  $\mu$ L of urea were added to each reaction mixture. The resultant mixture (20  $\mu$ L) was analyzed by gel electrophoresis using 20% polyacrylamide gel (140 V for 30 min). Coumarin formation was observed by in-gel fluorescence using a Bio-Rad ChemiDoc XRS+ Imaging system, exciting with the white light filter setting. Gel staining was accomplished using Coomassie Blue.

To perform fluorogenic orthogonal bioorthogonal transformations, **FluorCpO-HEWL** (3.48  $\mu$ L of a 460  $\mu$ M solution in PBS, final concentration = 40  $\mu$ M), **TCO-BSA** (0.5  $\mu$ L of a 160  $\mu$ M solution in PBS, final concentration = 2  $\mu$ M), **BODIPY-Tz** (4  $\mu$ L of a 1 mM solution in DMSO, final concentration = 100  $\mu$ M),<sup>15</sup> and **CyDPPDS** (4  $\mu$ L of a 100 mM solution in PBS, final concentration = 10 mM) were mixed with bacterial lysate from TOP10 *E. coli* cells (300  $\mu$ g) to a total volume of 40  $\mu$ L. The reactions were incubated at 37 °C for 90 min. Samples were prepared for SDS-PAGE and in-gel fluorescence analysis in a similar manner as other protein labeling experiments.

## Molecular cloning and plasmid construction methods

Polymerase chain reaction (PCR) was used to amplify the Mito-SNAP fusion protein from Addgene plasmid #136623 (pCND A3.0\_mitoSNAP was a gift from Kai Johnsson).<sup>17</sup> The following primers were used:

Fwd primer: 5'- GGCTAGCGCTACCGGTCGCCACCTCTAGAGCCGCACCATGGTGGGC -3'

Rev primer: 5'- GCCTCTGCCCTCGCCGCTGCCCTCGAGGCCAGGCCTGGTTTACCCAG -3'

Successfully amplified insert was ligated into a CRISPR pcDNA3.0 destination vector (gift from Drs. Theresa Loveless and Chang Liu, UCI) via Gibson assembly.<sup>16</sup> Linearized vector was generated via restriction enzyme digestion with *Xba*I and *Xho*I (New England Biolabs). Primer melting temperatures ( $T_m$ ) were determined using the NEB  $T_m$  calculator. All PCR reactions were performed in a BioRad C3000 Thermocycler using the following conditions: 1) 95 °C for 3 min, 2) 95 °C for 30 s, 3)  $T_m$  of primers for 30 s, 4) 72 °C for 3 min, repeat steps 2-4 twenty times, then 72 °C for 5 min, and hold at 12 °C until retrieval from the thermocycler. Gibson assembly conditions were 50 °C for 60 min and held at 12 °C until retrieval from the thermocycler. Ligated plasmid were transformed into the TOP10 strain of *E. coli* using the heat shock method. After incubation at 37 °C for 18-24 h, colonies were picked and subjected to colony PCR to check for successful gene insertion. Select colonies were expanded overnight in 3 mL LB broth supplemented with ampicillin (100 µg/mL). DNA was extracted from colonies using a Zymo Research Plasmid Mini-prep Kit.

### Cell culture and imaging

A549 cells (ATCC), HEK cells (ATCC), and HeLa cells (ATCC) were cultured in complete media (DMEM supplemented with 10% (vol/vol) fetal bovine serum (FBS, Life Technologies), penicillin (100 U/mL), and streptomycin (100 µg/mL). Cell lines stably expressing Mito-SNAP (MitoSNAP) were generated via transfection of HEK293 with Lipofectamine3000 and the following three plasmids: AAVS1 donor plasmid containing the Mito-SNAP gene, Cas9 (Addgene #41815), and AAVS1 sgRNA (Addgene #53370). Transfected cells were further cultured in complete media with puromycin (20 µg/mL) to preserve gene incorporation. Cells were incubated at 37 °C in a 5% CO<sub>2</sub> humidified chamber. Cells were serially passaged using trypsin (0.25% in HBSS, Gibco).

For live cell **FluorCpO** labeling experiments, A549 cells ( $5.0 \times 10^4$  cells/well) were added to glass microscope chamber slide (Ibidi, µ-Slide 8 well) and incubated overnight. Cells were then treated with CpO **21** (4 µL of a 50 mM solution in DMSO, final concentration = 1 mM) and incubated for 15 min at 37 °C. The cells were washed with complete media (2 x 200 µL), resuspended in fresh media (200 µL), and incubated at 15 min at 37 °C. A portion of the media (20 µL) was replaced with **CyDPPDS (8)** (20 µL of a 10 mM solution in PBS, final concentration = 1 mM), and the cells were incubated for 30 min at 37 °C. The cells were then fixed by replacing a portion of the media with 2% formaldehyde in PBS (70 µL) and incubating for 15 min at 37 °C. The cells were then completely fixed with 2% formaldehyde in PBS (200 µL) for 15 min at 37 °C. Cells were washed with PBS (2 x 200 µL). Cells were stained with a wheat-germ agglutinin fluorescein conjugate (WGA-fluorescein, Fisher Scientific, final concentration of 5 µg/mL in Hank's buffered saline solution, HBBS) for 10 min at 37 °C. The cells were washed with HBBS (2 x 200 µL) before imaging.

After washing, images were acquired on a Zeiss LSM780 confocal microscope equipped with a 40X 1.3 NA Plan Apochromat objective lens; 405-, 488-, 561-, 640-, and two-photon 710 nm lasers; and a GAsP PMT detector. Images were acquired and processed using the Zeiss Zen Black software package. To visualize the fluorogenic CpO-phosphine reaction, fluorescence images were collected by two-photon excitation with 710 nm (2% power, 800 gain). Membranes were detected using the 488 nm laser (4% power, 800 gain). Brightfield images were also collected using a 40X objective (244 gain). Images were analyzed and merged using ImageJ Fiji.

For live cell SNAP-Tag labeling, MitoSNAP cells ( $5.0 \times 10^4$  cells/well) were added to glass microscope chamber slide (Ibidi, µ-Slide 8 well) pretreated with human plasma containing fibronectin (0.1%, Sigma Aldrich). Cells were incubated overnight. The following day, media was removed and replaced with media containing **TCO-SNAP-tag** (final concentration = 20 µM). Cells were incubated for

30 min at 37 °C, then washed with complete media (3 x 200 µL) and incubated for an additional 30 min at 37 °C. During this time, cellular mitochondria were stained with MitoView 633 (200 nM, Biotium), according to the manufacturer's protocol. The media was then removed and replaced with fresh media (150 µL) containing **Tz-BODIPY** (final concentration = 1 µM). After 20 min, images were acquired using a Keyence BZ-X810 epifluorescent microscope using both the BODIPY ( $\lambda_{\text{ex}}= 450\text{--}490$  nm,  $\lambda_{\text{em}}= 500\text{--}550$  nm) and Cy5 ( $\lambda_{\text{ex}}= 560\text{--}680$  nm,  $\lambda_{\text{em}}= 625\text{--}775$  nm) cubes. Images were collected using a 10X 0.45 NA Plan Apochromat objective lens and 60X 1.42 NA Plan Apochromat oil immersion objective lens. Images were analyzed and merged using ImageJ Fiji.

For simultaneous orthogonal fluorogenic reactions, MitoSNAP cells ( $5.0 \times 10^4$  cells/well) were added to glass microscope chamber slide (Ibidi, µ-Slide 8 well) pretreated with human plasma containing fibronectin (0.1%, Sigma Aldrich). Cells were incubated overnight. The following day, media was removed and replaced with media containing **TCO-SNAP-tag** (final concentration = 20 µM). Cells were incubated for 30 min at 37 °C, then washed with complete media (3 x 200 µL) and incubated for an additional 30 min at 37 °C. Then, the cells were resuspended in fresh media (150 µL) and treated with CpO **21** (6 µL of a 25 mM solution in DMSO, final concentration = 1 mM). The cells were incubated for 15 min at 37 °C, and then washed with complete media (2 x 200 µL).

Prior to imaging, the cells were resuspended in a solution of PBS containing **Tz-BODIPY** and **CyDPPDS (8)** (final concentrations = 0.25 µM and 1 mM, respectively). Images were acquired using a Keyence BZ-X810 epifluorescent microscope, with both the DAPI/coumarin ( $\lambda_{\text{ex}}= 300\text{--}400$  nm,  $\lambda_{\text{em}}= 410\text{--}510$  nm) and eGFP/BODIPY ( $\lambda_{\text{ex}}= 450\text{--}490$  nm,  $\lambda_{\text{em}}= 500\text{--}550$  nm) filter cubes. Images were collected from multiple fields of view every minute for 90 min using a 10X 0.45 NA Plan Apochromat objective lens. It should be noted that the source power was decreased to 40% to minimize photobleaching. Images were analyzed and combined into movies using ImageJ Fiji (1 min/frame, movie speed 10 frames/second).

For live cell deoxycholate imaging, HeLa cells ( $3.0 \times 10^4$  cells/well) were added to glass microscope chamber slides (Ibidi, µ-Slide 8 well) pretreated with human plasma containing fibronectin (0.1%, Sigma Aldrich). Cells were incubated overnight. The following day, cells were washed with FluoroBrite™ DMEM (Gibco) (2 x 200 µL). Media was removed and replaced with FluoroBrite™ DMEM (Gibco) containing deoxycholate modified with a FluorCpO handle (**DCA-FluorCpO**) final concentration 500 µM) and deoxycholate (0–500 µM) and incubated for 10 min at 37 °C. Prior to imaging, the media was replaced with FluoroBrite™ DMEM (Gibco) containing CyDPPDS (**8**) (final concentration 1 mM). Images were acquired using a Keyence BZ-X810 epifluorescent microscope with both the DAPI/coumarin ( $\lambda_{\text{ex}} = 300\text{--}400$  nm,  $\lambda_{\text{em}} = 410\text{--}510$  nm) filter cube. Images were collected after 45 min using a 40X 1.3 NA Plan Apochromat objective lens. Images were analyzed using ImageJ Fiji.

For live cell Golgi organelle labeling, HeLa cells ( $3.0 \times 10^4$  cells/well) were added to glass microscope chamber slides (Ibidi, µ-Slide 8 well) pretreated with human plasma containing fibronectin (0.1%, Sigma Aldrich). After 8 h, Golgi organelles were labeled via treatment with CellLite™ Golgi-RFP, BacMam 2.0, according to the manufacturer's protocol (Invitrogen). Cells were incubated overnight. Labeled cells were then incubated with **Cer-TCO** (2 µM final concentration) for 5 min at 37 °C. Samples were then washed with FluoroBrite™ DMEM (Gibco) (3 x 200 µL) and incubated at 25 °C for 1 h. **Cer-TCO** was then visualized via reaction with **Tz-BODIPY** (100 nM final concentration) for 45 min. Images were acquired using a Keyence BZ-X810 epifluorescent microscope with both the eGFP/BODIPY ( $\lambda_{\text{ex}} = 450\text{--}490$  nm,  $\lambda_{\text{em}} = 500\text{--}550$  nm) and Texas Red/RFP ( $\lambda_{\text{ex}} = 520\text{--}600$  nm,  $\lambda_{\text{em}} = 555\text{--}705$  nm) filter cubes. Images were collected using a 60X 1.42 NA Plan Apochromat oil immersion objective lens. Images were analyzed and merged using ImageJ Fiji.

Dual metabolite labeling was performed similarly as above. HeLa cells ( $3.0 \times 10^4$  cells/well) were added to glass microscope chamber slides (Ibidi, µ-Slide 8 well) pretreated with human plasma containing fibronectin (0.1%, Sigma Aldrich). Cells were incubated overnight. The following day, cells were incubated

with **Cer-TCO** (2  $\mu\text{M}$  final concentration) for 5 min at 37 °C. The cells were then washed with FluoroBrite™ DMEM (Gibco) (3 x 200  $\mu\text{L}$ ) and incubated at 25 °C for 1 h. Media was removed from each sample and FluoroBrite™ DMEM (Gibco), containing **DCA-FluorCpO** (500  $\mu\text{M}$  final concentration) was added. Cells were then incubated for 10 min at 37 °C. Prior to imaging, the cells were resuspended in FluoroBrite™ DMEM (Gibco) containing Tz-BODIPY and CyDPPDS (**8**) (final concentrations 100 nM and 1 mM, respectively). Images were acquired using a Keyence BZ-X810 epifluorescent microscope with both the DAPI/coumarin ( $\lambda_{\text{ex}} = 300\text{--}400$  nm,  $\lambda_{\text{em}} = 410\text{--}510$  nm) and eGFP/BODIPY ( $\lambda_{\text{ex}} = 450\text{--}490$  nm,  $\lambda_{\text{em}} = 500\text{--}550$  nm) filter cubes. Images were collected after 45 min using a 40X 1.3 NA Plan Apochromat objective lens. Images were analyzed and merged using ImageJ Fiji.

## Synthetic procedures

Compounds **8**<sup>18</sup>, **11**<sup>19</sup>, **12**<sup>20</sup>, **18**,<sup>19</sup> **S1**<sup>21</sup>, **S2a**<sup>22</sup>, **S4**<sup>23</sup>, **S8**<sup>24</sup>, **S10**<sup>25</sup>, Tz-BODIPY<sup>15</sup>, TCO-SNAP-tag<sup>26</sup>, and Cer-TCO<sup>27</sup> were synthesized as previously described.

### General procedure A for Sonogashira coupling

2-Iodophenyl acetate (**S1**) was prepared as previously described.<sup>21</sup> To an oven-dried round-bottom flask with a stir bar was added **S1** (1.0 equiv.), Pd(PPh<sub>3</sub>)Cl<sub>2</sub> (10 mol%), CuI (10 mol%), and triethylamine (NEt<sub>3</sub>, 0.048–0.77 M aryl iodide), and alkyne (1.2 equiv.). The mixture was stirred at ambient temperature overnight. The resulting slurry was then dissolved in EtOAc (20 mL) and washed with sat. NH<sub>4</sub>Cl (1 x 40 mL). The organic layers were combined, dried with Na<sub>2</sub>SO<sub>4</sub>, filtered, and concentrated *in vacuo*. The crude residue was purified by flash chromatography (eluting with EtOAc in hexanes) to afford pure product.

### General procedure B for cyclopropenone synthesis

To an oven-dried Schlenk tube with a stir bar was added sodium iodide (NaI, 2.2 equiv.). The tube was gently flame-dried under vacuum, then resuspended in a solution of alkyne (1 equiv.) in anhydrous THF. Trifluoromethyltrimethylsilane (TMSCF<sub>3</sub>, 2 equiv.) was added, and the vessel was sealed and stirred vigorously at ambient temperature or while heating (23–110 °C) for 2 d. The slurry was diluted with water (30 mL) and extracted with CH<sub>2</sub>Cl<sub>2</sub> (3 x 20 mL). The organic layers were combined, dried with Na<sub>2</sub>SO<sub>4</sub>, filtered, and concentrated *in vacuo*. The resulting crude difluorocyclopropene was incubated on silica (3 g/mmol). The crude material was purified by flash column chromatography (eluting with acetone in CH<sub>2</sub>Cl<sub>2</sub>) to afford pure cyclopropenone product.

### General procedure C for cyclopropenone synthesis

To an oven-dried Schlenk tube with a stir bar was added sodium iodide (NaI, 2.2 equiv.). The tube was gently flame-dried under vacuum, then resuspended in a solution of alkyne (1 equiv.) in anhydrous THF. Trifluoromethyltrimethylsilane (TMSCF<sub>3</sub>, 2 equiv.) was added, and the vessel was sealed and stirred vigorously at ambient temperature or while heating (60–110 °C) for 2 d. The slurry was diluted with water (30 mL) and extracted with CH<sub>2</sub>Cl<sub>2</sub> (3 x 20 mL). The organic layers were combined, dried with MgSO<sub>4</sub>, filtered, and concentrated *in vacuo*.

To an oven-dried round-bottom flask with a stir bar was added a solution of crude difluorocyclopropene in anhydrous MeOH, followed by Amberlyst-15 resin (120 mg/mmol alkyne). The mixture was stirred until starting material was fully consumed. The mixture was then filtered to remove the Amberlyst-15 resin, then concentrated *in vacuo*. The crude residue was purified by flash chromatography to afford pure product.

## General procedure D for acetyl protecting group removal

To a scintillation vial with a stir bar was added cyclopropanone (1 equiv.) and ethanol (EtOH). A solution of LiOH in water (0.4–0.5 M, 1.1–2.2 equiv.) was added dropwise, and the mixture was stirred at ambient temperatures. The reaction was acidified with 1 N HCl to pH 7 and ethanol was removed by concentration *in vacuo*. The mixture was diluted with water (10 mL) and extracted with CH<sub>2</sub>Cl<sub>2</sub> (3 x 10 mL). The organic layers were combined, washed with brine (1 x 30 mL), dried with Na<sub>2</sub>SO<sub>4</sub>, filtered, and concentrated *in vacuo*. If necessary, the crude residue was purified by flash column chromatography to afford pure product.

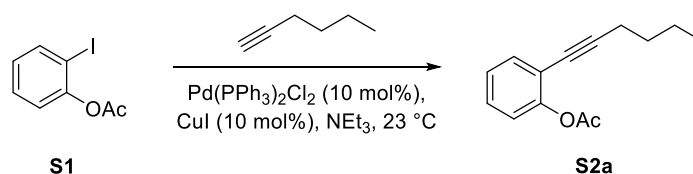

### 2-(Hex-1-yn-1-yl)phenyl acetate (**S2a**)

2-Iodophenyl acetate (**S1**) was prepared as previously described.<sup>21</sup> General procedure A was used with the following reagents: **S1** (0.600 g, 2.30 mmol, 1.00 equiv.), Pd(PPh<sub>3</sub>)<sub>2</sub>Cl<sub>2</sub> (0.161 g, 0.230 mmol, 10.0 mol%), CuI, (0.044 g, 0.23 mmol, 10 mol%), 1-hexyne (0.31 mL, 2.8 mmol, 1.2 eq), and anhydrous Et<sub>3</sub>N (30 mL, 0.08 M aryl iodide). The crude residue was purified with flash chromatography (eluting with 3% EtOAc in hexanes) to give compound **S2a** as an orange oil (0.19 g, 81%). Spectra matched those previously reported.<sup>29</sup>

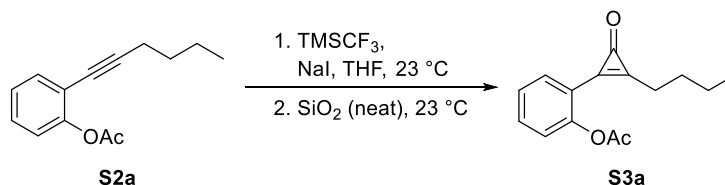

### 2-(2-Butyl-3-oxocycloprop-1-en-1-yl)phenyl acetate (**S3a**)

General procedure B was used at ambient temperature with the following reagents: **S2a** (0.373 g, 1.73 mmol), NaI (0.570 g, 3.81 mmol, 2.20 equiv.), TMSCF<sub>3</sub>, (0.52 mL, 3.5 mmol, 2.0 equiv.), and anhydrous THF (8.0 mL, 0.22 M); silica (10 g). The crude residue was purified with flash chromatography (eluting with 3% acetone in CH<sub>2</sub>Cl<sub>2</sub>) to give compound **S3a** as an orange oil (0.26 g, 62%).

<sup>1</sup>H NMR (400 MHz, CDCl<sub>3</sub>) 7.63 (dd, *J* = 7.6, 1.4 Hz, 1H), 7.48 (app td, *J* = 8.1, 1.5 Hz, 1H), 7.28 (app td, *J* = 7.6, 0.8 Hz, 1H), 7.15 (d, *J* = 8.1 Hz, 1H), 2.71 (t, *J* = 7.3 Hz, 2H), 2.41 (s, 3H), 1.75–1.61 (m, 2H), 1.47–1.33 (m, 2H), 0.88 (t, *J* = 7.3 Hz, 3H). <sup>13</sup>C NMR (151 MHz, CDCl<sub>3</sub>) δ 169.4, 156.0, 155.9, 151.1, 150.0, 133.8, 131.0, 126.4, 123.1, 117.7, 28.4, 26.3, 22.2, 21.0, 13.4. HRMS–ESI+ (*m/z*): [M+Na]<sup>+</sup> calcd for C<sub>15</sub>H<sub>16</sub>O<sub>3</sub>Na, 267.0997; found, 267.0993.

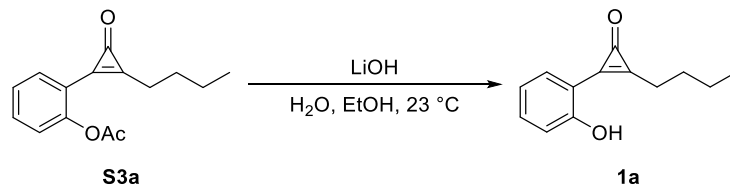

### 2-Butyl-3-(2-hydroxyphenyl)cycloprop-2-en-1-one (1a)

General procedure D was used with the following reagents: **S3a** (0.261 g, 1.07 mmol, 1.00 equiv.), LiOH (0.5 M, 2.36 mL, 1.18 mmol, 1.10 equiv.), and EtOH (12 mL, 0.089 M). Following extraction, the mixture was concentrated *in vacuo* to yield **1a** as an off-white solid (0.180 g, 84.0%).

$^1\text{H}$  NMR (400 MHz,  $\text{CDCl}_3$ )  $\delta$  10.46 (s, 1H), 7.59 (d,  $J = 7.1$  Hz, 1H), 7.39 (t,  $J = 7.4$  Hz, 1H), 7.16 (d,  $J = 8.2$  Hz, 1H), 6.90 (t,  $J = 7.4$  Hz, 1H), 2.85 (t,  $J = 7.3$  Hz, 2H), 1.83–1.73 (m, 2H), 1.53–1.40 (m, 2H), 0.95 (t,  $J = 7.3$  Hz, 3H).  $^{13}\text{C}$  NMR (101 MHz,  $\text{CDCl}_3$ )  $\delta$  159.7, 159.0, 151.3, 150.78, 135.4, 132.2, 119.7, 117.2, 111.2, 28.8, 26.5, 22.6, 13.7. HRMS–ESI+ ( $m/z$ ):  $[\text{M}+\text{Na}]^+$  calcd for  $\text{C}_{13}\text{H}_{14}\text{O}_2\text{Na}$ , 225.0892; found, 225.0902.

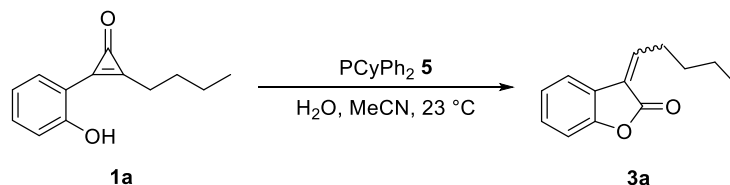

### 3-Pentylidenebenzofuran-2(3H)-one (3a)

Compound **1a** (0.033 g, 0.17 mmol, 1.0 equiv.) was dissolved in a mixture of  $\text{H}_2\text{O}/\text{C}_6\text{H}_6/\text{CH}_3\text{CN}$  mixture (0.15 mL  $\text{H}_2\text{O}$ , 0.6 mL  $\text{C}_6\text{H}_6$ , 2.0 mL  $\text{CH}_3\text{CN}$ , 0.062 M CpO) in a scintillation vial with a stir bar. Cyclohexyldiphenylphosphine (**5**,  $\text{PCyPh}_2$ , 0.044 g, 0.17 mmol, 1.0 equiv.) was added as a solid to the mixture, and the reaction was stirred at room temperature. The mixture was concentrated *in vacuo*. To ease purification, the remaining  $\text{PCyPh}_2$  was oxidized using a dilute hydrogen peroxide solution ( $\text{H}_2\text{O}_2$ , 3% in  $\text{H}_2\text{O}$ ). The crude residue was purified by flash chromatography (eluting with 5% EtOAc in hexanes) to yield compounds **3a** as a 10:1 mixture of stereoisomers (0.013 g, 38%) in the form of a white solid.

$^1\text{H}$  NMR (400 MHz,  $\text{CDCl}_3$ )  $\delta$  (major stereoisomer) 7.59 (d,  $J = 7.5$  Hz, 1H), 7.34 (app td,  $J = 7.9, 1.3$  Hz, 1H), 7.20–7.11 (m, 3H), 2.71 (q,  $J = 7.6$  Hz, 2H), 1.70–1.56 (m, 2H), 1.54–1.42 (m, 2H), 1.01–0.94 (m, 4H). (minor stereoisomer) 7.50–7.44 (m, 1H), 7.42 (dd,  $J = 7.9, 1.3$  Hz, 1H), 7.20–7.11 (m, 3H), 7.01 (t,  $J = 8.0$  Hz, 1H), 2.97 (app dd,  $J = 15.2, 7.8$  Hz, 1H), 1.70–1.56 (m, 2H), 1.54–1.42 (m, 2H), 1.01–0.94 (m, 4H).  $^{13}\text{C}$  NMR (151 MHz,  $\text{CDCl}_3$ )  $\delta$  (major stereoisomer) 168.2, 154.0, 146.9, 130.0, 124.1, 123.6, 123.4, 123.0, 111.2, 30.56, 29.6, 22.7, 14.0. (minor stereoisomer) 166.8, 152.8, 147.0, 129.7, 124.4, 123.9, 123.8, 122.8, 111.0, 31.1, 28.2, 22.6, 14.0. HRMS–ESI+ ( $m/z$ ):  $[\text{M}+\text{Na}]^+$  calcd for  $\text{C}_{13}\text{H}_{14}\text{O}_3\text{Na}$ , 225.0802; found, 225.0902.

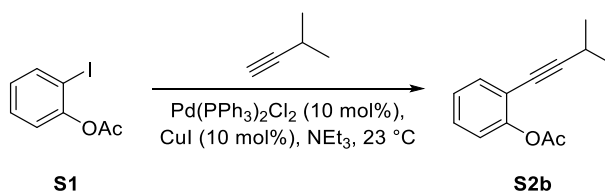

### 2-(3-Methylbut-1-yn-1-yl)phenyl acetate (S2b)

General procedure A was used with the following amounts of reagents: 2-iodophenol acetate (**S1**, 0.300 g, 1.15 mmol, 1.00 equiv.), Pd(PPh<sub>3</sub>)<sub>2</sub>Cl<sub>2</sub> (0.080 g, 0.11 mmol, 10 mol%), CuI (0.021 g, 0.11 mmol, 10 mol%), 3-methyl-1-butyne (0.34 mL, 3.3 mmol, 3.0 eq), and anhydrous Et<sub>3</sub>N (3.0 mL, 0.038 M). The crude residue was purified with flash chromatography (eluting with 1.5% EtOAc in hexanes) to give compound **S2b** as an orange oil (0.24 g, 95%).

<sup>1</sup>H NMR (600 MHz, CDCl<sub>3</sub>) δ 7.45 (dd, *J* = 7.7, 1.3 Hz, 1H), 7.29 (app td, *J* = 7.9, 1.4 Hz, 1H), 7.17 (app t, *J* = 7.6 Hz, 1H), 7.06 (d, *J* = 8.1 Hz, 1H), 2.80 (hept, *J* = 6.9 Hz, 1H), 2.34 (s, 3H), 1.27 (d, *J* = 6.9 Hz, 6H). <sup>13</sup>C NMR (151 MHz, CDCl<sub>3</sub>) δ 168.9, 151.7, 133.1, 128.8, 125.9, 122.1, 118.2, 101.0, 74.8, 23.1, 21.4, 21.0. HRMS–ESI+ (*m/z*): [M+Na]<sup>+</sup> calcd for C<sub>13</sub>H<sub>14</sub>O<sub>2</sub>Na, 225.0892; found, 225.0889.

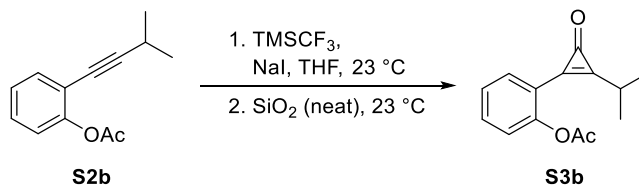

### 2-(2-Isopropyl-3-oxocycloprop-1-en-1-yl)phenyl acetate (**S3b**)

General procedure B was used at ambient temperature with the following reagents: **S2b** (0.243 g, 1.20 mmol, 1.00 equiv.), NaI (0.375 g, 2.60 mmol, 2.20 equiv.), TMSCF<sub>3</sub> (0.36 mL, 2.4 mmol, 2.0 equiv.), and anhydrous THF (5.0 mL, 0.24 M); silica (5 g). The crude residue was purified with flash chromatography (eluting with 10% acetone in CH<sub>2</sub>Cl<sub>2</sub>) to give compound **S3b** as a yellow oil (0.16 g, 57%).

<sup>1</sup>H NMR (600 MHz, CDCl<sub>3</sub>) δ 7.73 (dd, *J* = 7.7, 1.6 Hz, 1H), 7.62 – 7.55 (m, 1H), 7.38 (td, *J* = 7.6, 1.1 Hz, 1H), 7.24 (dd, *J* = 8.2, 1.0 Hz, 1H), 3.17 (hept, *J* = 7.0 Hz, 1H), 2.52 (s, 3H), 1.42 (d, *J* = 7.0 Hz, 6H). <sup>13</sup>C NMR (151 MHz, CDCl<sub>3</sub>) δ 169.9, 160.3, 156.2, 151.9, 149.2, 134.1, 131.3, 126.7, 123.6, 117.9, 27.9, 21.4, 20.4. HRMS–ESI+ (*m/z*): [M+Na]<sup>+</sup> calcd for C<sub>14</sub>H<sub>14</sub>O<sub>3</sub>Na, 253.0841; found, 253.0843.

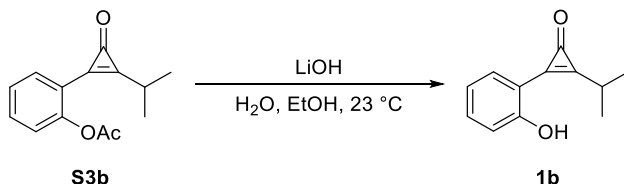

### 2-(2-Hydroxyphenyl)-3-isopropylcycloprop-2-en-1-one (**1b**)

General procedure D was used with the following reagents: **S3b** (0.101 g, 0.440 mmol, 1.00 equiv.), LiOH (0.50 M, 1.2 mL, 0.63 mmol, 1.1 equiv.), and EtOH (6 mL). The mixture was concentrated *in vacuo* to yield compound **1b** as a white solid (0.010 g, 80%).

<sup>1</sup>H NMR (600 MHz, CDCl<sub>3</sub>) δ 7.56 (dd, *J* = 7.7, 1.6 Hz, 1H), 7.44 (ddd, *J* = 8.8, 7.4, 1.7 Hz, 1H), 7.16 (dd, *J* = 8.3, 0.6 Hz, 1H), 6.98–6.91 (m, 1H), 3.19 (hept, *J* = 7.0 Hz, 1H), 1.45 (d, *J* = 7.0 Hz, 6H). <sup>13</sup>C NMR (151 MHz, CDCl<sub>3</sub>) δ 160.6, 158.5, 154.4, 150.0, 135.6, 131.3, 120.0, 117.5, 110.8, 27.6, 20.4. HRMS–GC–MS (*m/z*): [M]<sup>+</sup> calcd for C<sub>12</sub>H<sub>12</sub>O<sub>2</sub>, 188.0837; found, 188.0844.

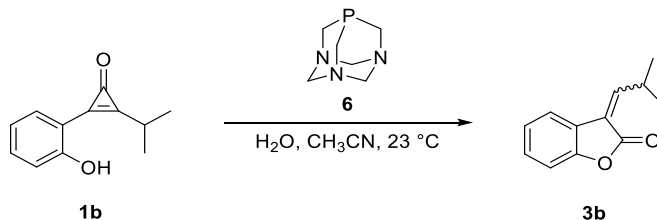

### 3-(2-Methylpropylidene)benzofuran-2(3H)-one (**3b**)

Compound **1b** (0.015 g, 0.080 mmol, 1.0 equiv.) was dissolved in a mixture of H<sub>2</sub>O/CH<sub>3</sub>CN mixture (4 mL H<sub>2</sub>O, 4.0 mL CH<sub>3</sub>CN, 0.01 M CpO) in a scintillation vial with a stir bar. 1,3,5-Triaza-7-phosphaadamantane (**6**, PTA, 0.025 g, 0.16 mmol, 2.0 equiv.) was added as a solid to the mixture, and the reaction was stirred at room temperature. The mixture was concentrated *in vacuo*. The crude residue was purified by flash chromatography (eluting with 5% EtOAc in pentanes) to yield compound **3b** as a 10:1 mixture of stereoisomers (0.0024 g, 16%) as a white solid.

<sup>1</sup>H NMR (600 MHz, CDCl<sub>3</sub>) δ (major stereoisomer) δ 7.58 (d, *J* = 7.6 Hz, 1H), 7.34 (t, *J* = 7.8 Hz, 1H), 7.17 (t, *J* = 7.6 Hz, 1H), 7.15–7.12 (m, 1H), 6.97 (d, *J* = 10.0 Hz, 1H), 3.25 (dhept, *J* = 10.3, 6.6 Hz, 1H), 1.24 (d, *J* = 6.7 Hz, 6H). (minor stereoisomer) 7.44–7.41 (m, 1H), 7.31 (t, *J* = 7.9 Hz, 1H), 7.15–7.12 (m, 1H), 7.08 (d, *J* = 7.9 Hz, 1H), 6.80 (d, *J* = 10.2 Hz, 1H), 4.00–3.90 (m, 1H), 1.17 (d, *J* = 6.6 Hz, 6H). <sup>13</sup>C NMR (151 MHz, CDCl<sub>3</sub>) δ (major stereoisomer) 168.6, 154.0, 152.8, 130.0, 124.1, 123.6, 122.6, 121.6, 111.3, 29.1, 21.7. (minor stereoisomer) 166.6, 152.9, 152.9, 129.7, 123.9, 123.8, 120.9, 119.8, 111.0, 27.2, 22.3. HRMS–ESI+ (*m/z*): [M+Na]<sup>+</sup> calcd for C<sub>12</sub>H<sub>12</sub>O<sub>2</sub>Na, 211.0837; found, 211.0830.

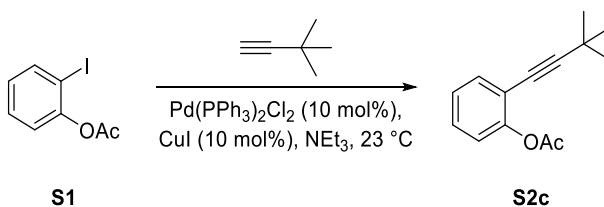

### 2-(3,3-Dimethylbut-1-yn-1-yl)phenyl acetate (**S2c**)

General procedure A was used with the following amounts of reagents: **S1** (0.359 g, 1.37 mmol, 1.0 equiv.), Pd(PPh<sub>3</sub>)<sub>2</sub>Cl<sub>2</sub> (0.080 g, 0.11 mmol, 8 mol%), CuI, (0.021 g, 0.11 mmol, 8 mol%), 3,3-dimethyl-1-butyne (0.39 mL, 1.4 mmol, 3.0 equiv.), and anhydrous Et<sub>3</sub>N (25 mL, 0.55 M). The crude residue was purified with flash chromatography (eluting with 10% EtOAc in hexanes) to give compound **S2c** as an orange oil (0.26 g, 89%).

<sup>1</sup>H NMR (600 MHz, CDCl<sub>3</sub>) δ 7.44 (dd, *J* = 7.7, 1.5 Hz, 1H), 7.29 (app td, *J* = 7.8, 1.6 Hz, 1H), 7.17 (app td, *J* = 7.6, 1.1 Hz, 1H), 7.06 (dd, *J* = 8.1, 0.9 Hz, 1H), 2.34 (s, 3H), 1.32 (s, 9H). <sup>13</sup>C NMR (151 MHz, CDCl<sub>3</sub>) δ 168.8, 151.6, 133.1, 128.7, 125.9, 122.1, 118.2, 103.8, 74.1, 31.1, 28.3, 21.0. HRMS–ESI+ (*m/z*): [M+Na]<sup>+</sup> calcd for C<sub>14</sub>H<sub>16</sub>O<sub>2</sub>Na, 239.1048; found, 239.1047.



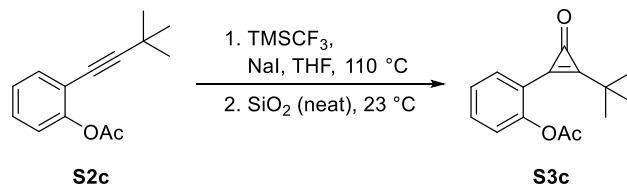

### 2-(2-(*tert*-Butyl)-3-oxocycloprop-1-en-1-yl)phenyl acetate (**S3c**)

General procedure B was used with heating at 110 °C with the following reagents: **S2c** (0.108 g, 0.500 mmol), NaI (0.165 g, 1.10 mmol, 2.2 equiv.), TMSCF<sub>3</sub> (0.15 mL, 1.0 mmol, 2.0 equiv.), and anhydrous THF (8.0 mL, 0.063 M alkyne); silica (5 g). The crude residue was purified with flash chromatography (eluting with 10% acetone in CH<sub>2</sub>Cl<sub>2</sub>) to give compound **S3c** as an orange oil (0.078 g, 57%).

<sup>1</sup>H NMR (500 MHz, CDCl<sub>3</sub>) δ 7.75–7.69 (m, 1H), 7.58 (ddd, *J* = 8.2, 7.5, 1.7 Hz, 1H), 7.38 (app td, *J* = 7.6, 1.2 Hz, 1H), 7.25–7.18 (m, 1H), 2.53 (s, 3H), 1.45 (s, 9H). <sup>13</sup>C NMR (151 MHz, CDCl<sub>3</sub>) δ 170.1, 162.8, 156.4, 152.3, 148.3, 134.0, 131.1, 126.7, 123.7, 118.0, 34.3, 28.4, 21.5. HRMS–ESI+ (*m/z*): [M+Na]<sup>+</sup> calcd for C<sub>15</sub>H<sub>16</sub>O<sub>3</sub>Na, 267.0997; found, 267.1002.

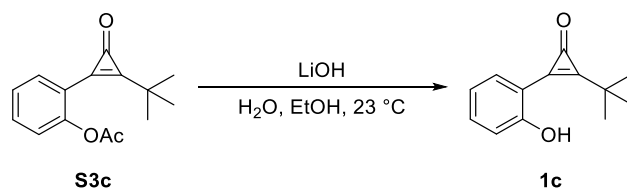

### 2-(*tert*-Butyl)-3-(2-hydroxyphenyl)cycloprop-2-en-1-one (**1c**)

General procedure D was used with the following reagents: **S3c** (0.078 g, 0.32 mmol, 1.0 equiv.), LiOH in water (0.5 M, 0.70 mL, 0.35 mmol, 1.1 equiv.), and EtOH (8.0 mL, 0.040 M CpO). The mixture was concentrated *in vacuo* to yield **1c** as an off-white solid (0.056 g, 87%).

<sup>1</sup>H NMR (600 MHz, CDCl<sub>3</sub>) δ 7.56 (dd, *J* = 7.7, 1.5 Hz, 1H), 7.47–7.38 (m, 1H), 7.17 (d, *J* = 8.3 Hz, 1H), 6.94 (app t, *J* = 7.5 Hz, 1H), 1.48 (s, 9H). <sup>13</sup>C NMR (151 MHz, CDCl<sub>3</sub>) δ 161.0, 158.5, 156.6, 149.2, 135.6, 131.2, 119.8, 117.6, 110.6, 77.4, 77.2, 77.0, 33.9, 28.4. HRMS–ESI+ (*m/z*): [M+Na]<sup>+</sup> calcd for C<sub>13</sub>H<sub>14</sub>O<sub>2</sub>Na, 225.0892; found, 225.0890.

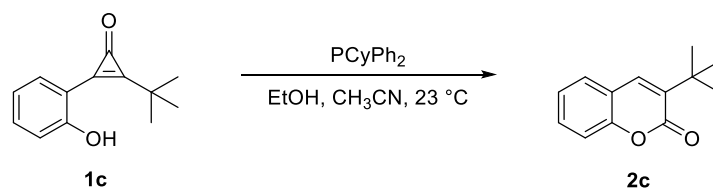

### 3-(*tert*-Butyl)-2H-chromen-2-one (**3c**)

Compound **1c** (0.012 g, 0.059 mmol, 1.0 equiv.) was dissolved in a mixture of organic solvents (0.10 mL EtOH, 2.5 mL CH<sub>3</sub>CN, 0.022 M) in a scintillation vial with a stir bar. Cyclohexyldiphenylphosphine (**5**, PCyPh<sub>2</sub>, 0.016 g, 0.059 mmol, 1.0 equiv.) was added as a solid to the mixture, and the reaction was stirred at room temperature. The mixture was concentrated *in vacuo*. To ease chromatographic separation, remaining phosphine **5** was oxidized with a dilute hydrogen peroxide solution (0.1% H<sub>2</sub>O<sub>2</sub>, H<sub>2</sub>O, CH<sub>3</sub>CN). The mixture was then concentrated *in vacuo*. The crude residue was purified by flash chromatography

(eluting with CH<sub>2</sub>Cl<sub>2</sub>) to yield compound **2c** as a white solid (0.064 g, 48%). Spectra matched those previously reported.<sup>8</sup>

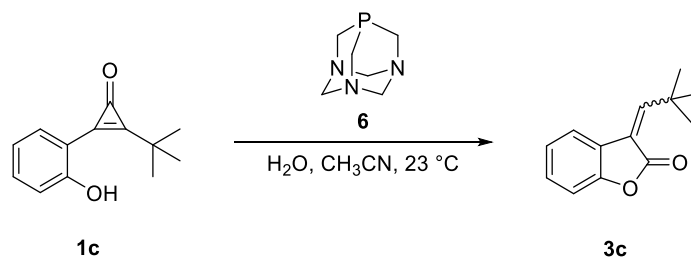

### 3-(2,2-Dimethylpropylidene)benzofuran-2(3H)-one (**3c**)

Compound **1c** (0.020 g, 0.099 mmol, 1.0 equiv.) was dissolved in a mixture of H<sub>2</sub>O and CH<sub>3</sub>CN (4 mL H<sub>2</sub>O, 4.0 mL CH<sub>3</sub>CN, 0.01 M CpO) in a scintillation vial with a stir bar. 1,3,5-Triaza-7-phosphaadamantane (**6**, PTA, 0.031 g, 0.20 mmol, 2.0 equiv.) was added as a solid to the mixture, and the reaction was stirred at room temperature. The reaction was then concentrated *in vacuo*. The crude residue was purified with flash chromatography (eluting with CH<sub>2</sub>Cl<sub>2</sub>). During purification and characterization, the mixture of stereoisomers converted to a single product **3c** (0.0040 g, 20%) as a beige solid.

<sup>1</sup>H NMR (400 MHz, CDCl<sub>3</sub>) δ 7.73 (dd, *J* = 7.8, 1.2 Hz, 1H), 7.35 (td, *J* = 7.8, 1.3 Hz, 1H), 7.27 (s, 1H), 7.19 (td, *J* = 7.7, 1.1 Hz, 1H), 7.14 (ddd, *J* = 8.0, 1.1, 0.5 Hz, 1H), 1.41 (s, 9H). <sup>13</sup>C NMR (126 MHz, CDCl<sub>3</sub>) δ 169.5, 157.5, 154.6, 130.1, 126.4, 123.9, 122.2, 121.3, 111.4, 33.5, 29.1. HRMS–ESI+ (*m/z*): [M+Na]<sup>+</sup> calcd for C<sub>13</sub>H<sub>16</sub>O<sub>2</sub>Na, 227.1048; found, 227.1066.

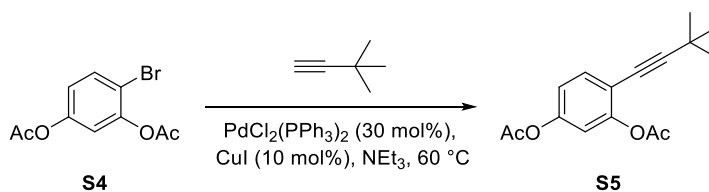

### 4-(3,3-Dimethylbut-1-yn-1-yl)-1,3-phenylene diacetate (**S4**)

4-Bromo-1,3-phenylene diacetate (**S4**) was prepared as previously described.<sup>23</sup> To an oven-dried round-sealed tube with a stir bar was added **S4** (0.400 g, 1.48 mmol, 1.00 equiv.), Pd(PPh<sub>3</sub>)Cl<sub>2</sub> (0.312 g, 0.440 mmol, 30.0 mol%), CuI (0.020 g, 0.15 mmol, 10 mol%), and anhydrous NEt<sub>3</sub> (14 mL, 0.11 M aryl iodide). 3,3-Dimethyl-1-butyne (0.92 mL, 7.4 mmol, 5.0 equiv.) was added dropwise to the reaction over a period of 30 min. The tube was then sealed, and the mixture was stirred at 60 °C overnight. The resultant slurry was then washed with saturated NH<sub>4</sub>Cl (1 x 40 mL), and extracted into EtOAc (3 x 20 mL). The organic layers were combined, dried with Na<sub>2</sub>SO<sub>4</sub>, filtered, and concentrated *in vacuo*. The crude residue was purified by flash chromatography (eluting with 5% EtOAc in hexanes) to afford an amber oil. This oil comprised an inseparable mixture of the desired aryl alkyne product **S5** and remaining aryl bromide starting material (90% purity, 9 **S5** : 1 aryl bromide **S4**). This mixture was used directly in the next step without further purification.

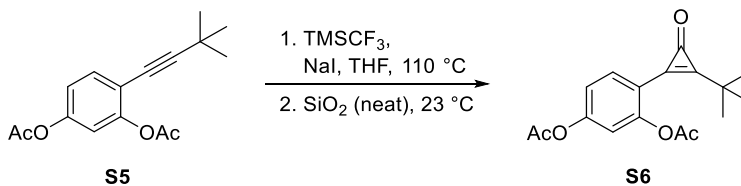

#### 4-(2-(*tert*-Butyl)-3-oxocycloprop-1-en-1-yl)-1,3-phenylene diacetate (**S6**)

General procedure B was used with heating at 110 °C with the following reagents: **S5** (0.100g, 0.360 mmol, 1 equiv., 90% purity), NaI (0.120 g, 0.800 mmol, 2.2 equiv.), TMSCF<sub>3</sub>, (0.11 mL, 0.72 mmol, 2.0 equiv.), and anhydrous THF (4.0 mL, 0.090 M alkyne); silica (3 g). The crude residue was purified with flash chromatography (eluting with 3% acetone in CH<sub>2</sub>Cl<sub>2</sub>) to give compound **S6** as a yellow oil (0.029 g, 27% over two steps from **S4**).

<sup>1</sup>H NMR (600 MHz, CDCl<sub>3</sub>) δ 7.73 (d, *J* = 8.5 Hz, 1H), 7.17 (dd, *J* = 8.5, 2.2 Hz, 1H), 7.08 (d, *J* = 2.2 Hz, 1H), 2.52 (s, 3H), 2.32 (s, 3H), 1.44 (s, 9H). <sup>13</sup>C NMR (151 MHz, CDCl<sub>3</sub>) δ 169.6, 168.4, 162.2, 156.0, 154.5, 153.1, 147.5, 131.7, 120.0, 117.3, 115.5, 34.2, 28.4, 21.4, 21.3. HRMS–ESI+ (*m/z*): [M+Na]<sup>+</sup> calcd for C<sub>17</sub>H<sub>18</sub>O<sub>5</sub>Na, 325.1052; found, 325.1053.

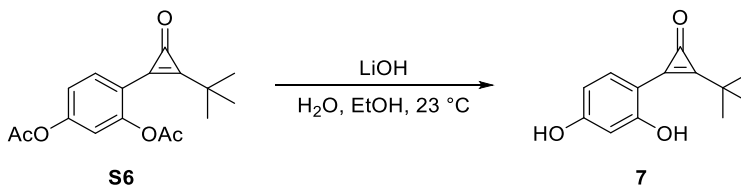

#### 2-(*tert*-Butyl)-3-(2,4-dihydroxyphenyl)cycloprop-2-en-1-one (**7**)

General procedure D was used with the following reagents: **S6** (0.029 g, 0.096 mmol, 1.0 equiv.), LiOH in water (0.25 M, 1.5 mL, 0.38 mmol, 4.0 equiv.), and EtOH (3.6 mL, 0.027 M CpO). The mixture was quenched with saturated NaHCO<sub>3</sub> (5 mL) and concentrated *in vacuo* to remove EtOH. The mixture was extracted with EtOAc (3 x 5 mL). The organic layers were combined, dried with Na<sub>2</sub>SO<sub>4</sub>, filtered, and concentrated *in vacuo*. The crude residue was purified by flash chromatography (eluting with 30% acetone in CH<sub>2</sub>Cl<sub>2</sub>) to afford compound **7** as a yellow solid (0.0096 g, 46%).

<sup>1</sup>H NMR (400 MHz, CDCl<sub>3</sub>) δ 7.53 (d, *J* = 8.4 Hz, 1H), 6.44–6.36 (m, 2H), 1.41 (s, 9H). <sup>13</sup>C NMR (151 MHz, CD<sub>3</sub>OD) δ 165.8, 161.8, 159.9, 153.4, 148.6, 136.8, 109.3, 104.1, 103.3, 34.8, 28.7. HRMS–ESI+ (*m/z*): [M+Na]<sup>+</sup> calcd for C<sub>13</sub>H<sub>14</sub>O<sub>3</sub>Na, 241.0841; found, 241.0832.

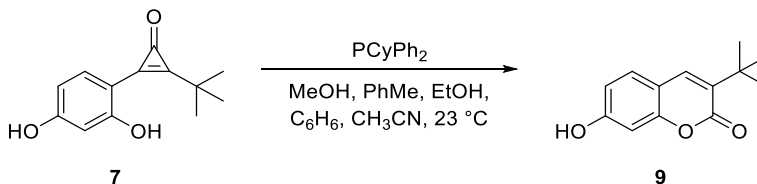

#### 3-(*tert*-Butyl)-7-hydroxy-2H-chromen-2-one (**9**)

Compound **7** (0.0097 g, 0.044 mmol, 1.0 equiv.) was dissolved in a mixture of organic solvents (0.11 mL MeOH, 0.22 mL PhMe, 0.26 mL C<sub>6</sub>H<sub>6</sub>, 0.44 mL EtOH, 0.79 mL CH<sub>3</sub>CN, 0.023 M) in a scintillation vial with a stir bar. Cyclohexyldiphenylphosphine (**5**, PCyPh<sub>2</sub>, 0.012 g, 0.044 mmol, 1.0 equiv.) was added as a solid to the mixture, and the reaction was covered in aluminum foil and stirred at room temperature. The mixture was concentrated *in vacuo*. The crude residue was purified by flash chromatography (eluting with 20% EtOAc in hexanes) to yield compound **9** as a white solid (0.064 g, 66%).

<sup>1</sup>H NMR (500 MHz, CDCl<sub>3</sub>) δ 7.71 (s, 1H), 7.55 (s, 1H), 7.35 (d, *J* = 8.5 Hz, 1H), 7.07 (d, *J* = 2.3 Hz, 1H), 6.87 (dd, *J* = 8.5, 2.3 Hz, 1H), 1.40 (s, 9H). δ 7.50 (s, 1H), 7.34 (d, *J* = 8.4 Hz, 1H), 6.84 (d, *J* = 2.5 Hz, 1H), 6.77 (dd, *J* = 8.4, 2.4 Hz, 1H), 1.39 (s, 9H). <sup>13</sup>C NMR (151 MHz, CDCl<sub>3</sub>) δ 160.6, 158.3, 154.8, 137.0, 133.7, 129.05, 113.5, 112.8, 102.6, 77.3, 77.2, 77.0, 34.9, 28.8. HRMS–ESI+ (*m/z*): [M+Na]<sup>+</sup> calcd for C<sub>13</sub>H<sub>14</sub>O<sub>3</sub>Na, 241.0841; found, 241.0840.

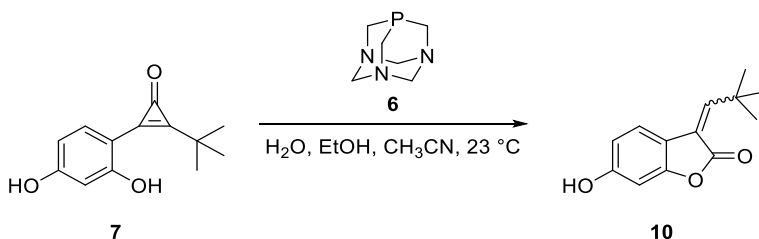

### 3-(2,2-Dimethylpropylidene)-6-hydroxybenzofuran-2(3H)-one (**10**)

Compound **7** (0.043 g, 0.20 mmol, 1.0 equiv.) was dissolved in a mixture of EtOH/H<sub>2</sub>O/CH<sub>3</sub>CN mixture (0.50 mL EtOH, 0.40 mL H<sub>2</sub>O, 3.6 mL CH<sub>3</sub>CN, 0.044 M) in a scintillation vial with a stir bar. PTA (**6**, 0.062 g, 0.40 mmol, 2.0 equiv.) was added as a solid to the mixture, and the reaction was stirred at room temperature. The mixture was concentrated *in vacuo*. The crude residue was purified by flash chromatography (eluting with 20% EtOAc in hexanes) to yield compound **10** as a 1.1:1 mixture of stereoisomers (0.033 g, 77%) as a yellow oil.

<sup>1</sup>H NMR (400 MHz, CDCl<sub>3</sub>) δ (major stereoisomer) 7.25–7.20 (m, 1H), 6.90 (s, 1H), 6.72–6.66 (m, 2H), 6.65–6.58 (m, 2H), 1.39 (s, 9H). (minor stereoisomer) 7.57 (dd, *J* = 7.8, 1.1 Hz, 1H), 7.09 (s, 1H), 6.72–6.66 (m, 2H), 6.65–6.60 (m, 2H), 1.37 (s, 9H). <sup>13</sup>C NMR (126 MHz, CDCl<sub>3</sub>) δ (major stereoisomer) 170.7, 157.9, 155.8, 154.4, 127.4, 121.8, 117.8, 111.2, 98.9, 34.0, 29.3. (minor stereoisomer) 165.9, 157.5, 154.1, 154.0, 122.1, 120.4, 113.9, 111.4, 99.4, 33.3, 29.1. HRMS–ESI+ (*m/z*): [M+Na]<sup>+</sup> calcd for C<sub>13</sub>H<sub>14</sub>O<sub>3</sub>Na, 241.0841; found, 241.0846.

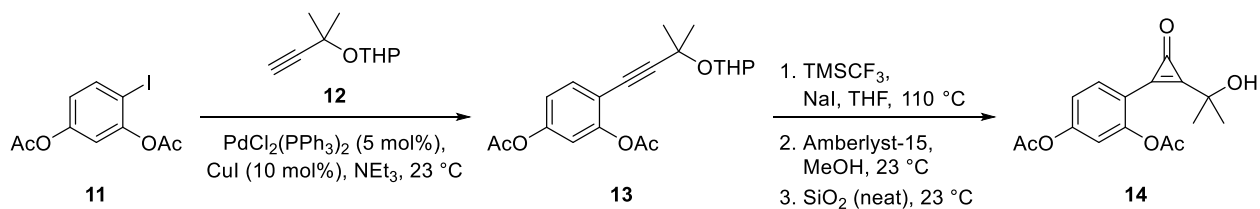

### 4-(2-(2-Hydroxypropan-2-yl)-3-oxocycloprop-1-en-1-yl)-1,3-phenylene diacetate (**14**)

4-Iodo-1,3-phenylene diacetate (**11**) and 2-((2-Methylbut-3-yn-2-yl)oxy)tetrahydro-2*H*-pyran (**12**) was prepared as previously described.<sup>19,28</sup> General procedure A was used with the following amounts of reagents: **11** (0.256 g, 0.790 mmol, 1.00 equiv.), Pd(PPh<sub>3</sub>)<sub>2</sub>Cl<sub>2</sub> (0.028 g, 0.040 mmol, 5.0 mol%), CuI, (0.016 g, 0.079 mmol, 10 mol%), **12** (0.239 g, 1.42 mmol, 2.00 equiv.), and anhydrous Et<sub>3</sub>N (7.0 mL, 0.11 M aryl iodide). The crude residue was purified with flash chromatography (eluting with 20% EtOAc in hexanes) to give compound **13** as an orange oil. This oil comprised the desired product **13** and the aryl

iodide starting material **11** (10 alkyne product **13** : 1 aryl iodide **11**, 0.22 g, 78%). The material was used without further purification.

To prepare CpO **14**, general procedure C was used with heating at 110 °C with the following amounts of reagents: **13** (0.18 g, 0.51 mmol, 1.0 equiv.), NaI (0.168 g, 1.12 mmol, 2.20 equiv.), TMSCF<sub>3</sub> (0.15 mL, 1.02 mmol, 2.0 equiv.), and anhydrous THF (6.0 mL, 0.085 M alkyne); Amberlyst-15 (70 mg) and anhydrous MeOH (8.0 mL, 0.064 M CpO); silica (3 g). The crude residue was purified with flash chromatography (eluting with EtOAc) to give compound **14** as a yellow oil (0.0042 g, 3%). An insufficient amount of material was isolated for <sup>13</sup>C NMR.

<sup>1</sup>H NMR (400 MHz, CDCl<sub>3</sub>) δ 8.11 (d, *J* = 8.5 Hz, 1H), 7.14 (ddd, *J* = 8.5, 2.2, 1.0 Hz, 1H), 7.06 (dd, *J* = 2.2, 0.6 Hz, 1H), 2.50 (s, 3H), 2.32 (s, 3H), 1.64 (s, 6H). HRMS–ESI+ (*m/z*): [M+Na]<sup>+</sup> calcd for C<sub>16</sub>H<sub>16</sub>O<sub>6</sub>Na, 327.0845; found, 327.0859.

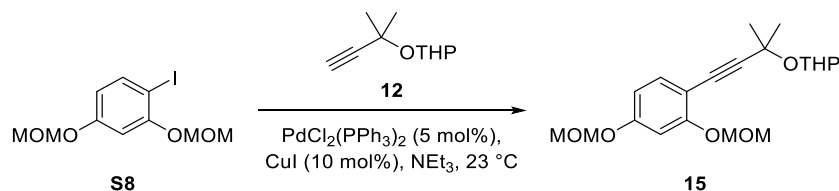

### 2-((4-(2,4-Bis(methoxymethoxy)phenyl)-2-methylbut-3-yn-2-yl)oxy)tetrahydro-2H-pyran (**15**)

1-Iodo-2,4-bis(methoxymethoxy)benzene (**S8**) was prepared as previously described.<sup>24</sup> General procedure A was used with the following amounts of reagents: **S8** (0.199 g, 0.614 mmol, 1.00 equiv.), Pd(PPh<sub>3</sub>)<sub>2</sub>Cl<sub>2</sub> (0.022 g, 0.031 mmol, 5.0 mol%), CuI, (0.012 g, 0.061 mmol, 10.0 mol%), 3,3-dimethyl-1-butyn-1-yl tetrahydropyranyl ether (0.17 mL, 0.74 mmol, 1.2 equiv.), and anhydrous Et<sub>3</sub>N (6.1 mL, 0.10 M alkyne). The crude residue was purified with flash chromatography (eluting with 10% EtOAc in hexanes) to give compound **15** as an orange oil (0.18 g, 81%). This oil comprised the desired product **15** and the aryl iodide **S8** (9 alkyne **15** : 1 aryl iodide **S8**). The material was used without further purification.

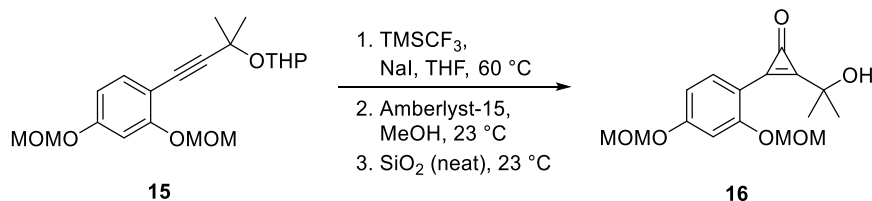

### 2-(2-(2,4-Bis(methoxymethoxy)phenyl)-3-(2-hydroxypropan-2-yl)cycloprop-2-en-1-one (**16**)

To prepare CpO **16**, general procedure C was used with heating at 60 °C with the following amounts of reagents: **15** (0.401 g, 1.10 mmol, 1.00 equiv.), NaI (0.363 g, 2.42 mmol, 2.20 equiv.), TMSCF<sub>3</sub> (0.33 mL, 2.2 mmol, 2.0 equiv.), and anhydrous THF (11.0 mL, 0.1 M alkyne); Amberlyst-15 (70 mg) and anhydrous MeOH (8.0 mL, 0.064 M CpO); silica (4 g). The crude residue was purified with flash chromatography (eluting with EtOAc) to give compound **16** as a yellow oil (0.12 g, 34% over two steps).

<sup>1</sup>H NMR (400 MHz, CDCl<sub>3</sub>) δ 7.84 (d, *J* = 8.6 Hz, 1H), 6.89 (d, *J* = 2.3 Hz, 1H), 6.79 (dd, *J* = 8.6, 2.3 Hz, 1H), 5.35 (s, 2H), 5.22 (s, 2H), 4.30 (s, 1H), 3.54 (s, 3H), 3.48 (s, 3H), 1.62 (s, 6H). <sup>13</sup>C NMR (151 MHz, CDCl<sub>3</sub>) δ 162.8, 157.1, 155.2, 153.3, 146.9, 136.7, 109.9, 107.2, 103.1, 95.19, 94.4, 70.2, 57.1, 56.6, 28.8. HRMS–ESI+ (*m/z*): [M+Na]<sup>+</sup> calcd for C<sub>16</sub>H<sub>20</sub>O<sub>6</sub>Na, 309.1338; found, 309.1325.

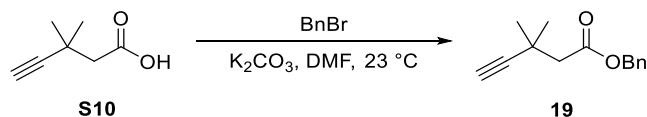

### Benzyl 3,3-dimethylpent-4-ynoate (**19**)

To an oven-dried round-bottom flask with a stir bar was added **S10** (0.279 g, 2.21 mmol, 1.00 equiv.) and anhydrous DMF (6.0 mL, 0.37 M alkyne). Ground and dried  $\text{K}_2\text{CO}_3$  (0.468 g, 3.39 mmol, 1.53 equiv.) and BnBr (0.31 mL, 2.6 mmol, 1.2 equiv.) were added. The mixture was stirred at ambient temperature overnight. Water (20 mL) was then added and the mixture was extracted into EtOAc (3 x 20 mL). The combined organic layers were washed with brine (1 x 40 mL), dried with  $\text{Na}_2\text{SO}_4$ , filtered, and concentrated *in vacuo*. The crude residue was purified by flash chromatography (eluting with 5%  $\text{Et}_2\text{O}$  in hexanes) to afford **19** as an off-clear oil (0.32 g, 71%).

$^1\text{H}$  NMR (500 MHz,  $\text{CDCl}_3$ )  $\delta$  7.42–7.31 (m, 5H), 5.15 (s, 2H), 2.53 (s, 2H), 2.14 (s, 1H), 1.37 (s, 6H).  $^{13}\text{C}$  NMR (151 MHz,  $\text{CDCl}_3$ )  $\delta$  170.7, 136.1, 128.7, 128.5, 128.3, 90.2, 68.6, 66.4, 47.0, 29.9, 29.3. HRMS–ESI+ ( $m/z$ ):  $[\text{M}+\text{Na}]^+$  calcd for  $\text{C}_{14}\text{H}_{16}\text{O}_2\text{Na}$ , 239.1048; found, 239.1050.

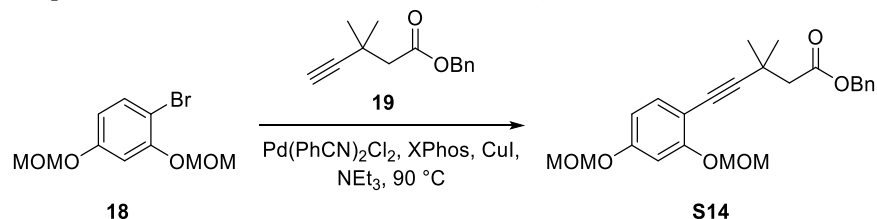

### Benzyl 5-(2,4-bis(methoxymethoxy)phenyl)-3,3-dimethylpent-4-ynoate (**S14**)

Compound **18** was prepared as previously described.<sup>19</sup> To an oven-dried Schlenk tube with a stir bar was added  $\text{Pd(PhCN)}_2\text{Cl}_2$  (0.372 g, 0.970 mmol, 50.0 mol%), XPhos (0.920 g, 1.93 mmol, 100 mol%), and CuI (0.184 g, 0.97 mmol, 100 mol%), and **18** (0.532 g, 1.93 mmol, 1.00 equiv.) in a solution of anhydrous  $\text{NEt}_3$  (15.4 mL, 0.125 M aryl bromide.). Alkyne **19** (0.624 g, 2.89 mmol, 1.50 equiv.) was added in a solution of anhydrous  $\text{NEt}_3$  (4.6 mL, 0.20 M alkyne). The vessel was sealed and heated at 90 °C overnight. After cooling to ambient temperature, the resultant slurry was diluted with saturated  $\text{NH}_4\text{Cl}$  (20 mL) and extracted into EtOAc (3 x 20 mL). The organic layers were combined and dried with  $\text{Na}_2\text{SO}_4$ , filtered, and concentrated *in vacuo*. The crude residue was purified by flash chromatography (eluting with 15% EtOAc in hexanes) to afford an orange oil (0.79 g, 89%).

$^1\text{H}$  NMR (500 MHz,  $\text{CDCl}_3$ )  $\delta$  7.38–7.29 (m, 1H), 7.21 (d,  $J = 8.5$  Hz, 1H), 6.74 (d,  $J = 1.7$  Hz, 1H), 6.63 (dd,  $J = 8.5, 1.8$  Hz, 1H), 5.18 (s, 2H), 5.16–5.14 (m, 4H), 3.50 (s, 3H), 3.48 (s, 3H), 2.62 (s, 2H), 1.45 (s, 6H).  $^{13}\text{C}$  NMR (151 MHz,  $\text{CDCl}_3$ )  $\delta$  170.9, 158.8, 158.0, 136.1, 134.3, 128.6, 128.4, 128.2, 109.6, 108.3, 105.0, 98.4, 95.5, 94.6, 66.3, 56.4, 56.3, 47.5, 30.9, 29.5. HRMS–ESI+ ( $m/z$ ):  $[\text{M}+\text{Na}]^+$  calcd for  $\text{C}_{24}\text{H}_{28}\text{O}_6\text{Na}$ , 435.1783; found, 435.1794.

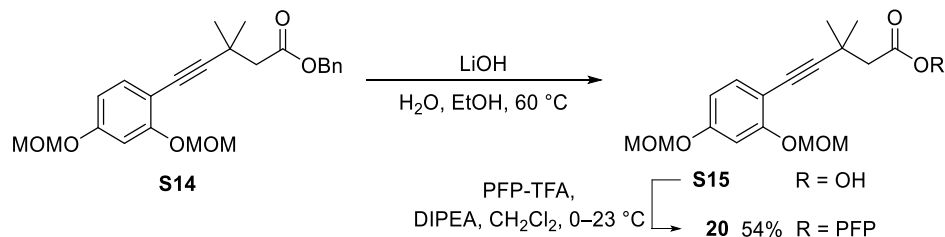

### Perfluorophenyl 5-(2,4-bis(methoxymethoxy)phenyl)-3,3-dimethylpent-4-ynoate (**20**)

To an oven-dried round-bottom flask with a stir bar was added **S14** (0.713 g, 1.72 mmol, 1.00 equiv.), LiOH in water (0.40 M, 6.5 mL, 2.6 mmol, 1.5 equiv.), and EtOH (17 mL, 0.10 M aryl alkyne). The mixture was heated overnight at 60 °C. After cooling to ambient temperatures, the ethanol was removed by concentration *in vacuo*. The crude reaction mixture was then acidified to pH 1 using 2 N HCl and extracted into EtOAc (3 x 20 mL). The organic layers were combined and dried with Na<sub>2</sub>SO<sub>4</sub>, filtered, and concentrated *in vacuo*. The crude residue was purified by flash column chromatography (eluting with 0.1% AcOH in 30% EtOAc in hexanes) to give the corresponding carboxylic acid (**S15**) as a yellow solid. This material was used directly in the next step without further purification.

To an oven-dried round-bottom flask with a stir bar was added **S15** (0.493 g, 1.53 mmol, 1.0 equiv.), DIPEA (0.53 mL, 3.1 mmol, 1.2 equiv.), and anhydrous CH<sub>2</sub>Cl<sub>2</sub> (5.0 mL, 0.30 M aryl alkyne). The solution was stirred under an atmosphere of N<sub>2</sub> and cooled in an ice bath. Pentafluorophenol trifluoroacetate (0.40 mL, 2.3 mmol, 1.5 equiv.) was added dropwise. The reaction was warmed to room temperature and stirred overnight. Excess solvent was removed *in vacuo*, and the crude reaction mixture was purified by flash column chromatography (eluting with 20% Et<sub>2</sub>O in hexanes) to give **20** as a yellow oil (0.45 g, 54% over 2 steps).

<sup>1</sup>H NMR (400 MHz, CDCl<sub>3</sub>) δ 7.27 (d, *J* = 8.3 Hz, 1H), 6.75 (d, *J* = 2.4 Hz, 1H), 6.65 (dd, *J* = 8.6, 2.2 Hz, 1H), 5.19 (s, 2H), 5.15 (s, 2H), 3.51 (s, 3H), 3.47 (s, 3H), 2.91 (s, 2H), 1.54 (s, 6H). <sup>19</sup>F NMR (376 MHz, CDCl<sub>3</sub>) δ -152.29 – -152.64 (m), -158.61 (t, *J* = 21.7 Hz), -162.93 (app tq, *J* = 8.9, 4.3 Hz). <sup>13</sup>C NMR (151 MHz, CDCl<sub>3</sub>) δ 166.6, 158.7, 158.1, 142.2–142.0 (m), 140.8–140.1, 139.3–138.2 (m), 137.6–136.8 (m), 134.2, 125.1 (app td, *J* = 14.5, 4.9 Hz), 109.6, 107.9, 104.8, 97.1, 95.3, 94.5, 77.3, 56.2, 56.1, 46.3, 30.9, 29.2. HRMS–ESI+ (*m/z*): [M+Na]<sup>+</sup> calcd for C<sub>23</sub>H<sub>21</sub>O<sub>6</sub>F<sub>5</sub>Na, 511.1156; found, 511.1150.

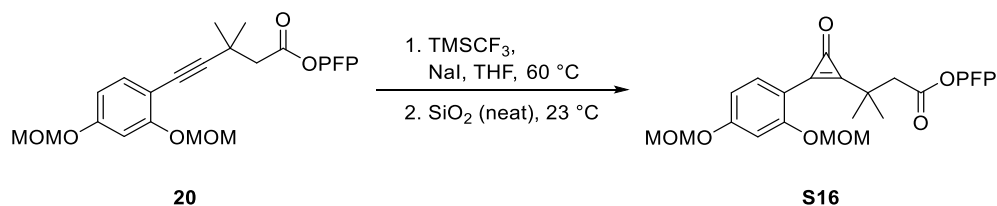

### Perfluorophenyl 3-(2-(2,4-bis(methoxymethoxy)phenyl)-3-oxocycloprop-1-en-1-yl)-3-methylbutanoate (**S16**)

General procedure B was used at 60 °C with the following reagents: **20** (0.25 g, 0.52 mmol), NaI (0.172 g, 1.13 mmol, 2.20 equiv.), TMSCF<sub>3</sub> (0.15 mL, 1.0 mmol, 2.0 equiv.), and anhydrous THF (5.3 mL, 0.099 M); silica (5 g). The crude residue was purified with flash chromatography (eluting with EtOAc) to give compound **S16** as a yellow oil (0.161 g, 60%).

$^1\text{H}$  NMR (400 MHz,  $\text{CDCl}_3$ )  $\delta$  7.72 (d,  $J = 8.6$  Hz, 1H), 6.91 (d,  $J = 2.2$  Hz, 1H), 6.79 (dd,  $J = 8.6, 2.2$  Hz, 1H), 5.35 (s, 2H), 5.22 (s, 2H), 3.53 (s, 3H), 3.49 (s, 3H), 3.18 (s, 2H), 1.61 (s, 6H).  $^{19}\text{F}$  NMR (376 MHz,  $\text{CDCl}_3$ )  $\delta$  -152.4 – -152.5 (m, 2F), -157.8 (t,  $J = 21.7$  Hz, 1F), -162.2 – -162.4 (m, 2F).  $^{13}\text{C}$  NMR (151 MHz,  $\text{CDCl}_3$ )  $\delta$  166.6, 162.8, 157.9, 157.0, 153.3, 149.0, 140.3 (m), 137.1 (m), 135.9, 135.5 (m), 124.8 (m), 109.5, 107.6, 103.1, 94.7, 94.4, 56.8, 56.6, 43.9, 35.9, 26.2. HRMS–ESI+ ( $m/z$ ):  $[\text{M}+\text{Na}]^+$  calcd for  $\text{C}_{24}\text{H}_{21}\text{O}_7\text{F}_5\text{Na}$ , 539.1105; found, 539.1103.

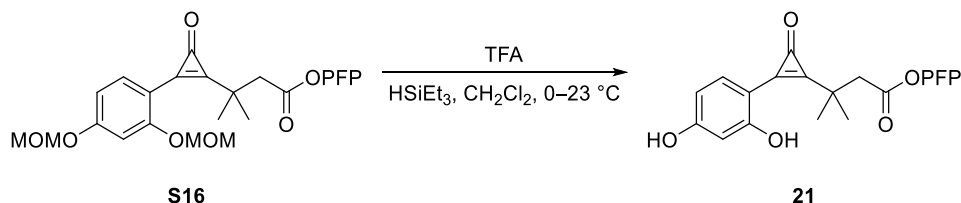

### Perfluorophenyl 3-(2-(2,4-dihydroxyphenyl)-3-oxocycloprop-1-en-1-yl)-3-methylbutanoate (**21**)

This compound was prepared following the general procedure of Luo *et al.* with some modifications.<sup>30</sup> To an oven-dried round bottom flask with a stir bar was added **S16** (0.020 g, 0.039 mmol, 1.0 equiv.) in anhydrous  $\text{CH}_2\text{Cl}_2$  (1.2 mL). Trifluoroacetic acid (TFA, 1.2 mL, 0.016 M CpO) and triethylsilane ( $\text{HSiEt}_3$ , 0.080 mL, 0.050 mmol, 13 equiv.) were added dropwise. The crude reaction mixture was concentrated *in vacuo*. The reaction was diluted with cold  $\text{CH}_2\text{Cl}_2$  (3 x 3 mL) and filtered. The filtrate was discarded, and the solid was rinsed with  $\text{CH}_3\text{CN}$  (3 x 3 mL). The filtrate was collected and concentrated *in vacuo* to give **21** as an orange solid. Compound **21** was used directly without further purification (0.016 g, 87%).

Reagent **21** underwent degradation to the free carboxylic acid in organic solution over time, preventing characterization by  $^{13}\text{C}$  NMR.

$^1\text{H}$  NMR (600 MHz,  $\text{CD}_3\text{CN}$ )  $\delta$  7.50 (d,  $J = 8.6$  Hz, 1H), 6.49 – 6.45 (m, 2H), 3.22 (s, 2H), 1.53 (s, 6H).  $^{19}\text{F}$  NMR (376 MHz,  $\text{CD}_3\text{CN}$ ) -154.6 – -154.7 (m, 2F), -160.5 – 160.6 (m, 1F), -164.7 – -164.9 (m, 2F). HRMS–ESI+ ( $m/z$ ):  $[\text{M}+\text{H}]^+$  calcd for  $\text{C}_{20}\text{H}_{14}\text{O}_5\text{F}_5$ , 429.0761; found, 429.0772.

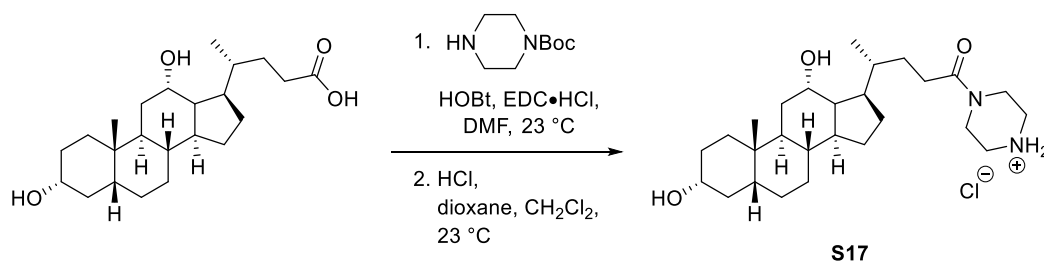

### Deoxycholate-piperazine conjugate (**S17**)

To a flame-dried round bottom flask with a stir bar was added sodium deoxycholate (0.300 g, 0.720 mmol, 1.00 equiv.) in anhydrous DMF (10 mL, 0.072 M). HOBt (0.108 g, 0.800 mmol, 1.10 equiv.), EDC·HCl (207 mg, 1.08 mmol, 1.50 equiv.) were added and the solution was stirred at room temperature for 30 min. 1-Boc-piperazine (0.135 mg, 0.720 mmol, 1.00 equiv.) was added dropwise in anhydrous DMF (5.0 mL, 0.048 M sodium deoxycholate) and stirred at room temperature overnight. The reaction was diluted with EtOAc (50 mL) and washed with  $\text{H}_2\text{O}$  (3 x 50 mL). The organic layer was dried with anhydrous  $\text{MgSO}_4$ , filtered, and concentrated *in vacuo*. The resulting solid was redissolved in anhydrous  $\text{CH}_2\text{Cl}_2$  (5 mL)



followed by addition of 4 N HCl in dioxane (10 mL) and stirred at room temperature for 2 h. Solvent was removed *in vacuo* to afford **S17** as a white solid (235 mg, 71%).

$^1\text{H}$  NMR (600 MHz,  $\text{CD}_3\text{OD}$ )  $\delta$  3.97–3.95 (m, 1H), 3.80–3.73 (m, 4H), 3.58–3.49 (m, 1H), 3.21–3.17 (m, 2H), 3.15–3.11 (m, 2H), 2.52–2.47 (m, 1H), 2.40–2.30 (m, 1H), 1.96–1.69 (m, 7H), 1.68–1.24 (m, 14H), 1.04 (d,  $J = 6.6$  Hz, 3H), 0.99 (td,  $J = 14.1, 3.2$  Hz, 1H), 0.93 (s, 3H), 0.72 (s, 3H).  $^{13}\text{C}$  NMR (151 MHz,  $\text{CD}_3\text{OD}$ )  $\delta$  173.4, 72.7, 71.1, 46.6, 46.2, 43.6, 43.4, 43.0, 42.2, 38.8, 36.1, 35.8, 35.5, 35.0, 33.9, 33.4, 31.0, 29.7, 29.3, 28.5, 27.3, 27.0, 26.1, 23.5, 22.3, 16.3, 11.8. HRMS–ESI+ ( $m/z$ ):  $[\text{M}+\text{H}]^+$  calcd for  $\text{C}_{28}\text{H}_{49}\text{N}_2\text{O}_3\text{Na}$ , 461.3743; found, 461.3721.

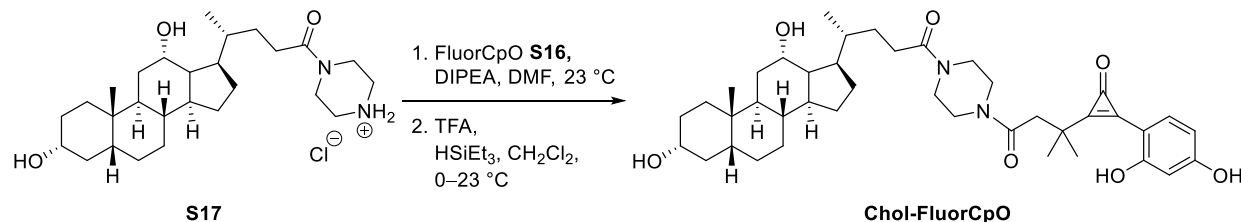

### Deoxycholate-FluorCpO probe (DCA-FluorCpO)

To a flame-dried round bottomed flask with a stir bar was added **S17** (0.057 g, 0.12 mmol, 1.2 equiv.) dissolved in anhydrous DMF (2.0 mL, 0.060 M). DIPEA (0.07 mL, 0.4 mmol, 4 equiv.) was added, then a solution of **S16** (0.051 g, 0.090 mmol, 1.0 equiv.) in anhydrous DMF (2.0 mL, 0.030 M) was added dropwise. The reaction was stirred at room temperature overnight. The following day, the solvent was removed under reduced pressure, and the crude residue was purified by flash chromatography (eluting with 10% MeOH in  $\text{CH}_2\text{Cl}_2$ ). The purified residue was dissolved in anhydrous  $\text{CH}_2\text{Cl}_2$  (3.0 mL) and cooled to 0 °C. Trifluoroacetic acid (TFA, 3.0 mL) and triethylsilane ( $\text{HSiEt}_3$ , 0.05 mL, 0.32 mmol, 3.2 equiv.) were then added dropwise, and the solution was allowed to warm to room temperature over 1.5 h with stirring. The solvent was removed *in vacuo*, and the crude residue was triturated with cold n-pentane (3 x 5 mL) and washed with  $\text{CH}_2\text{Cl}_2$  (6 x 10 mL). The filtrate was discarded, and the remaining solid was dissolved in MeOH and concentrated to give **DCA-FluorCpO** as a white solid (27 mg, 38% over two steps). A portion of the material was analyzed by HPLC (see Figure S11).

$^1\text{H}$  NMR (600 MHz,  $\text{CD}_3\text{OD}$ )  $\delta$  7.55 (d,  $J = 8.1$  Hz, 1H), 6.41 (d,  $J = 10.0$  Hz, 1H), 6.38 (s, 1H), 3.98 (s, 1H), 3.65–3.46 (m, 9H), 3.01 (s, 1H), 2.99 (s, 1H), 2.47 (m, 1H), 2.33 (m, 1H), 1.99–1.56 (m, 10H), 1.54–1.06 (m, 14H), 1.06–0.91 (m, 7H), 0.72 (m, 3H). HRMS–ESI+ ( $m/z$ ):  $[\text{M}+\text{H}]^+$  calcd for  $\text{C}_{42}\text{H}_{61}\text{N}_2\text{O}_7$ , 705.4479; found, 705.4459.

### References

- García-Domínguez, A.; West, T. H.; Primožic, J. J.; Grant, K. M.; Johnston, C. P.; Cumming, G. G.; Leach, A. G.; Lloyd-Jones, G. C. Difluorocarbene Generation from  $\text{TMSCF}_3$ : Kinetics and Mechanism of NaI-Mediated and Si-Induced Anionic Chain Reactions. *J. Am. Chem. Soc.* **2020**, *142*, 14649–14663.
- Reber, K. P.; Gilbert, I. W.; Strassfeld, D. A.; Sorensen, E. J. Synthesis of (+)-Lineariifolianone and Related Cyclopropanone-Containing Sesquiterpenoids. *J. Org. Chem.* **2020**, *84*, 5524–5534.

3. Shih, H.-W.; Prescher, J. A. A Bioorthogonal Ligation of Cyclopropenones Mediated by Triarylphosphines. *J. Am. Chem. Soc.* **2016**, *137*, 10036–10039.
4. Row, R. D.; Shih, H.-W.; Alexander, A. T.; Mehl, R. A.; Prescher, J. A. Cyclopropenones for Metabolic Targeting and Sequential Bioorthogonal Labeling. *J. Am. Chem. Soc.* **2020**, *139*, 7370–7375.
5. Wang, X.; Liu, Y.; Fan, X.; Wang, J.; Ngai, W. S. C.; Zhang, H.; Li, J.; Zhang, G.; Lin, J.; Chen, P. R. Copper-Triggered Bioorthogonal Cleavage Reactions for Reversible Protein and Cell Surface Modifications. *J. Am. Chem. Soc.* **2019**, *141*, 17133–17141.
6. Gilmore, K.; Alabugin, I. V. Cyclization of Alkynes: Revisiting Baldwin's Rules for Ring Closure. *Chem. Rev.* **2011**, *111*, 6513–6556.
7. Dorel, R.; Echavarren, A. M.; Gold(I)-Catalyzed Activation of Alkynes for the Construction of Molecular Complexity. *Chem. Rev.* **2015**, *115*, 9028–9072.
8. Jin, C.; Yan, Z.; Sun, B.; Yang, J. Visible-light-induced Regioselective Alkylation of Coumarins via Decarboxylative Coupling with *N*-Hydroxyphthalimide Esters. *Org. Lett.* **2019**, *21*, 2064–2068.
9. Mandal, S.; Mahato, S.; Jana, C. K. Direct  $\beta$ -C(sp<sup>3</sup>)-H Functionalization of Aliphatic Amines to  $\alpha,\beta$ -Unsaturated Imines, Aldehydes, and Chromenes. *Org. Lett.* **2015**, *17*, 3762–3765.
10. Reber, K. P.; Gilbert, I. W.; Strassfeld, D. A.; Sorensen, E. J. Synthesis of (+)-Lineariifolianone and Related Cyclopropenone-Containing Sesquiterpenoids. *J. Org. Chem.* **2019**, *84*, 5524–5534.
11. Lemieux, G. A.; de Graffenried, C. L.; Bertozzi, C. R. A Fluorogenic Dye Activated by the Staudinger Ligation. *J. Am. Chem. Soc.* **2003**, *125*, 4708–4709.
12. Row, R. D.; Prescher, J. A. A Cyclopropenethione-Phosphine Ligation for Biomolecule Labeling. *Org. Lett.* **2018**, *20*, 5614–5617.
13. Shih, H.-W.; Prescher, J. A. A Bioorthogonal Ligation of Cyclopropenones Mediated by Triarylphosphines. *Journal of the American Chemical Society* **2015**, *137*, 10036–10039.
14. Hermanson, G. T., *Bioconjugate Techniques*. Academic Press: San Diego, 1996.
15. Carlson, J. C. T.; Meimetis, L. G.; Hilderbrand, S. A.; Weissleder, R. BODIPY-Tetrazine Derivatives as Superbright Bioorthogonal Turn-On Probes. *Angew. Chem. Int. Ed.* **2013**, *52*, 6917–6920.
16. Gibson, D. G.; Young, L.; Chuang, R.-Y.; Venter, J. C.; Hutchison, C. A.; Smith, H. O. Enzymatic Assembly of DNA Molecules up to Several Hundred Kilobases. *Nat. Methods* **2009**, *6*, 343–345.
17. Farrants, H.; Tarnawski, M.; Müller, T. G.; Otsuka, S.; Hiblot, J.; Koch, B.; Kueblbeck, M.; Kräusslich, H. G.; Ellenberg, J.; Johnsson, K. Chemogenetic Control of Nanobodies. *Nat. Methods* **2020**, *17*, 279–282.
18. Row, R. D.; Nguyen, S. S.; Ferreira, A. J.; Prescher, J. A. Chemically Triggered Crosslinking with Bioorthogonal Cyclopropenones. *Chem. Commun.* **2020**, *56*, 10883–10886.
19. Anslam, S. N.; Stevenson, P. C.; Phythian, S. J.; Veitch, N. C.; Hall, D. R. Synthesis of Cicerfuran, an Antifungal Benzofuran, and Some Related Analogues. *Tetrahedron* **2006**, *62*, 4124–4226.

20. Bertrand, P.; Gesson, J. P. Click Chemistry with *O*-Dimethylpropargylcarbamate for Preparation of pH-sensitive Functional Groups. A Case Study. *J. Org. Chem.* **2007**, *72*, 3596–3299.
21. Liu, Y.; Ma, S. Benzofurans or Isochromenes via the Ring-opening Cyclization of Cyclopropene Derivatives with Organolithiums. *Org. Lett.* **2012**, *14*, 720–723.
22. Boyer, A.; Isono, N.; Lackner, S.; Lautens, M. Domino Rhodium(I)-Catalysed Reactions for the Efficient Synthesis of Substituted Benzofurans and Indoles. *Tetrahedron* **2010**, *66*, 6468–6482.
23. Nicolosi, G.; Piatelli, M.; Sanfilippo, C. Lipase-catalyzed Regioselective Protection of Hydroxyl groups in Aromatic Dihydroxyaldehydes and Ketones. *Tetrahedron* **1993**, *49*, 3143–3148.
24. Mamoalosi, S. A.; Drewes, S. E.; Van Heerden, F. R. Total Synthesis of the Pyranocoumaronochromone Lupinalbin H. *Tetrahedron* **2011**, *67*, 8654–8658.
25. McCourt, R. O.; Dénès, F.; Sanchez-Sanz, G.; Scanlan, E. M. Rapid Access to Thiolactone derivatives through Radical-Mediated Acyl Thiol-ene and acyl Thiol-yne Cyclization. *Org. Lett.* **2018**, *20*, 2948–2951.
26. Ramil, C. P.; Dong, M.; An, P.; Lewandowski, T. M.; Yu, Z.; Miller, L. J.; Lin, Q. Spirohexene-Tetrazine Ligation Enables Bioorthogonal Labeling of Class B G Protein-Coupled Receptors in Live Cells. *J. Am. Chem. Soc.* **2017**, *139*, 13376–13386.
27. Erdmann, R. S.; Takakura, H.; Thompson, A. D.; Rivera-Molina, F.; Allgeyer, E. S.; Bewersdorf, J.; Toomre, D.; Schepartz, A. Super-Resolution Imaging of the Golgi in Live Cells with a Bioorthogonal Ceramide Probe. *Angew. Chem. Int. Ed.* **2014**, *53*, 10242–10246.
28. Hou, J.; Ee, A.; Feng, W.; Xu, J. H.; Zhao, Y.; Wu, J. Visible-light-driven Alkyne Hydro-/carboxylation Using CO<sub>2</sub> via Iridium/cobalt Dual catalysis for Divergent Heterocycle Synthesis. *J. Am. Chem. Soc.* **2018**, *140*, 5257–5263.
29. Phillips, C.; Jacobson, R.; Abrahams, B.; Williams, H. J.; Smith, L. R. Useful Route to 1,6-Dioxaspiro[4.4]nonane and 1,6-Dioxaspiro[4.5]decane Derivatives. *J. Org. Chem.* **1980**, *45*, 1920–1924.
30. Luo, J.; Uprety, R.; Naro, Y.; Chou, C.; Nguyen, D. P.; Chin, J. W.; Deiters, A. Genetically Encoded Optochemical Probes for Simultaneous Fluorescence Reporting and Light Activation of Protein Function with Two-Photon Excitation. *J. Am. Chem. Soc.* **2014**, *136*, 15551–15558.

# NMR spectra

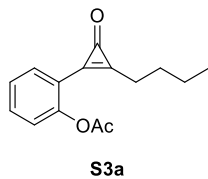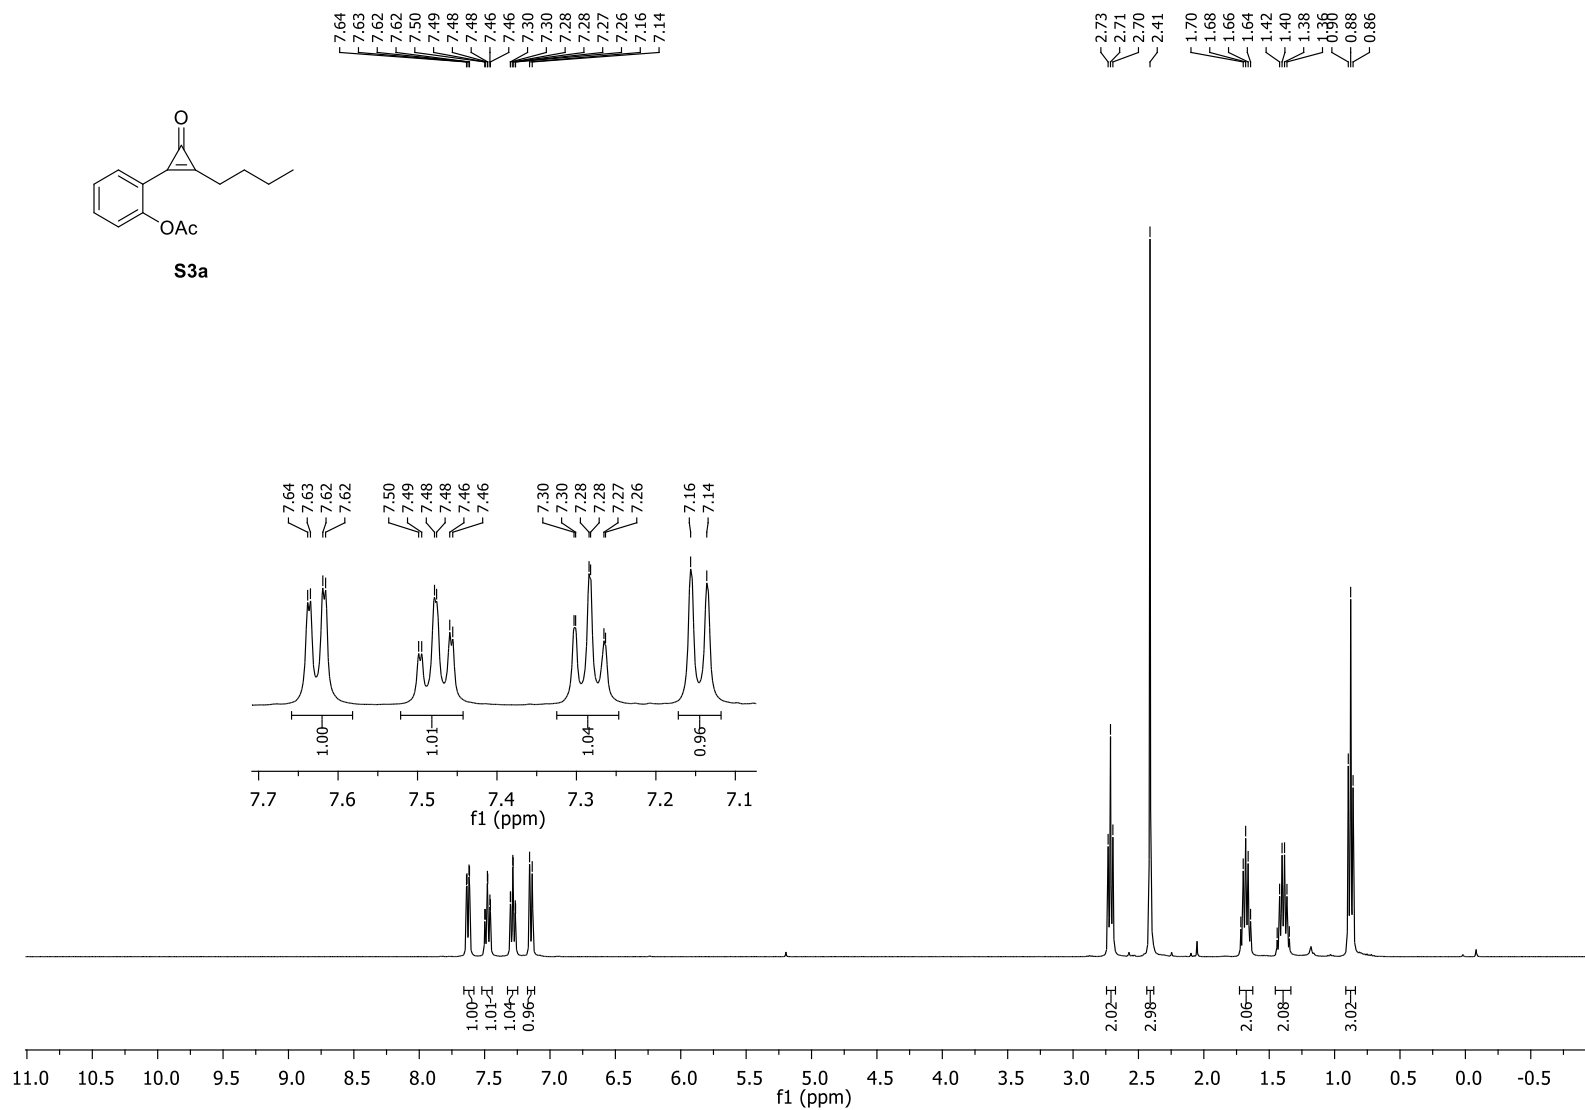

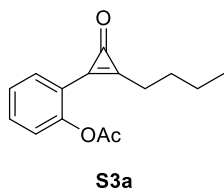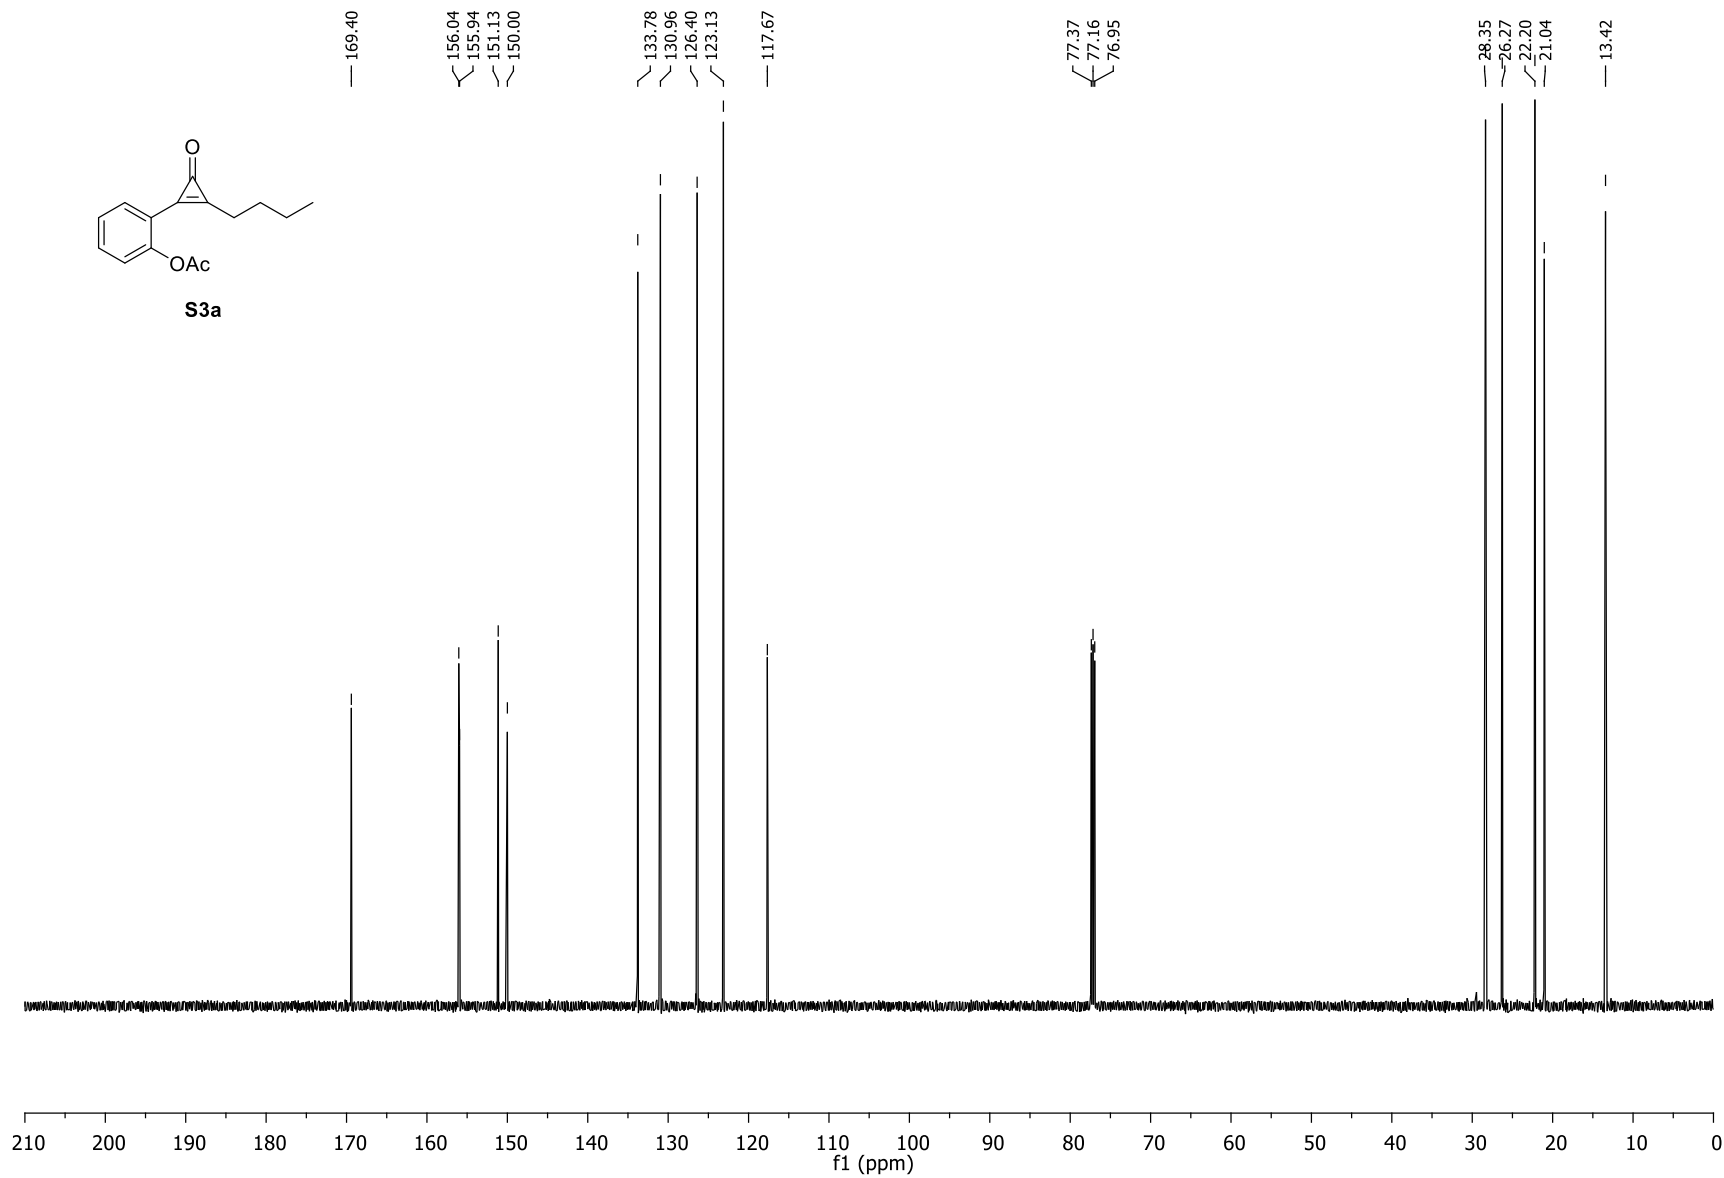

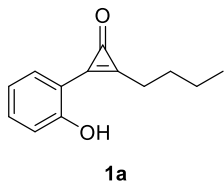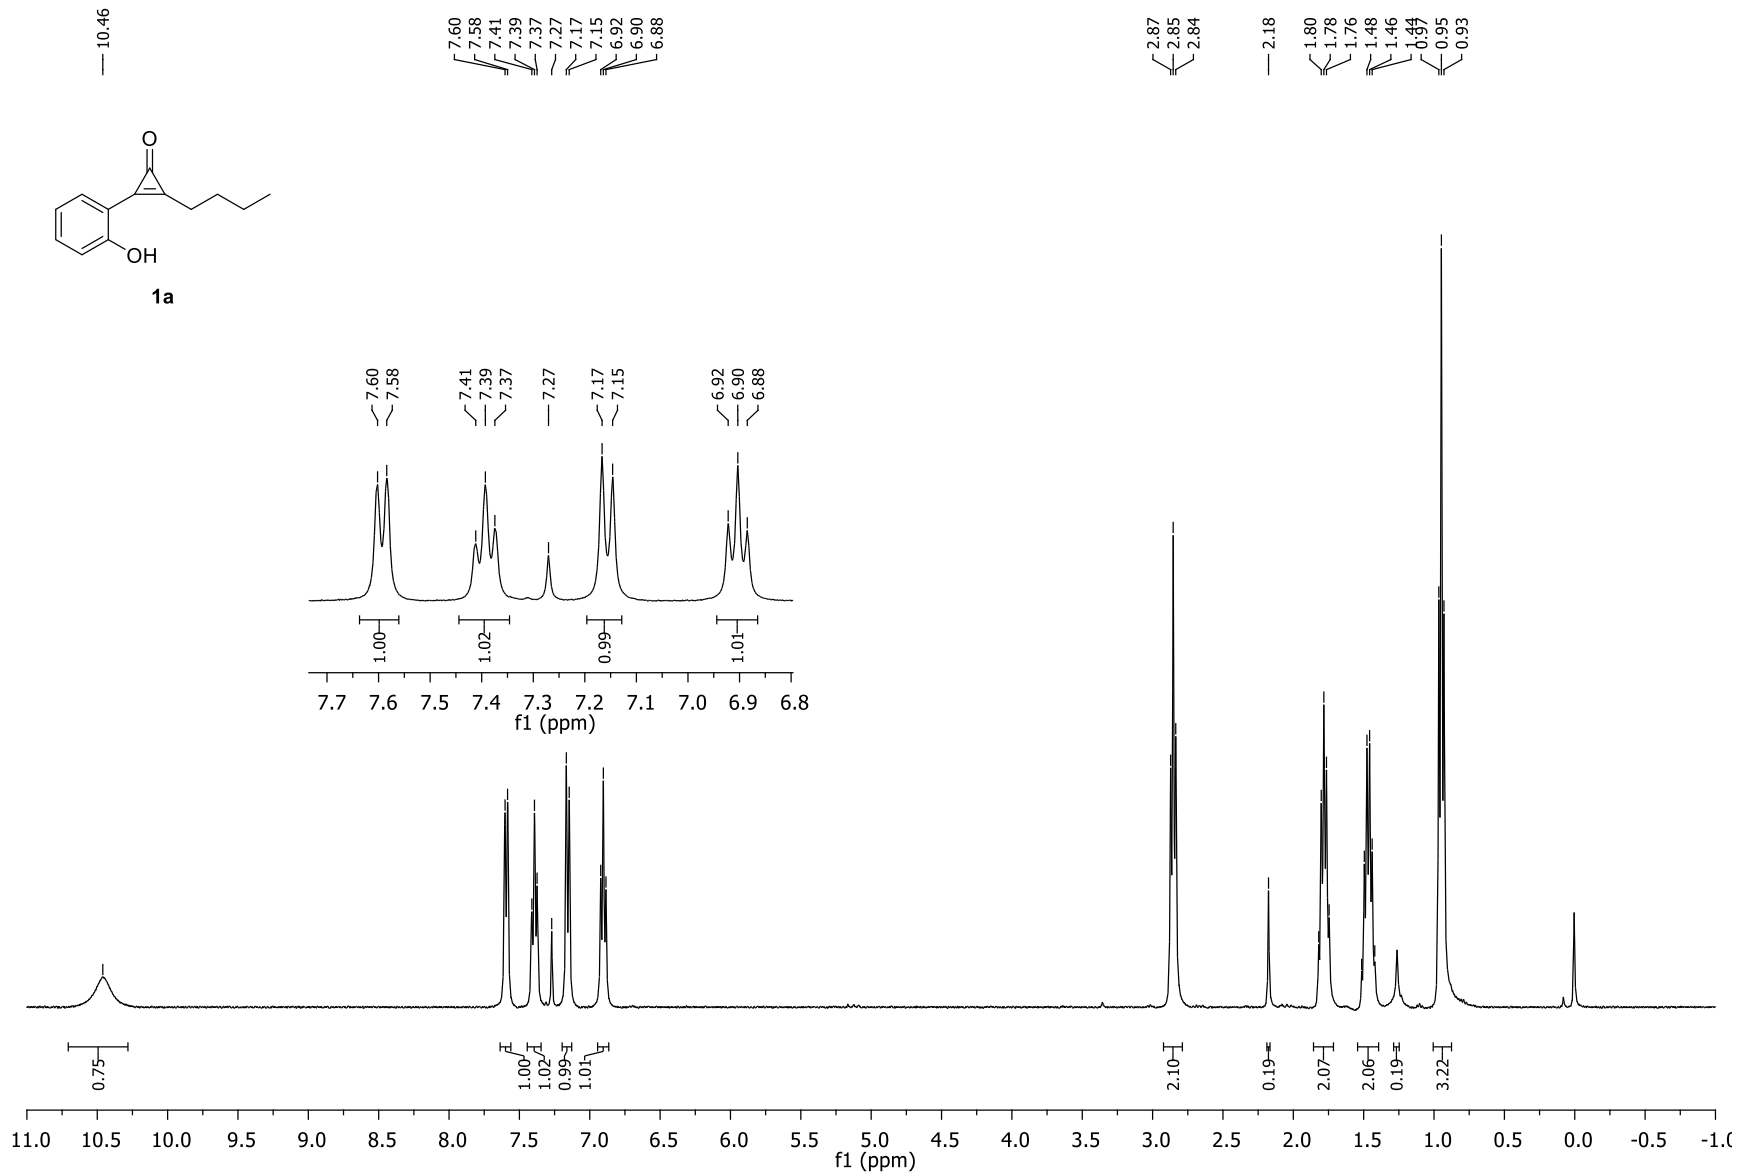

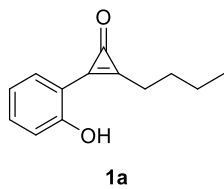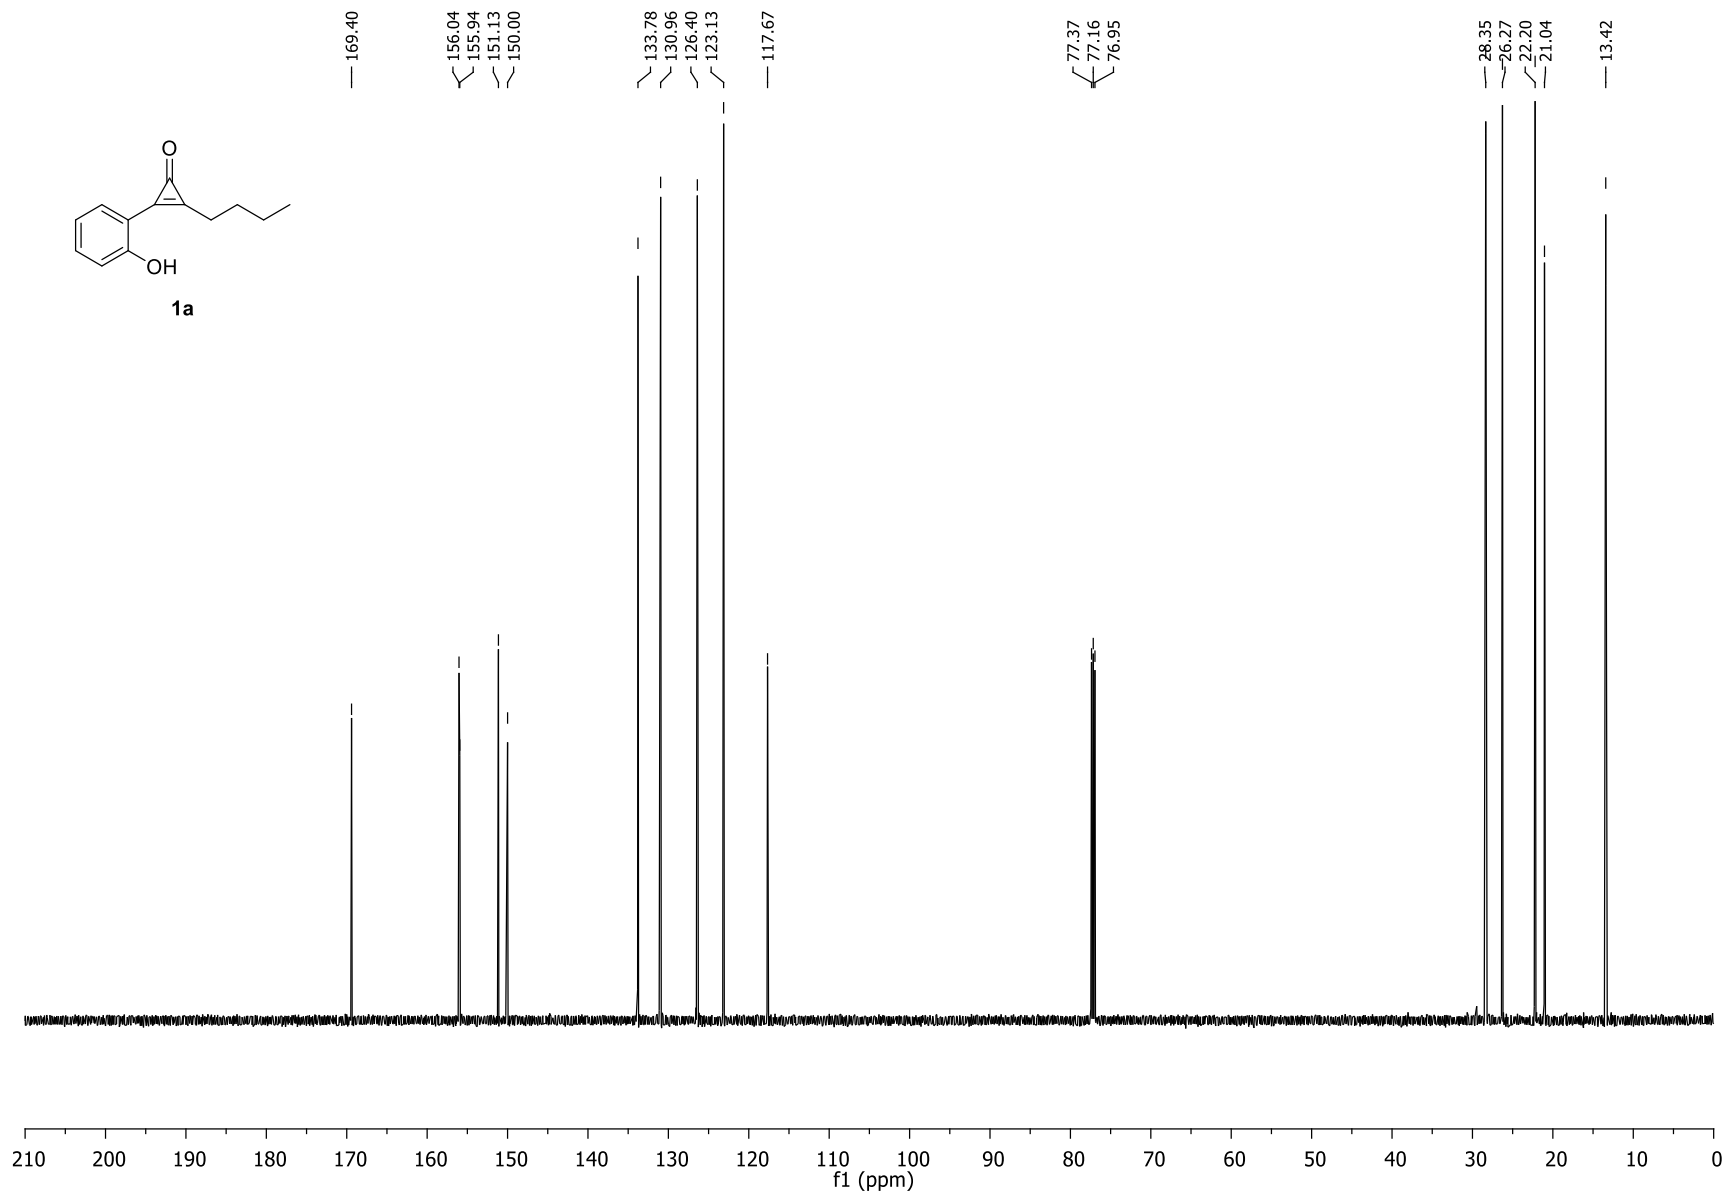

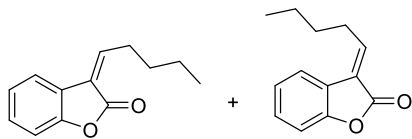

3a

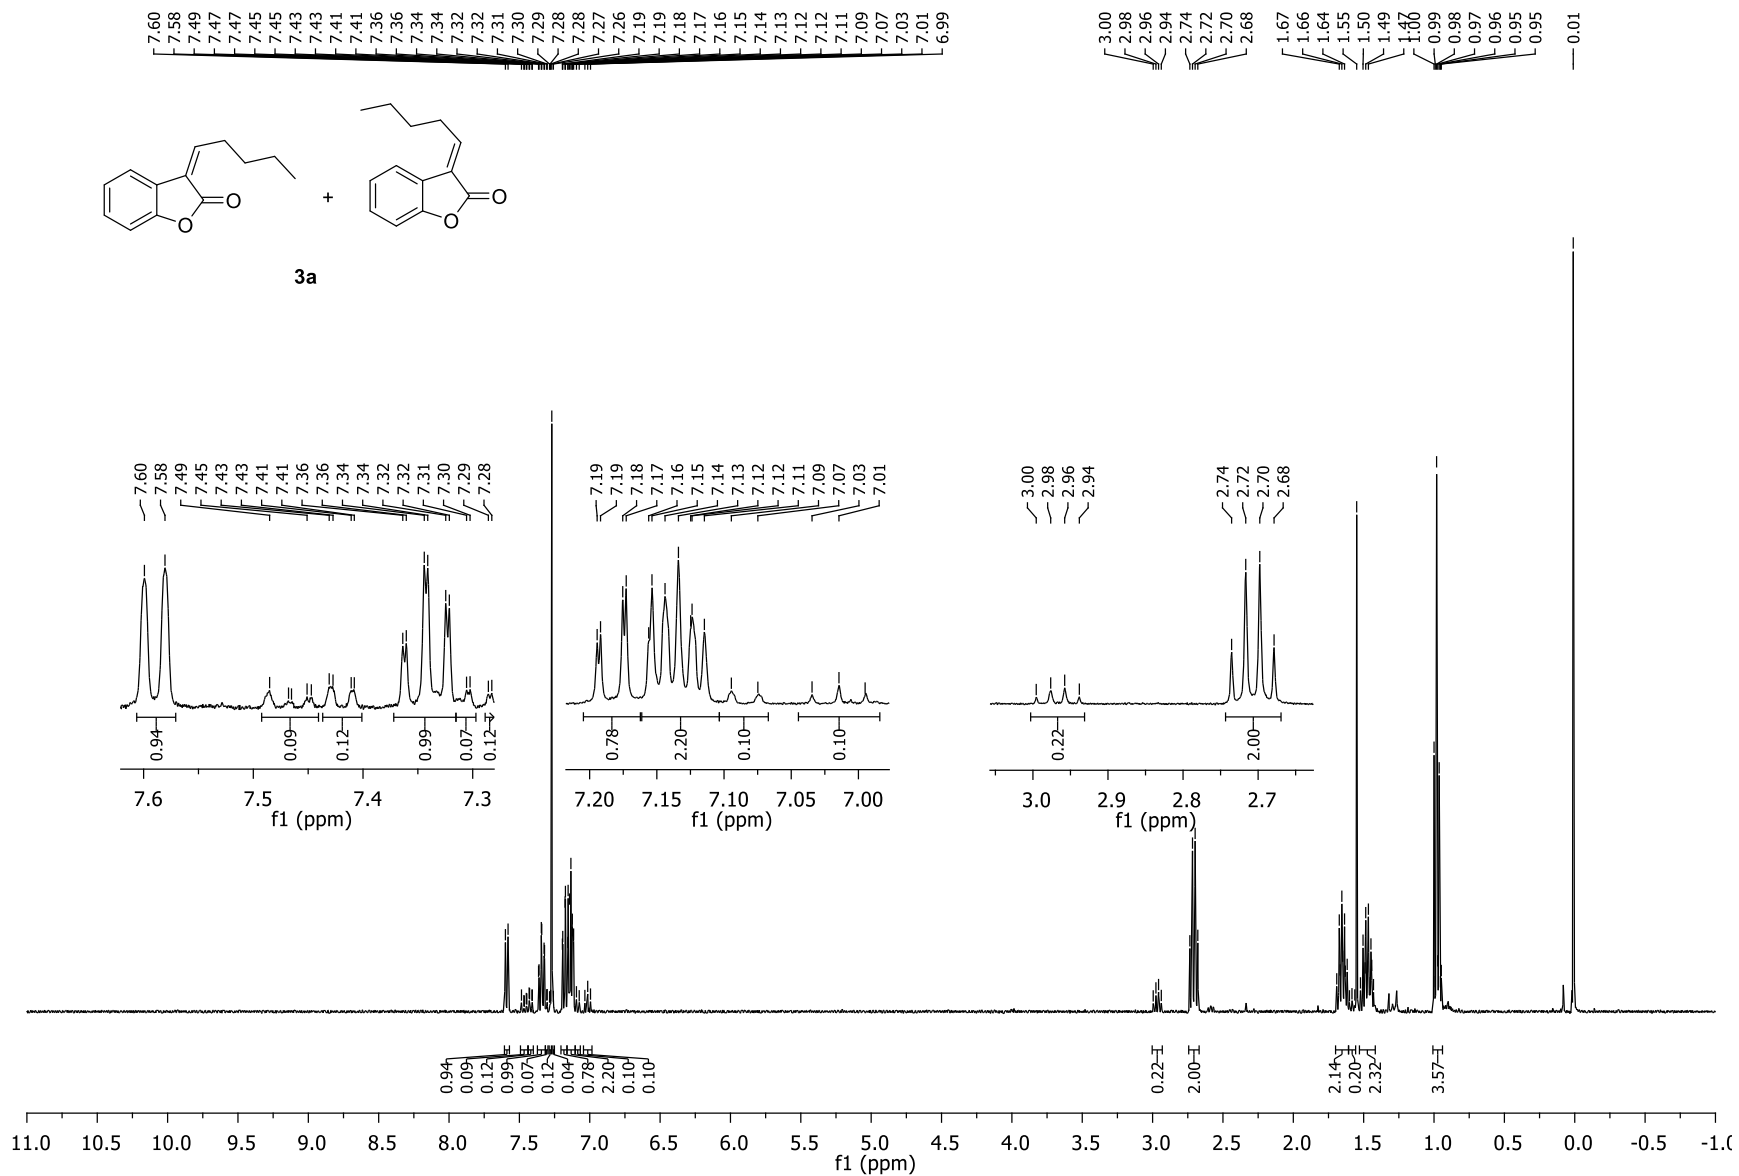



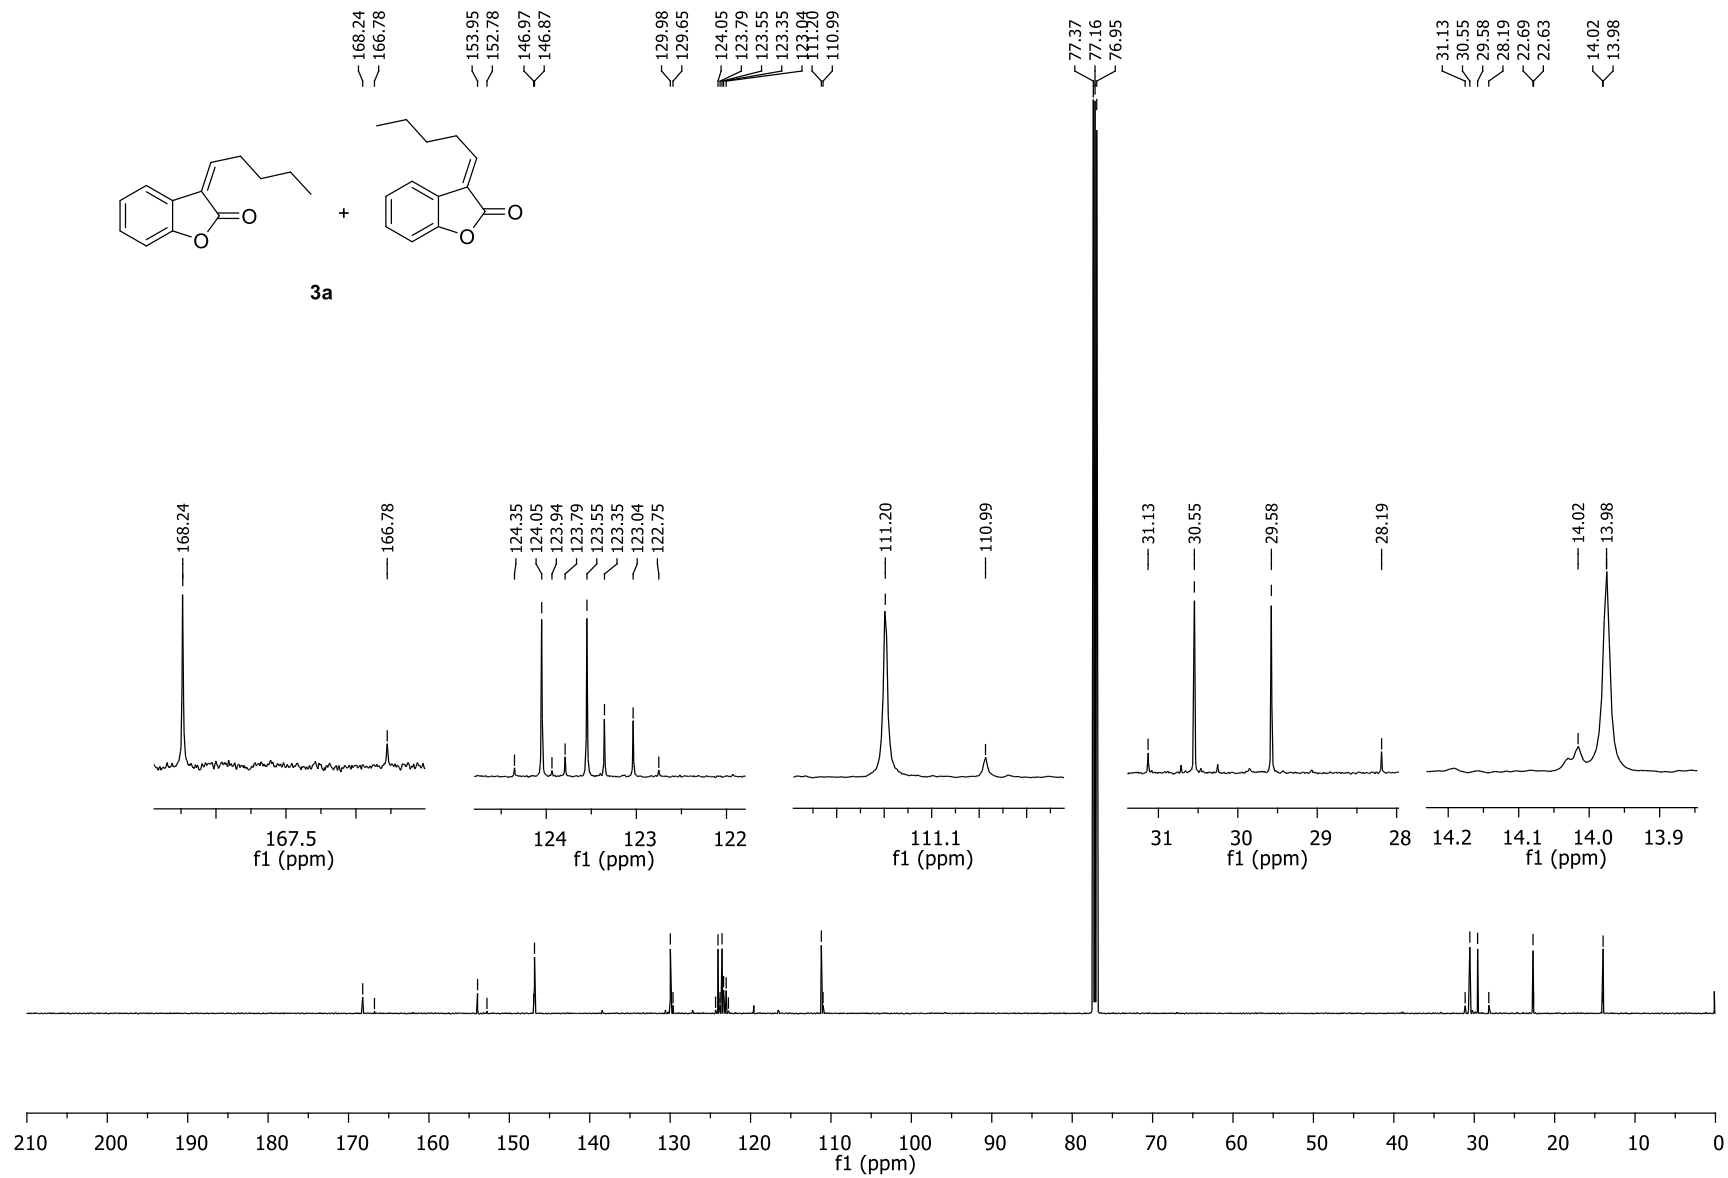

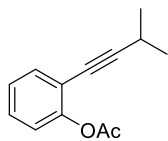

S2b

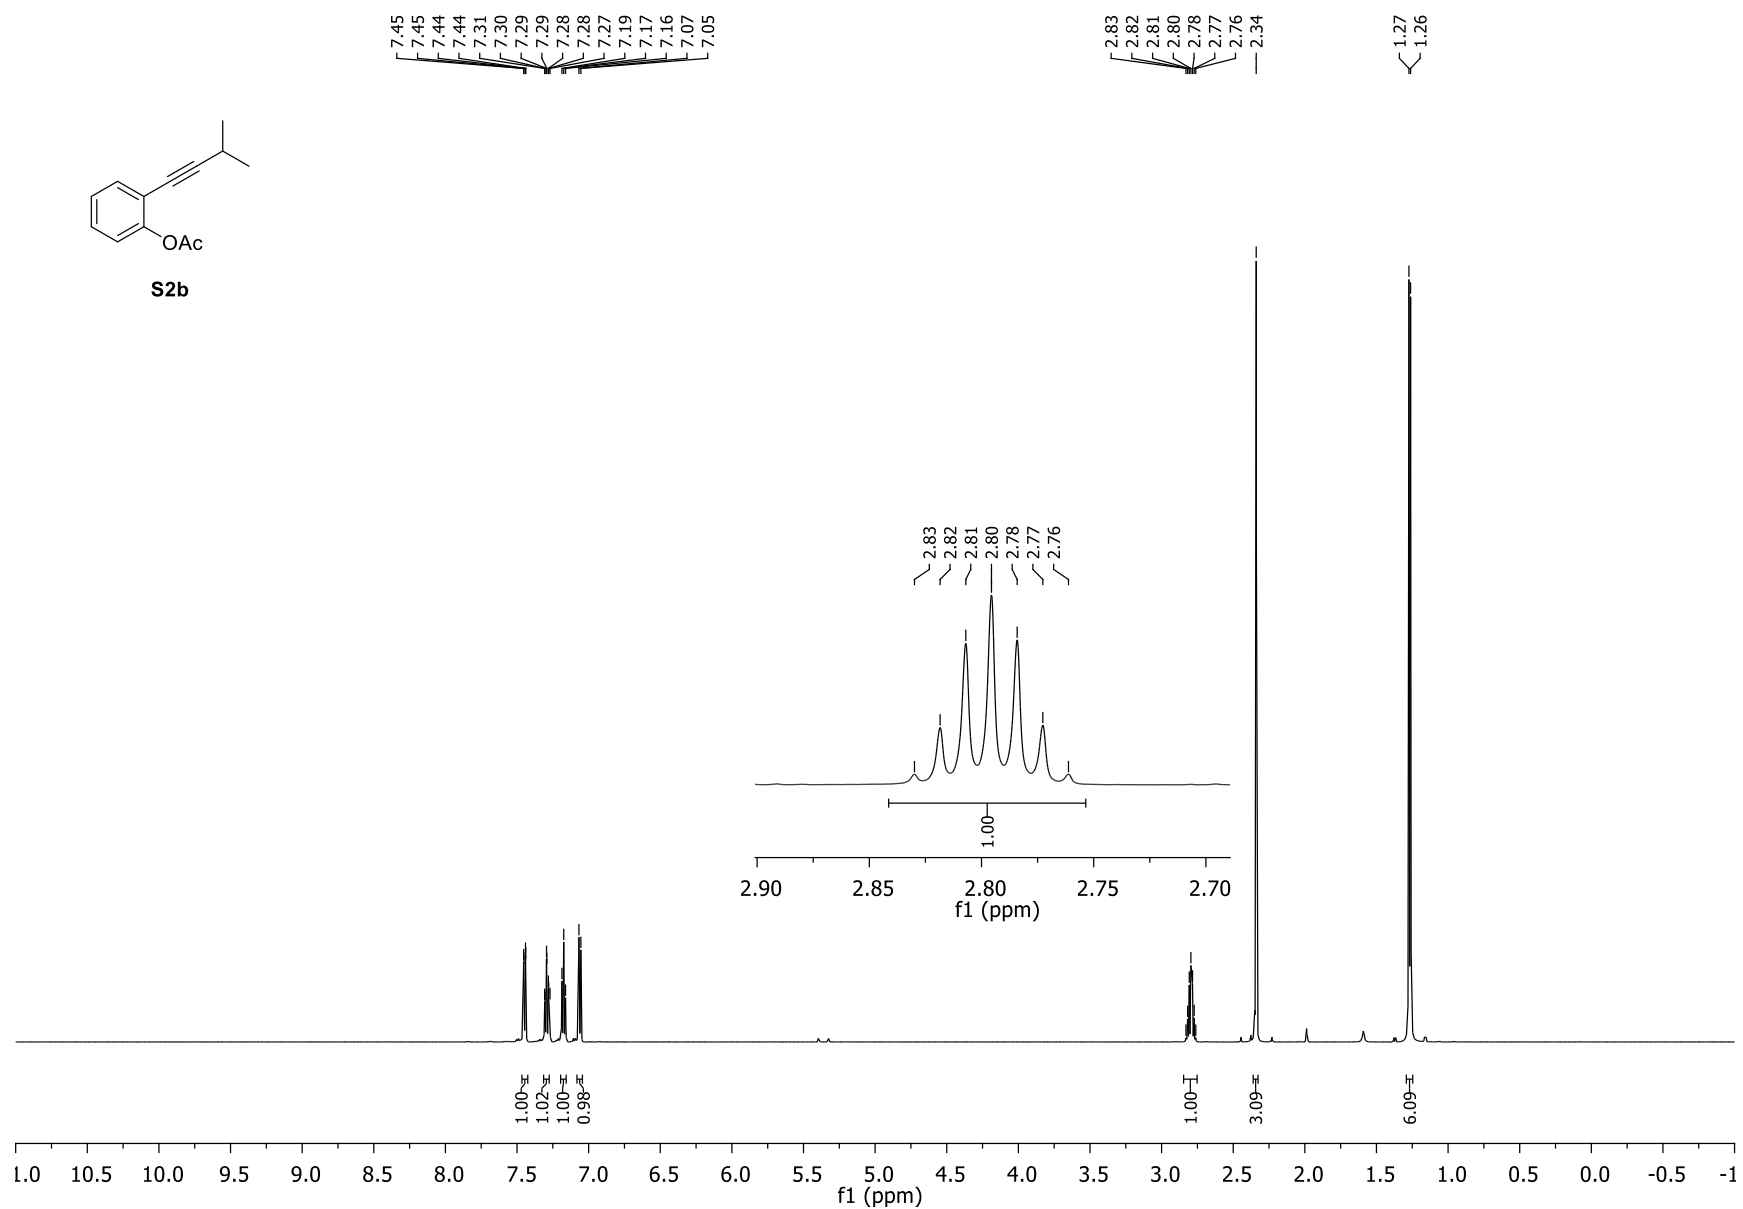

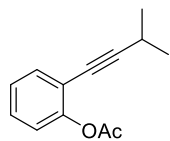

S2b

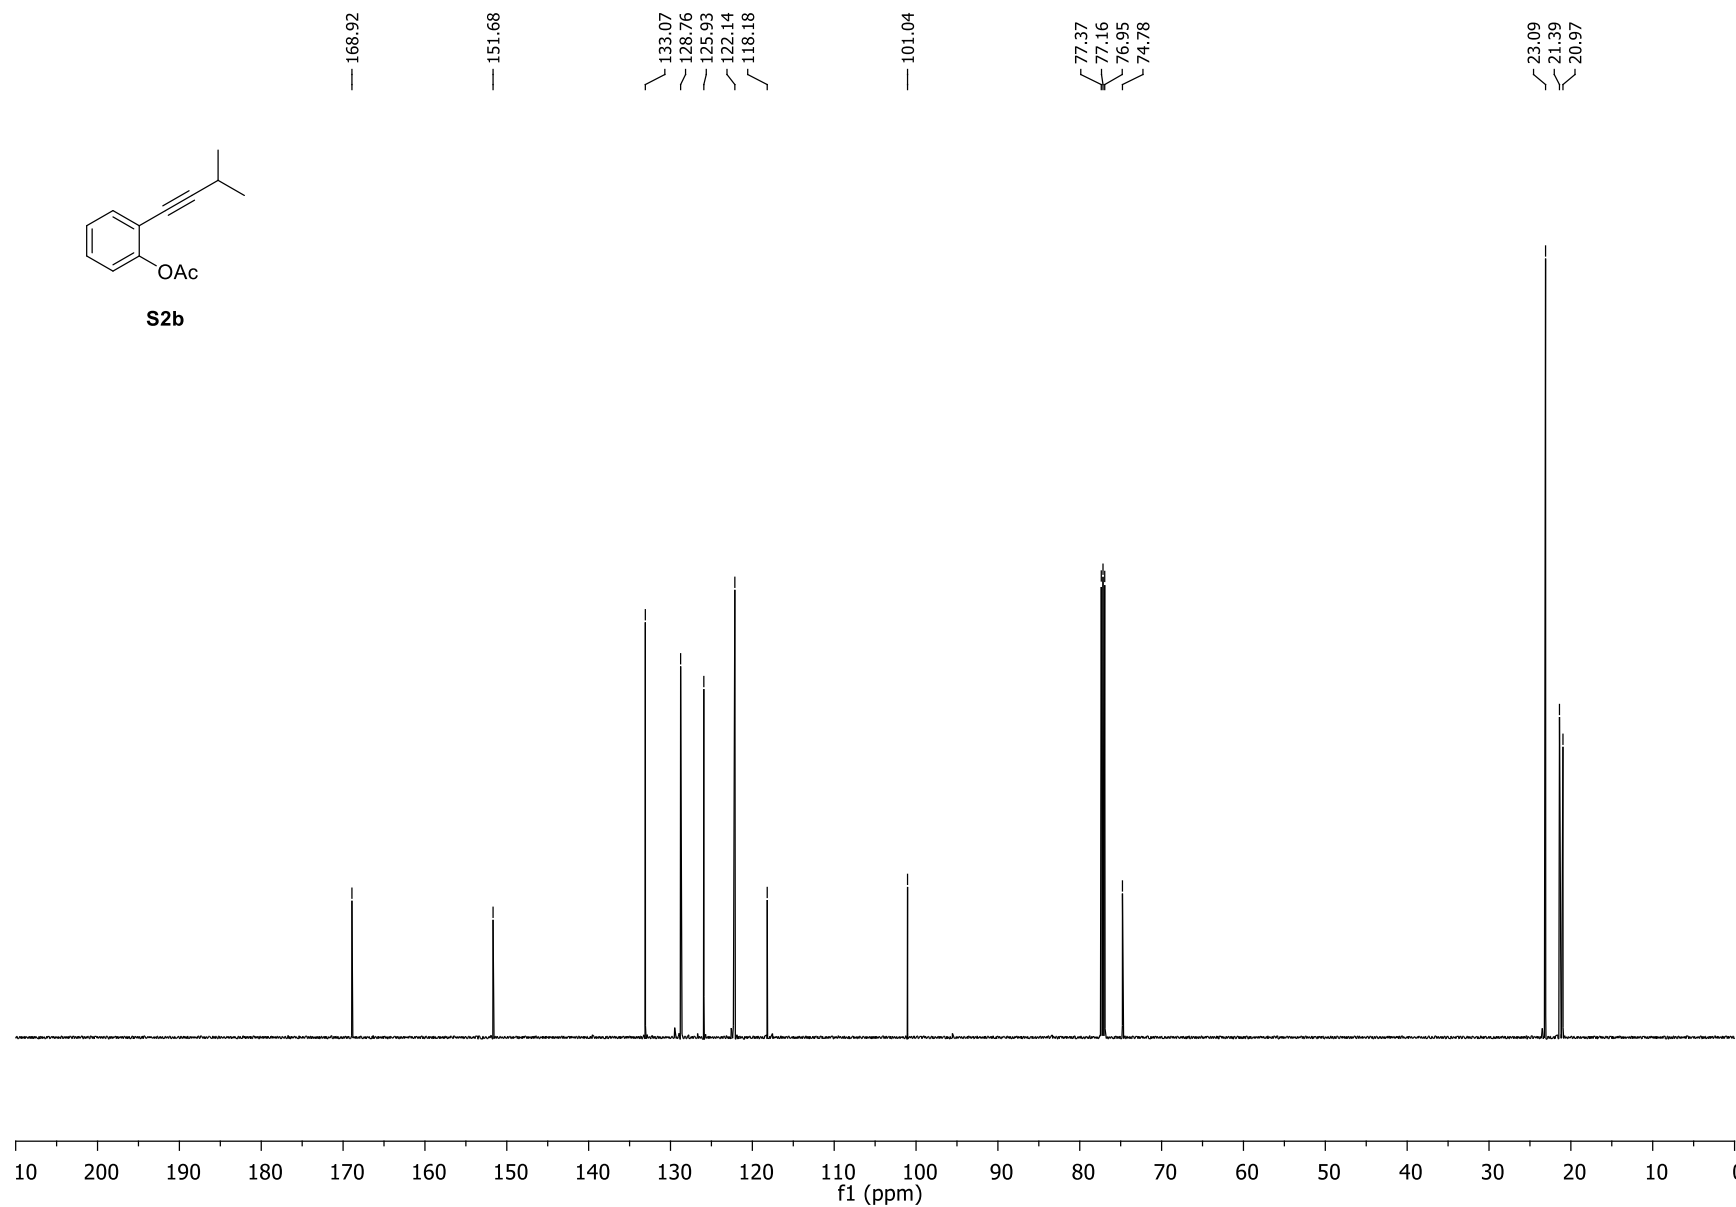

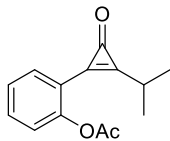

S3b

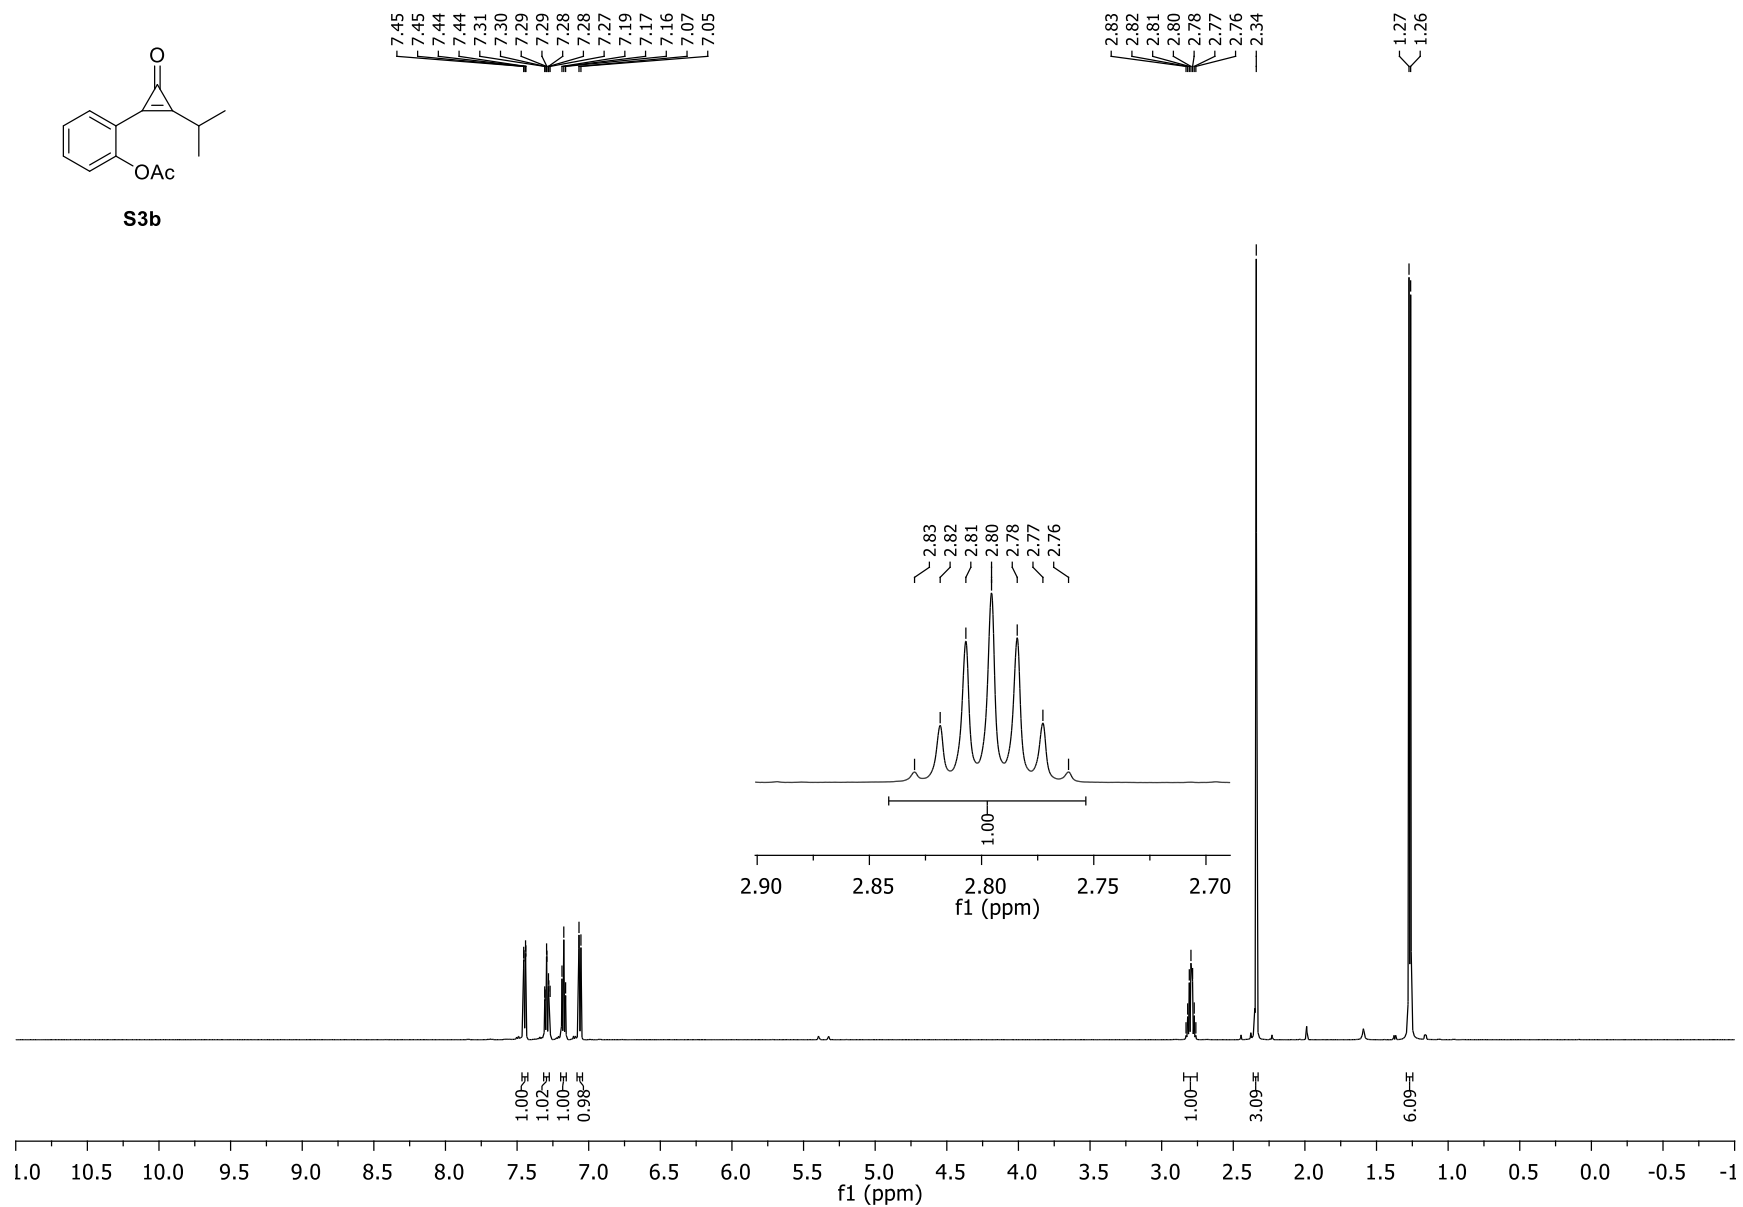

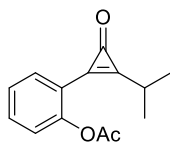

S3b

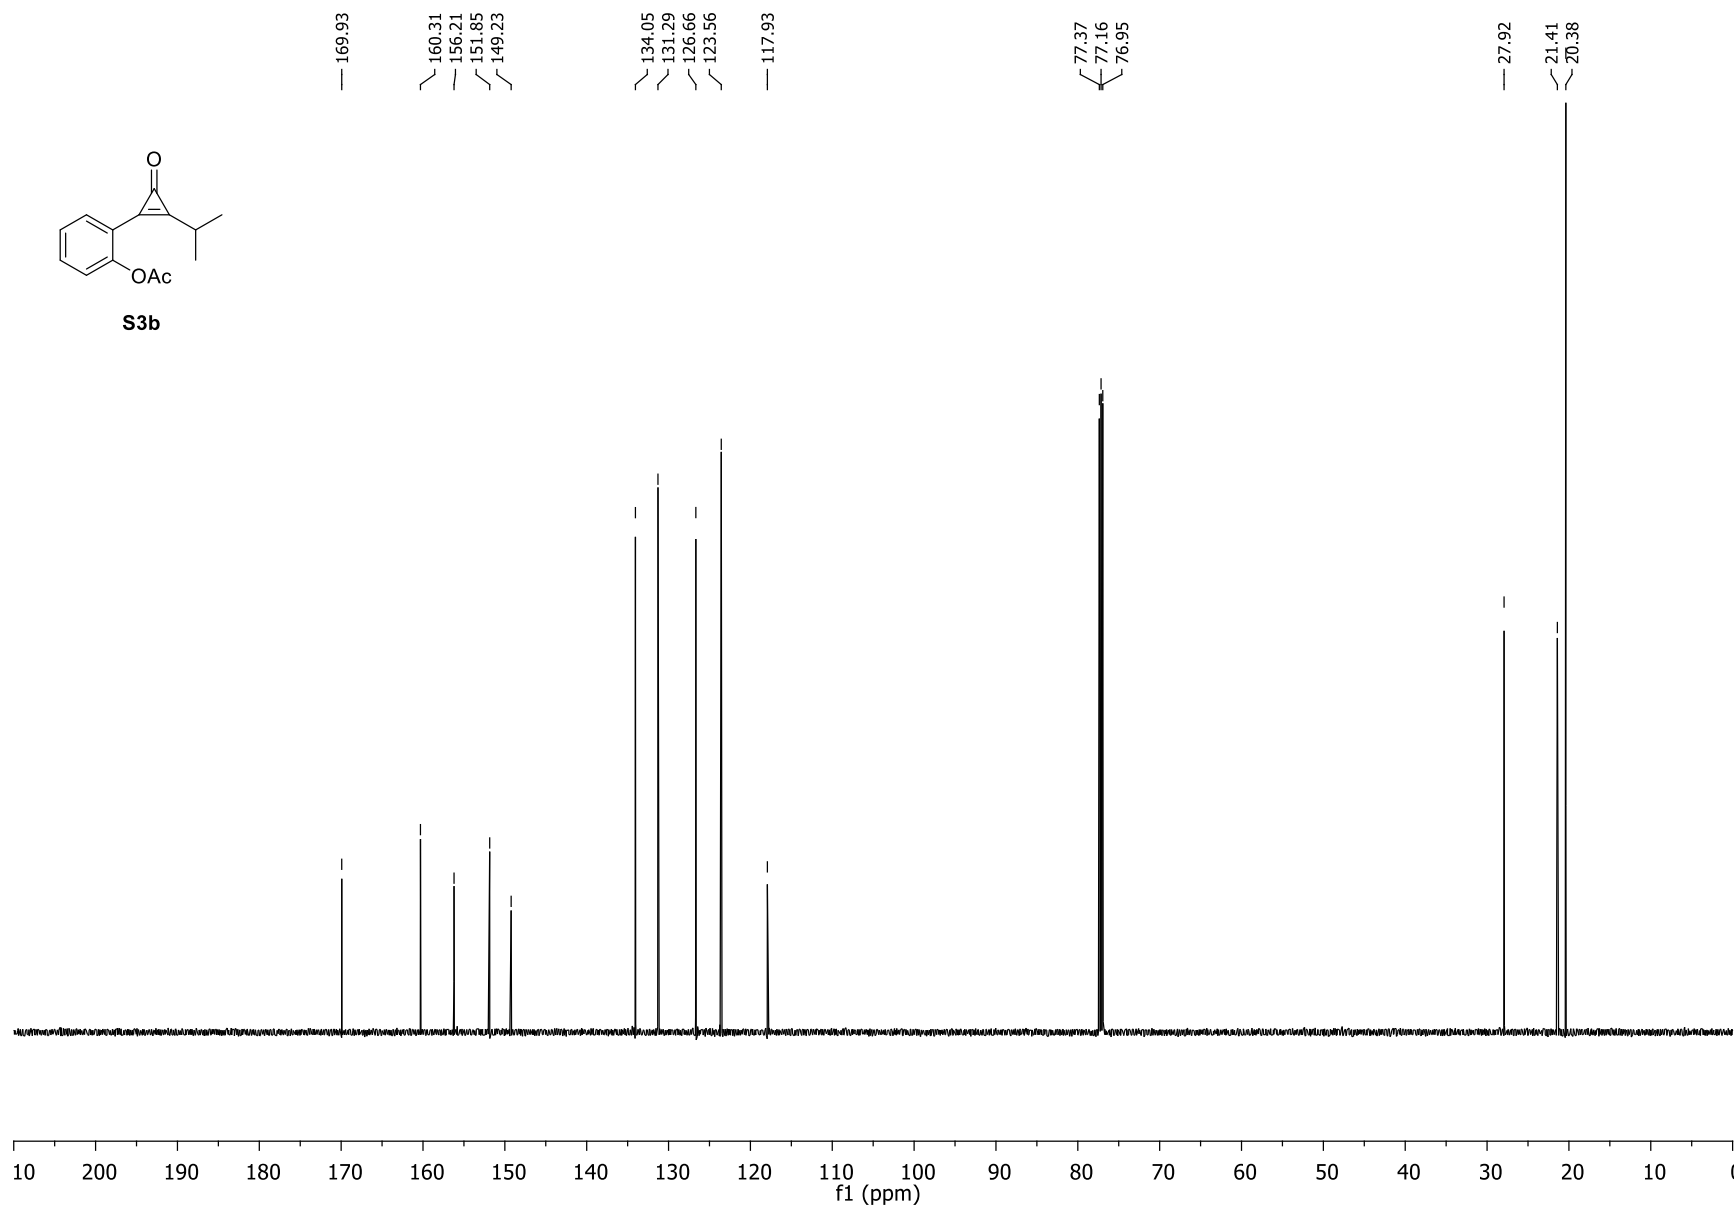

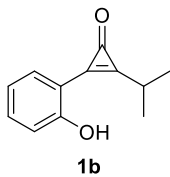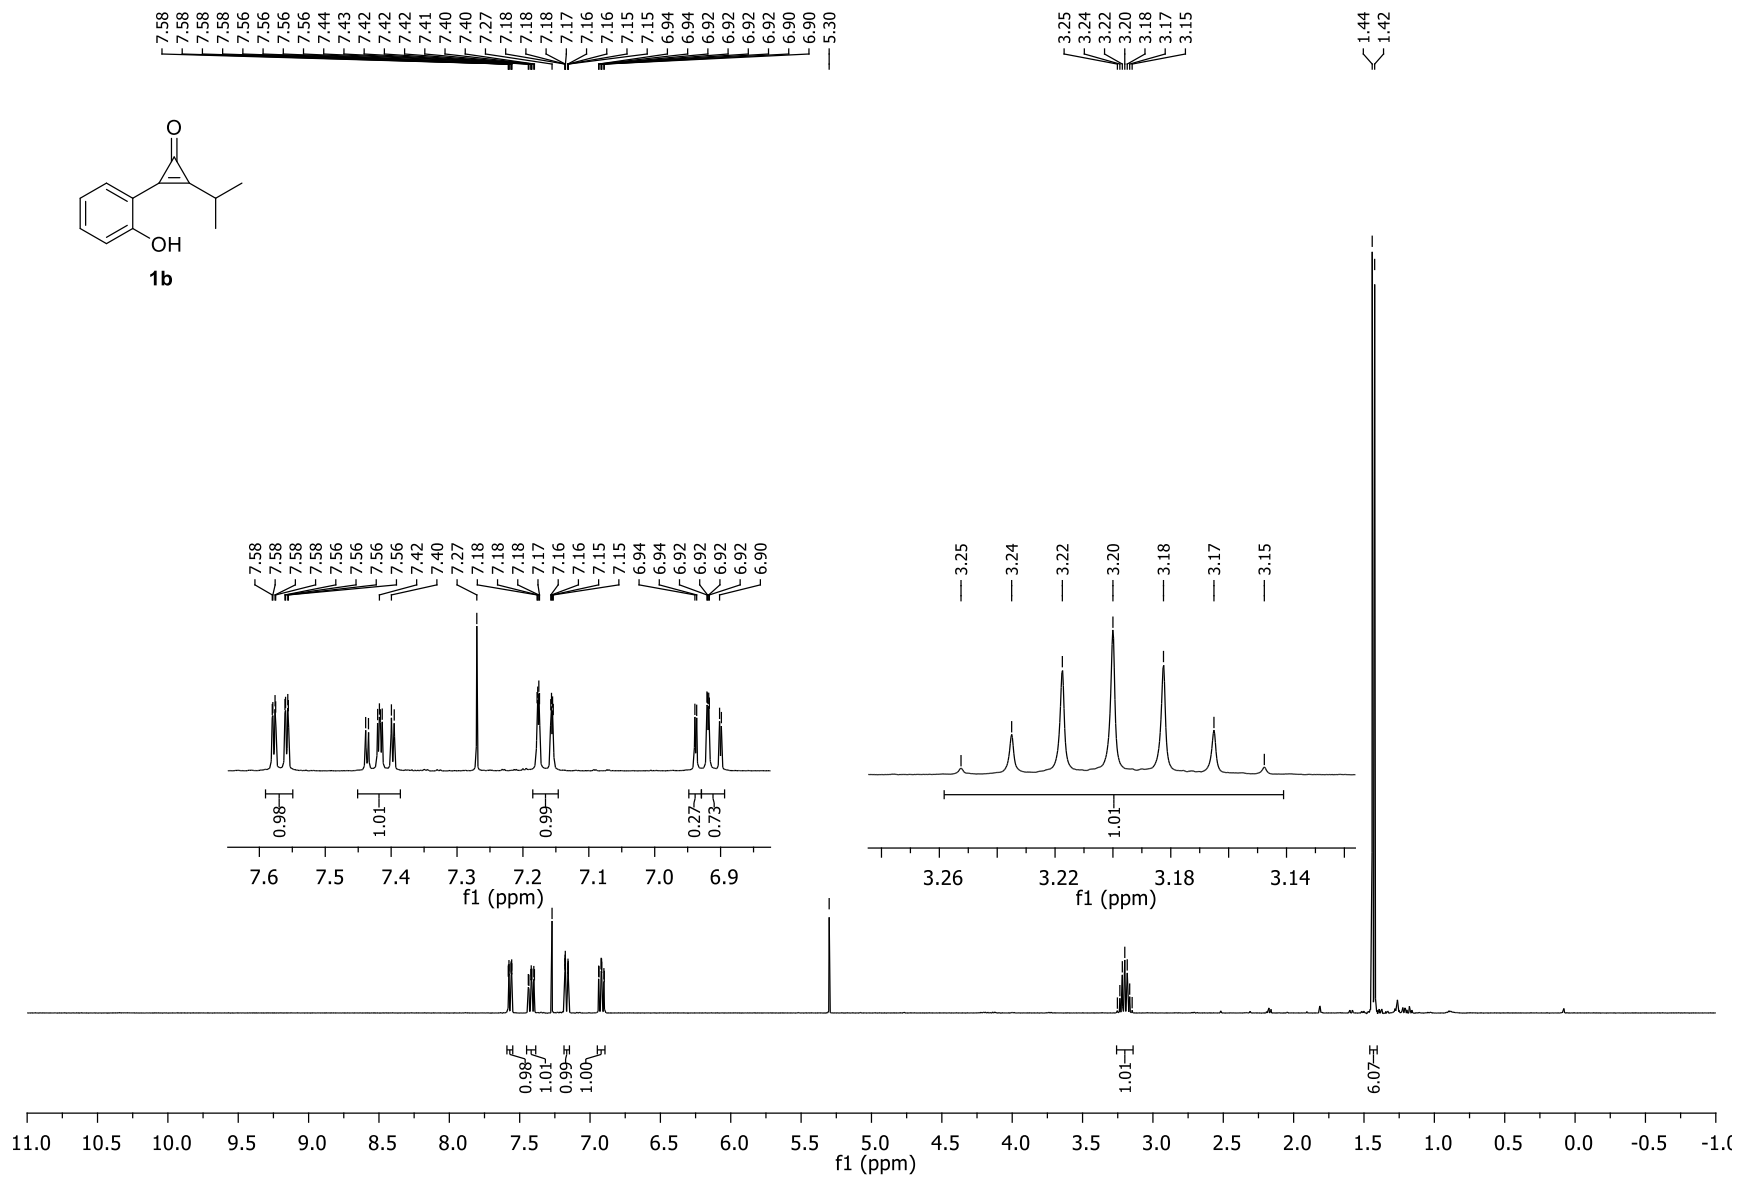

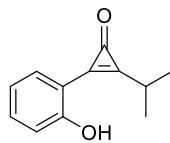

**1b**

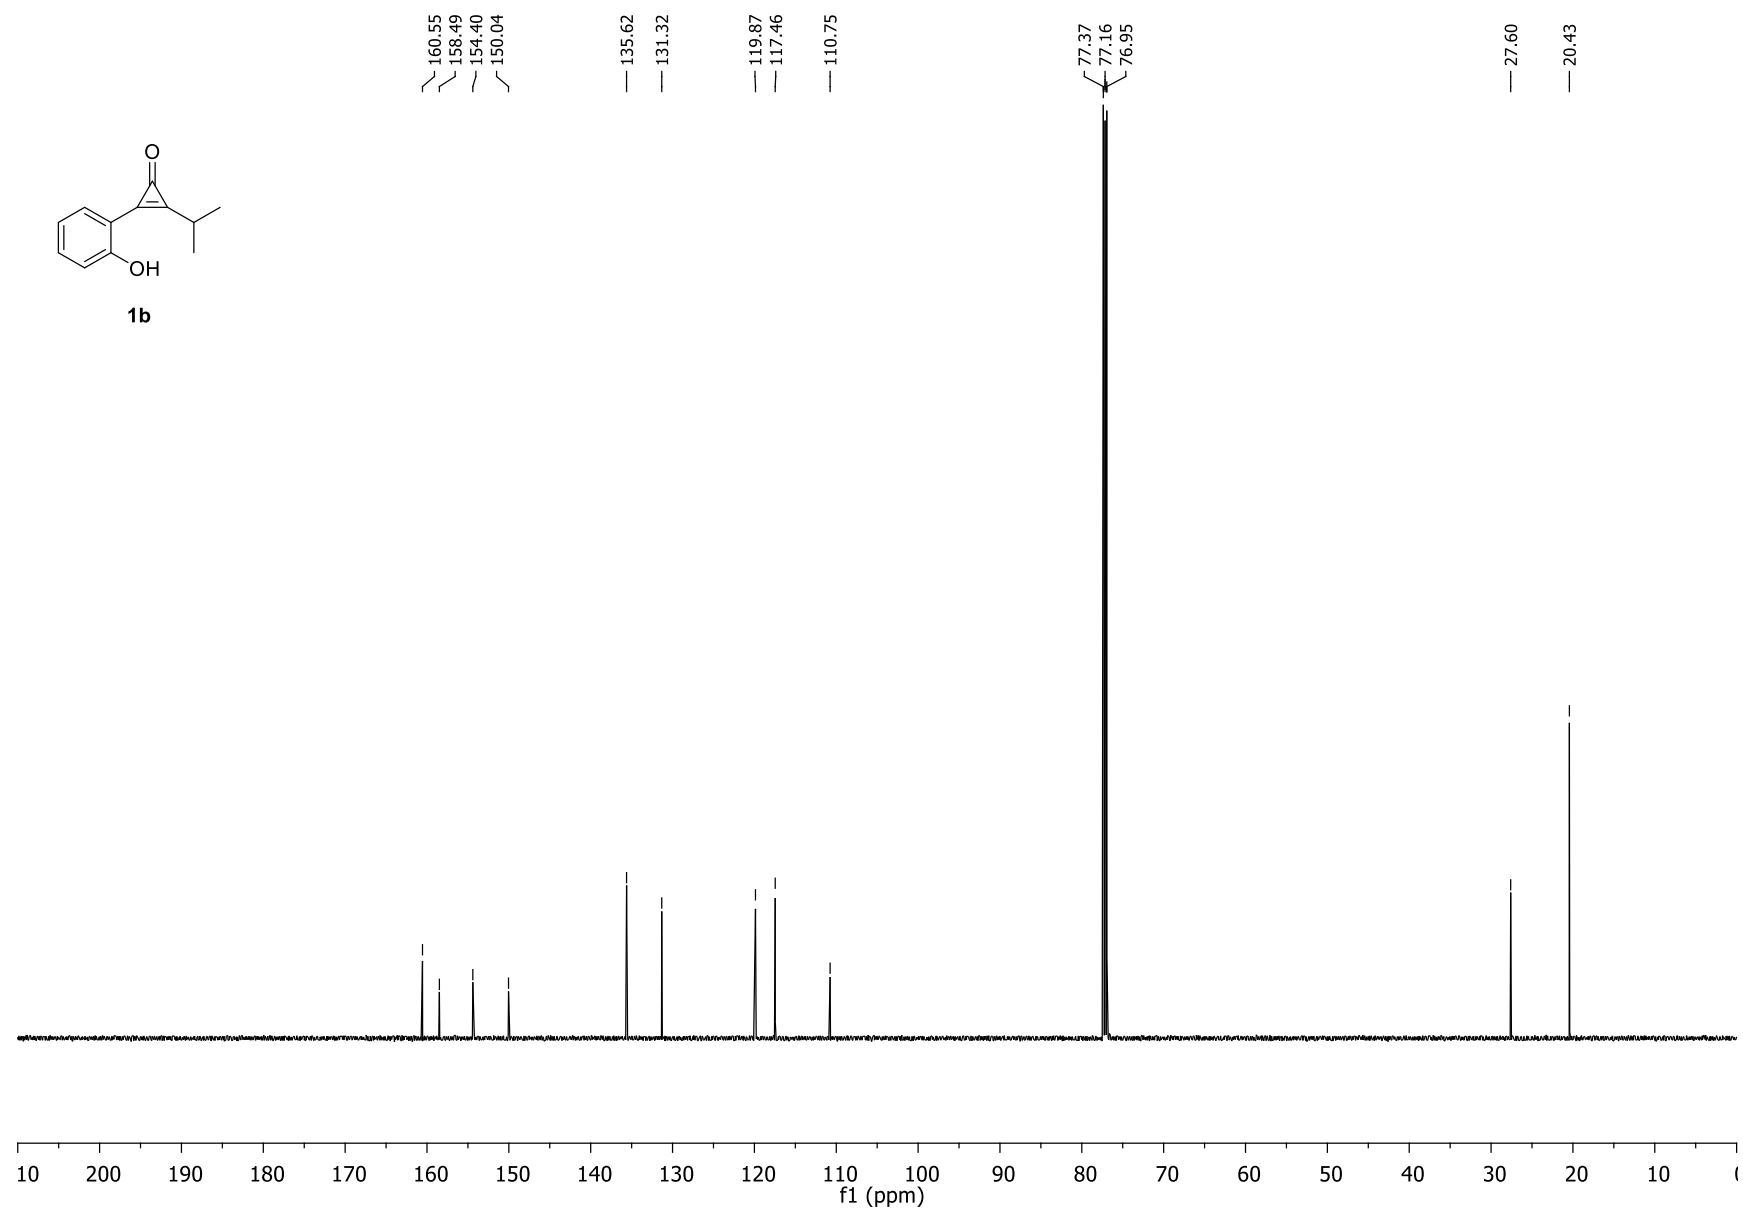

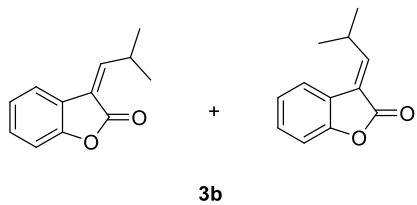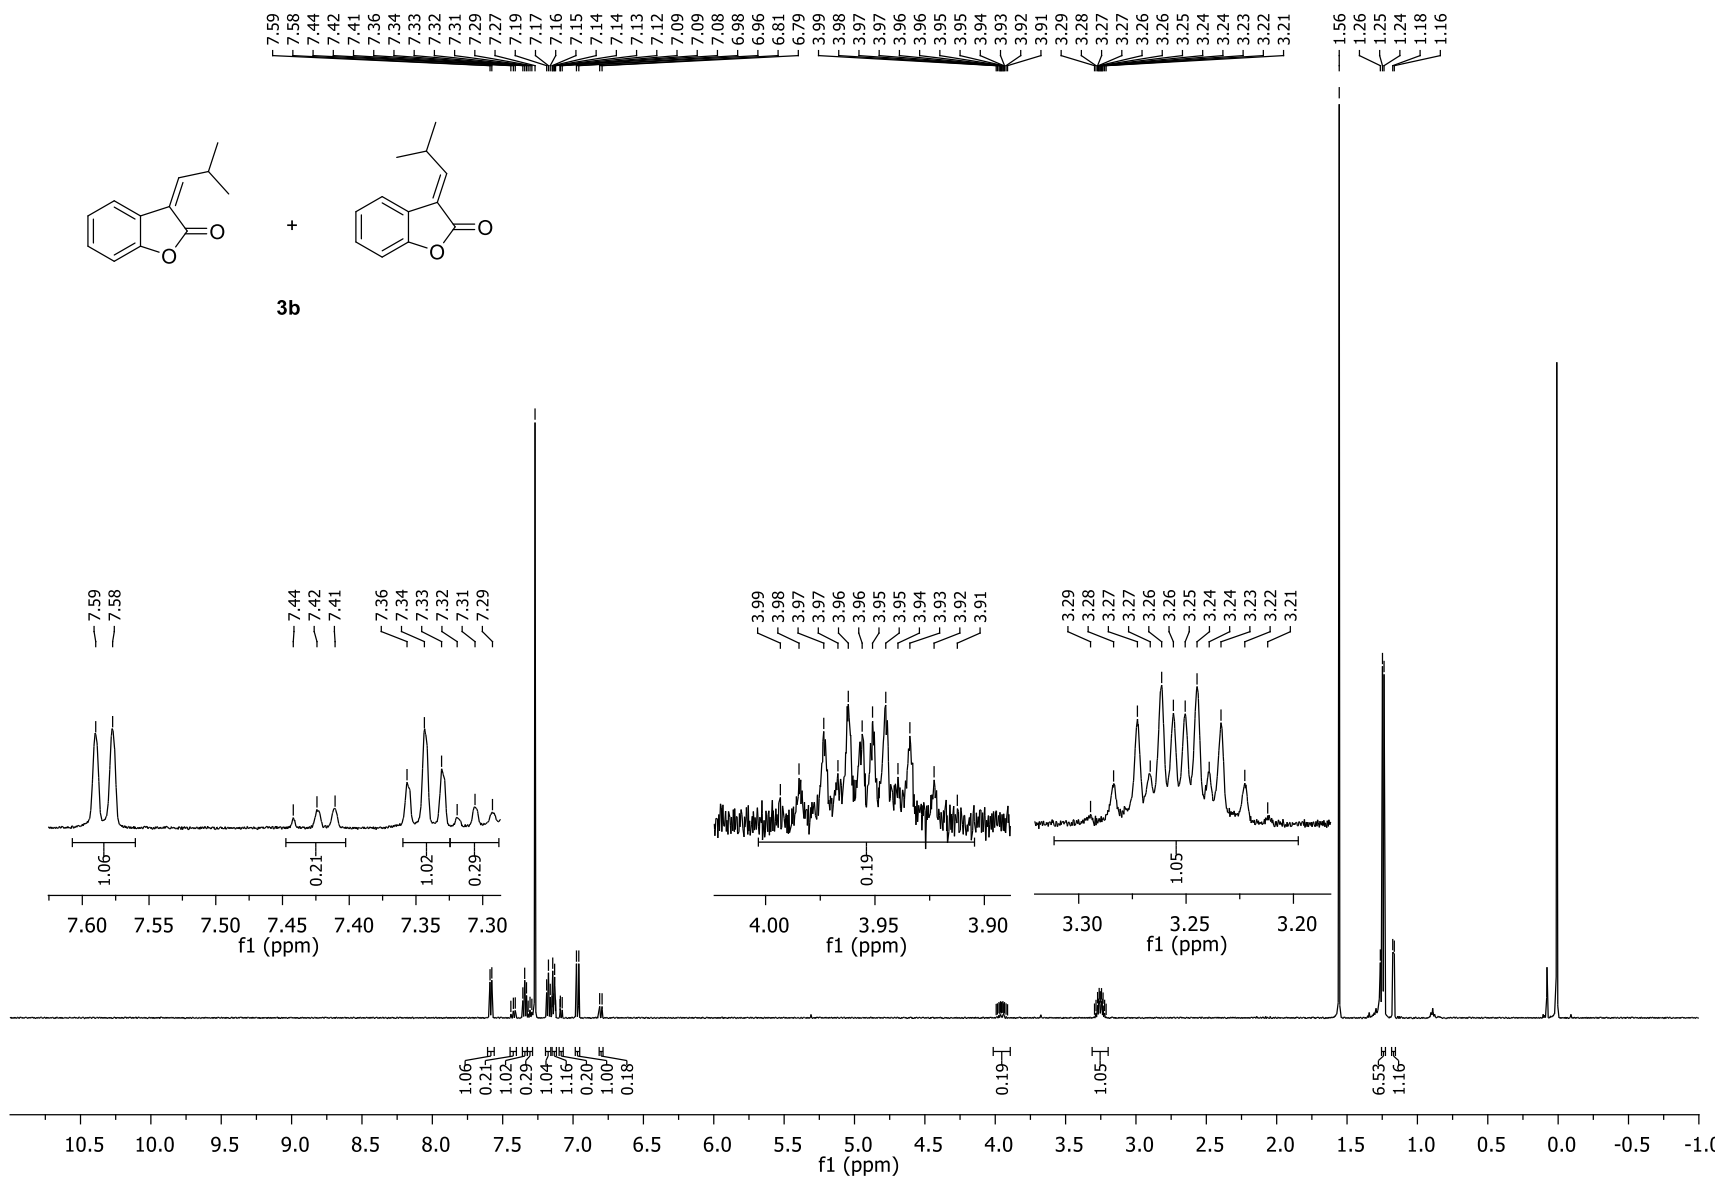



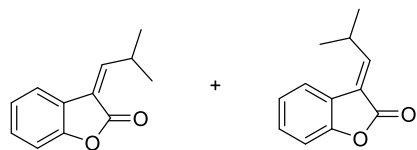

**3b**

168.58  
166.64

153.95  
152.93  
152.85  
152.81

130.01  
129.70  
124.10  
123.58  
122.62  
121.55  
119.67  
110.98

77.37  
77.16  
76.95

29.85  
29.11  
27.21  
22.25  
21.68

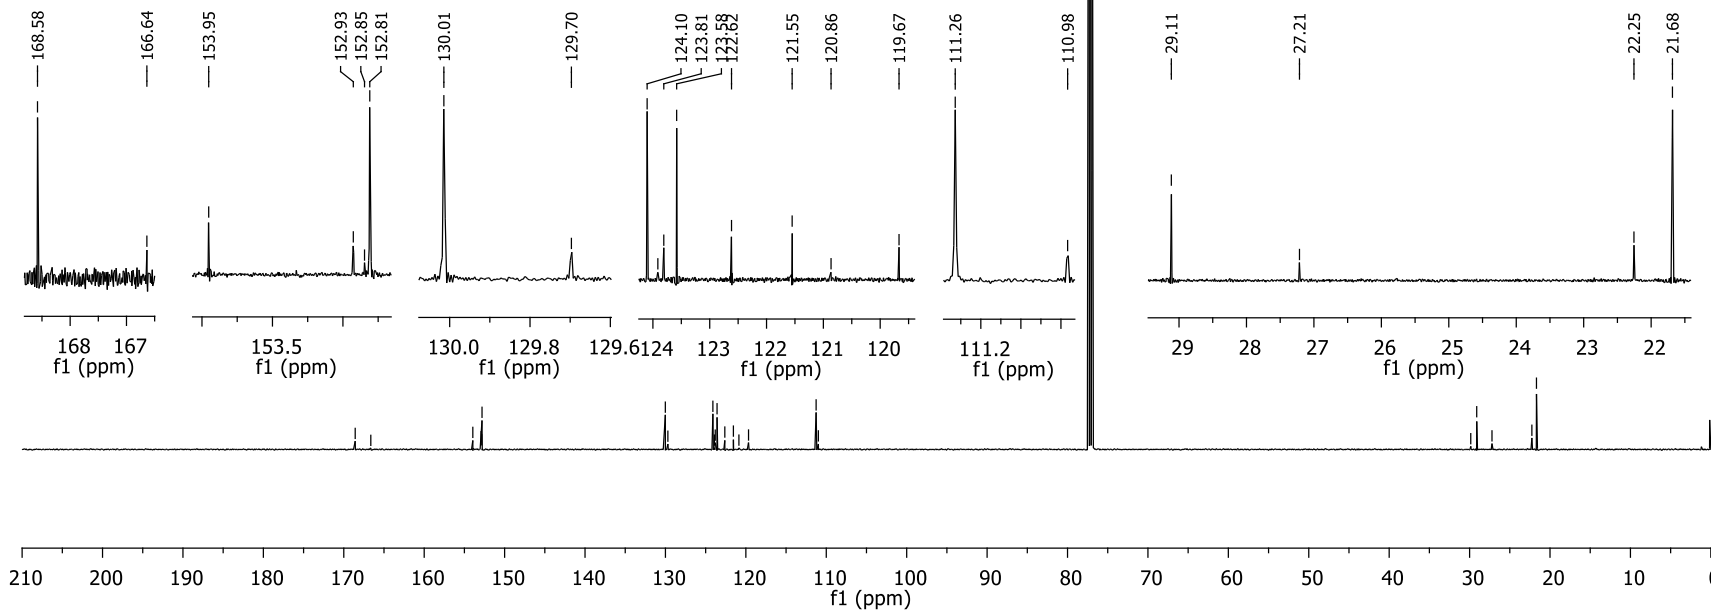

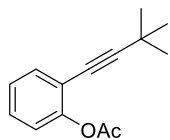

S2c

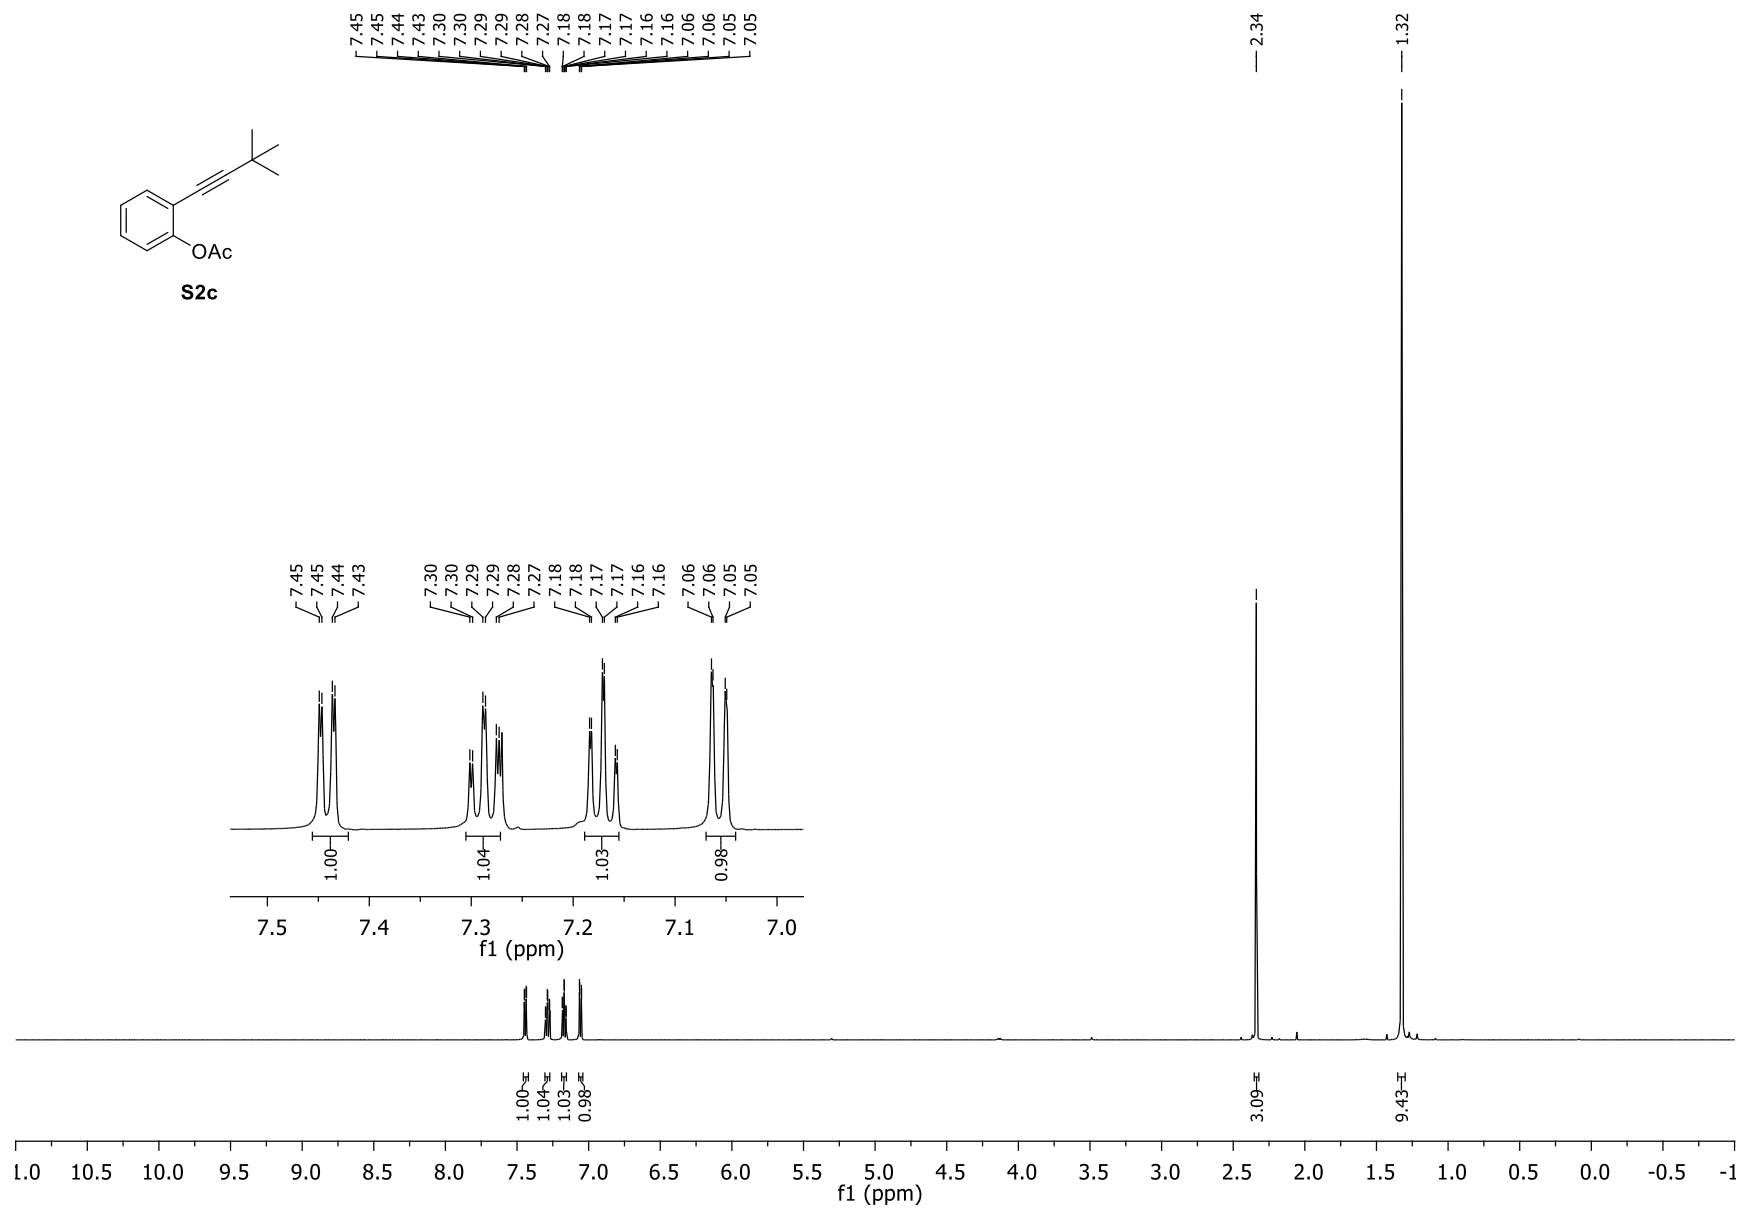

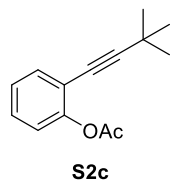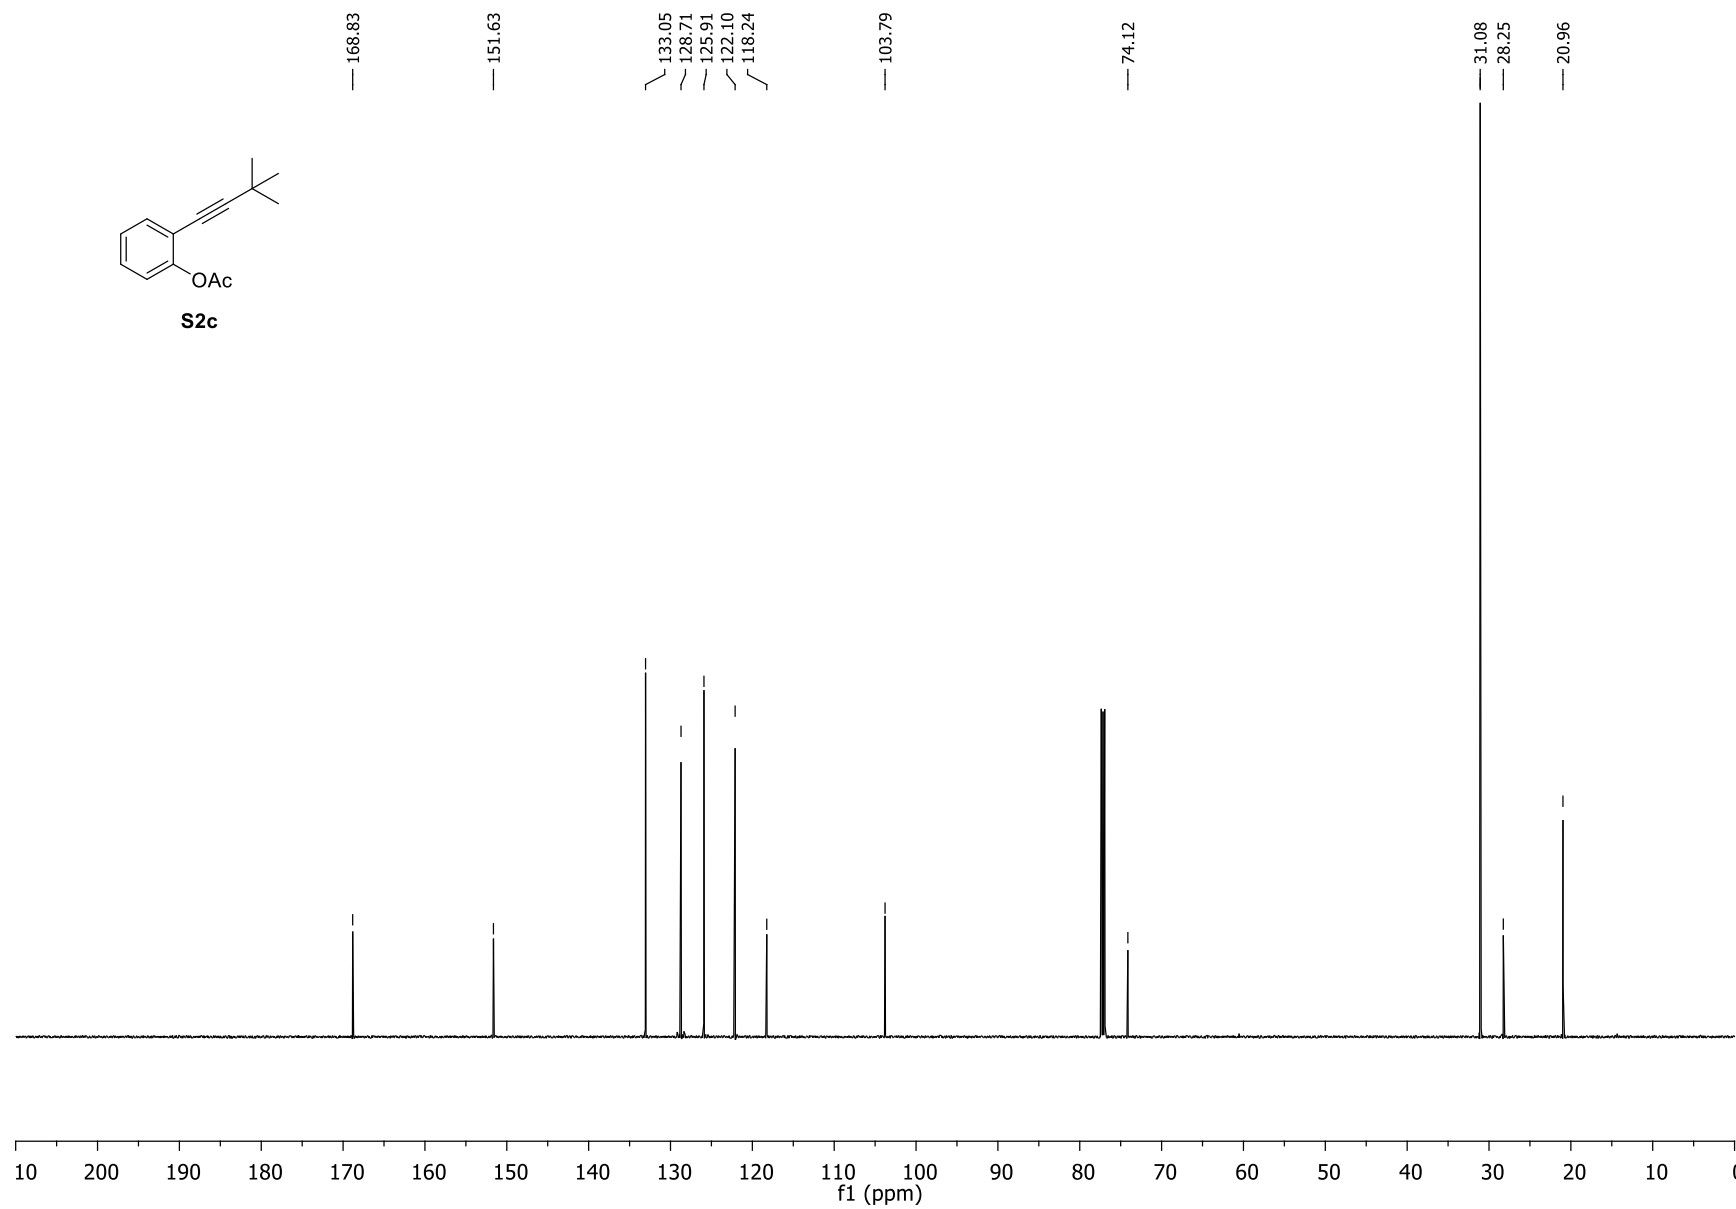

S51

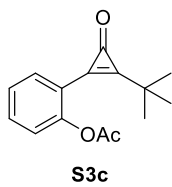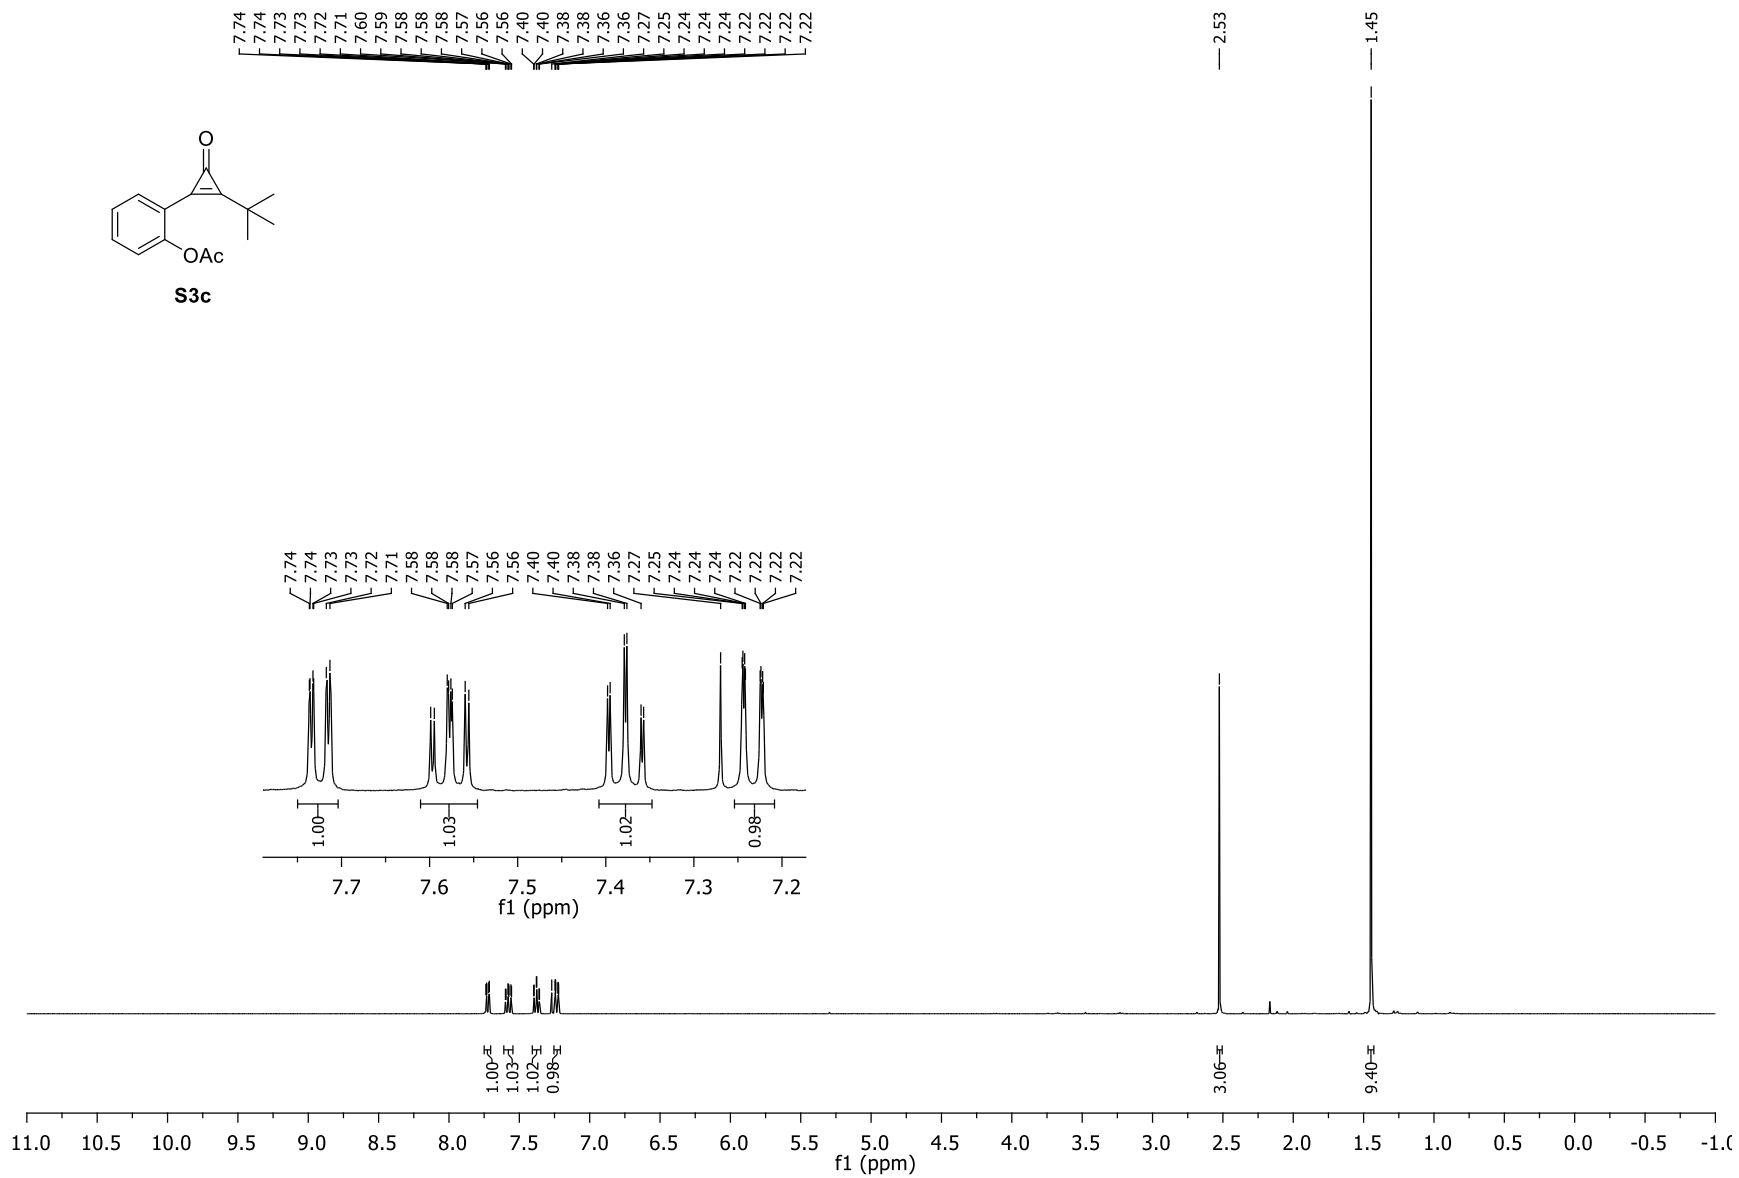

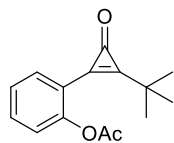

S3c

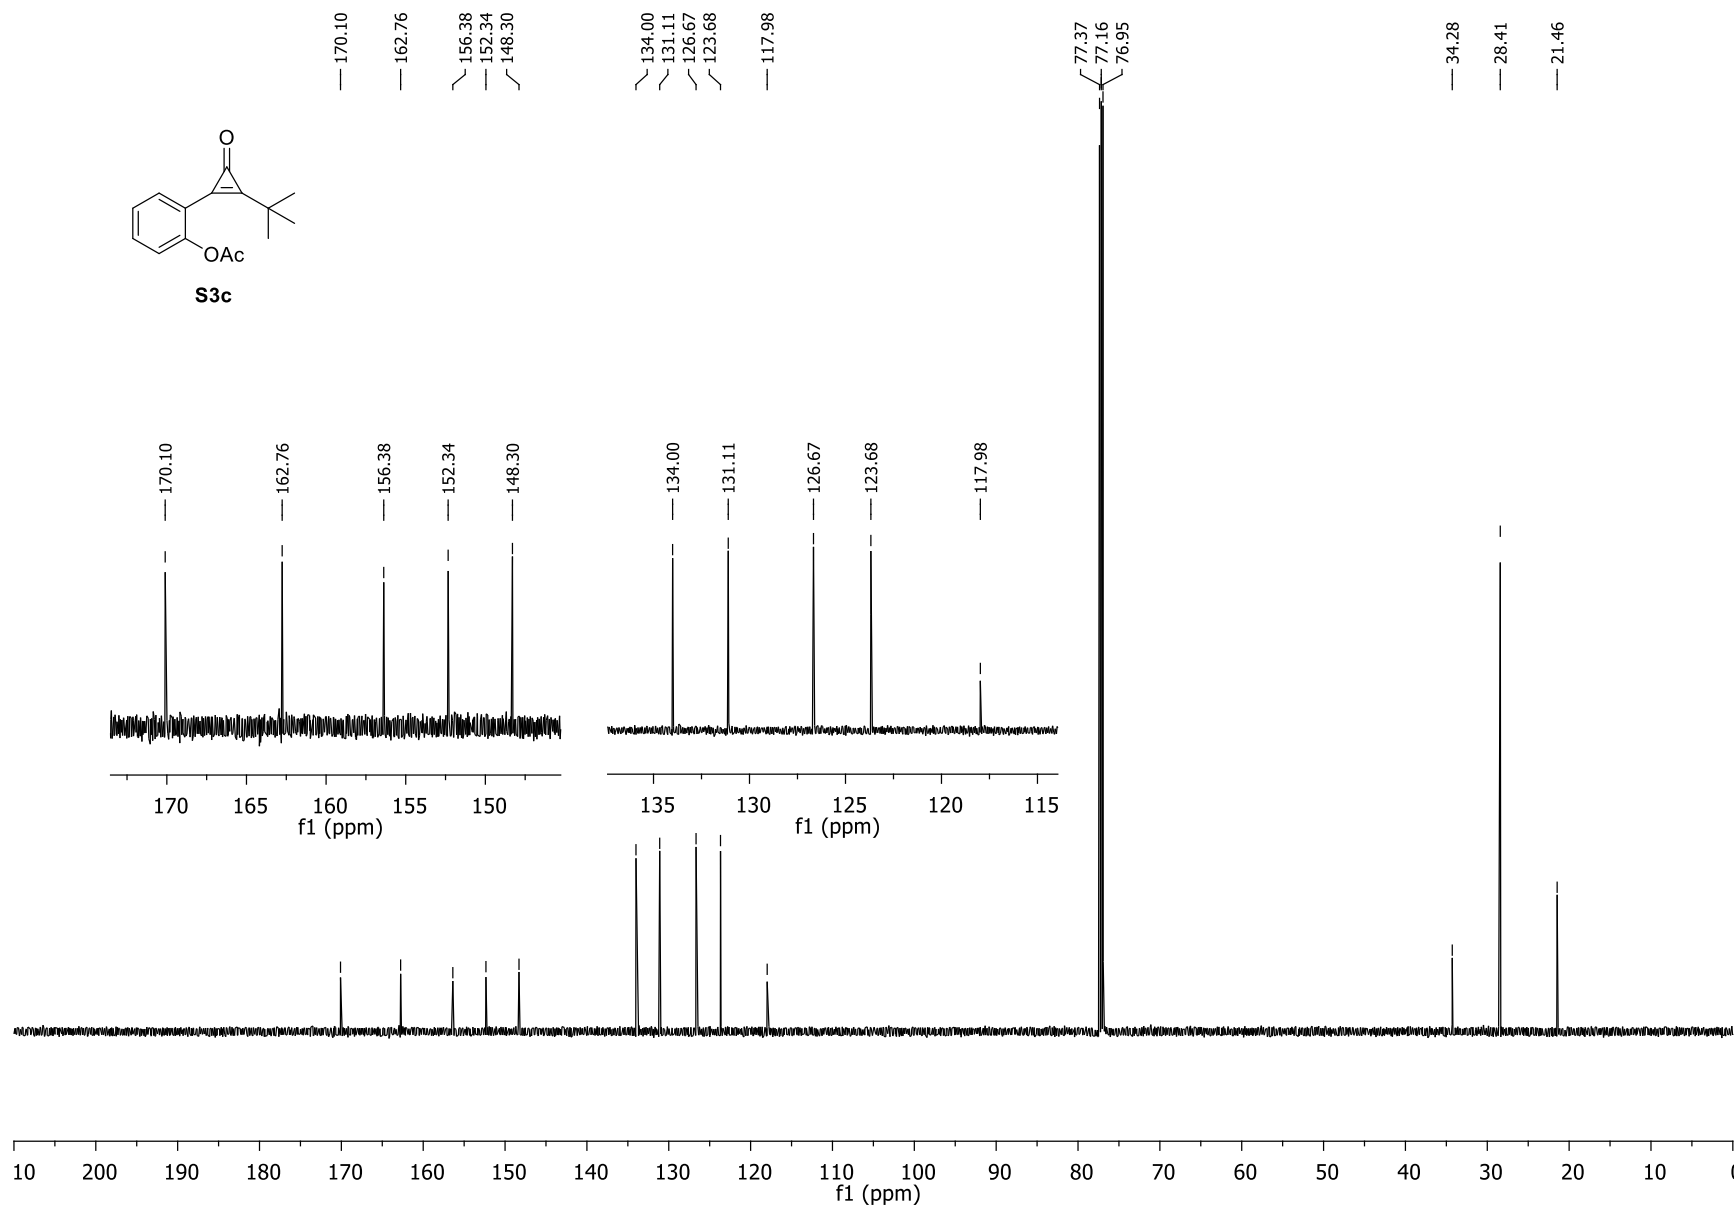

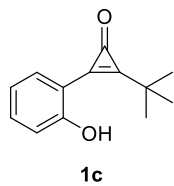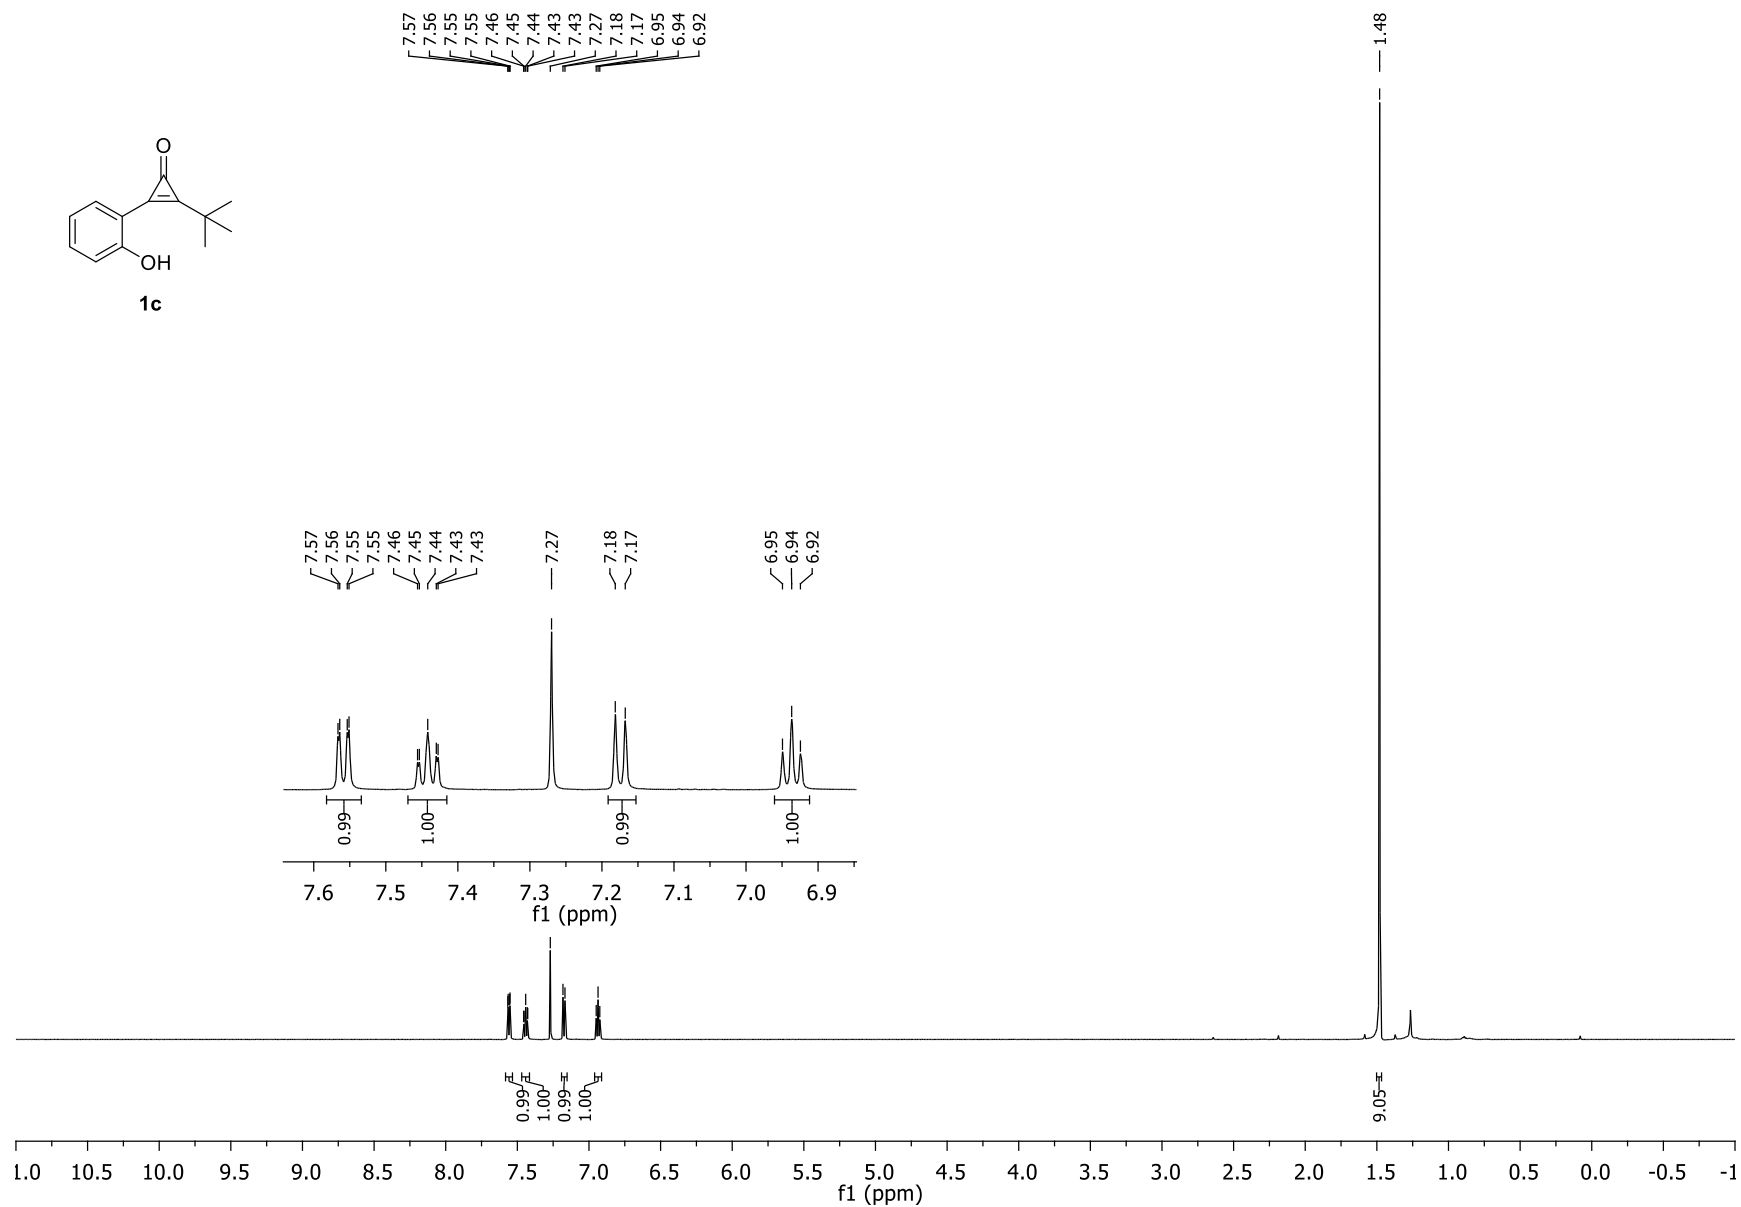

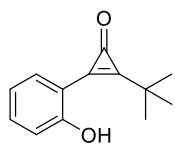

**1c**

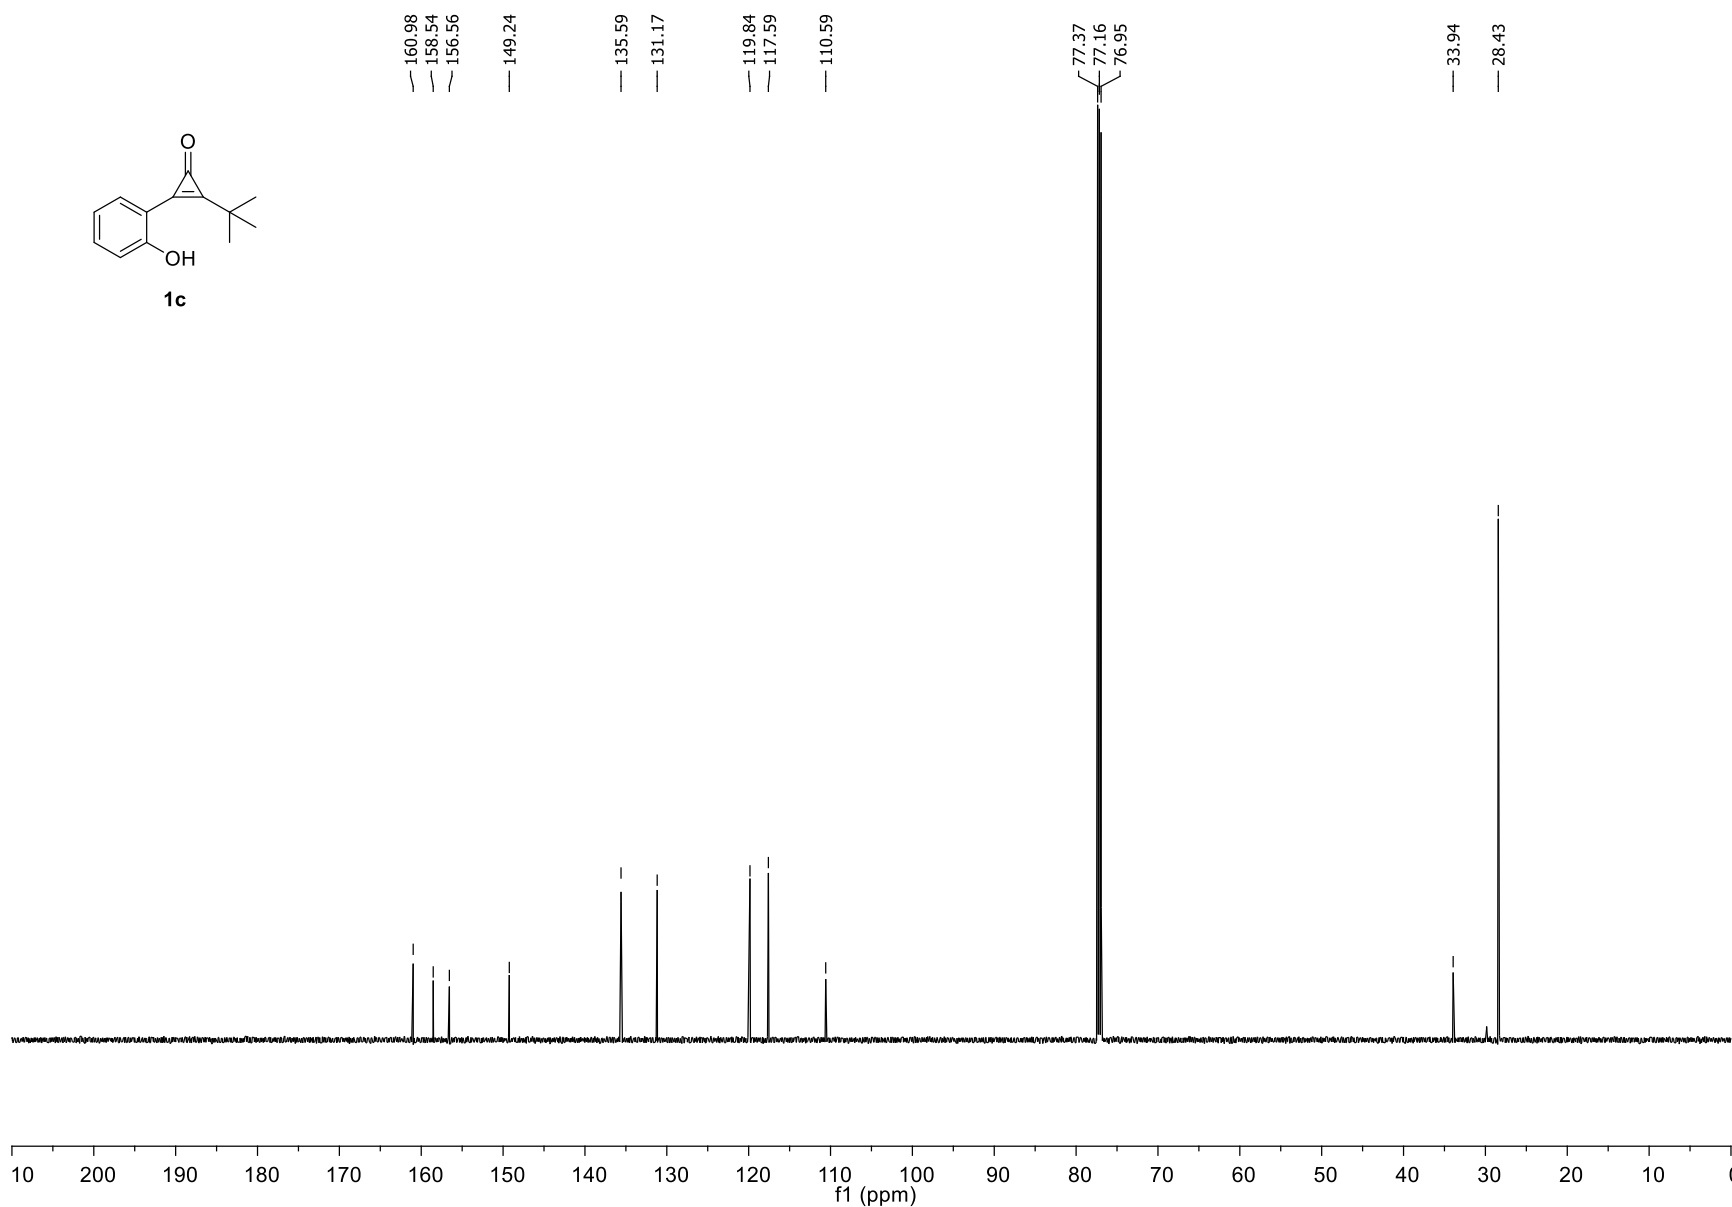

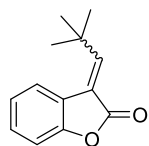

3c

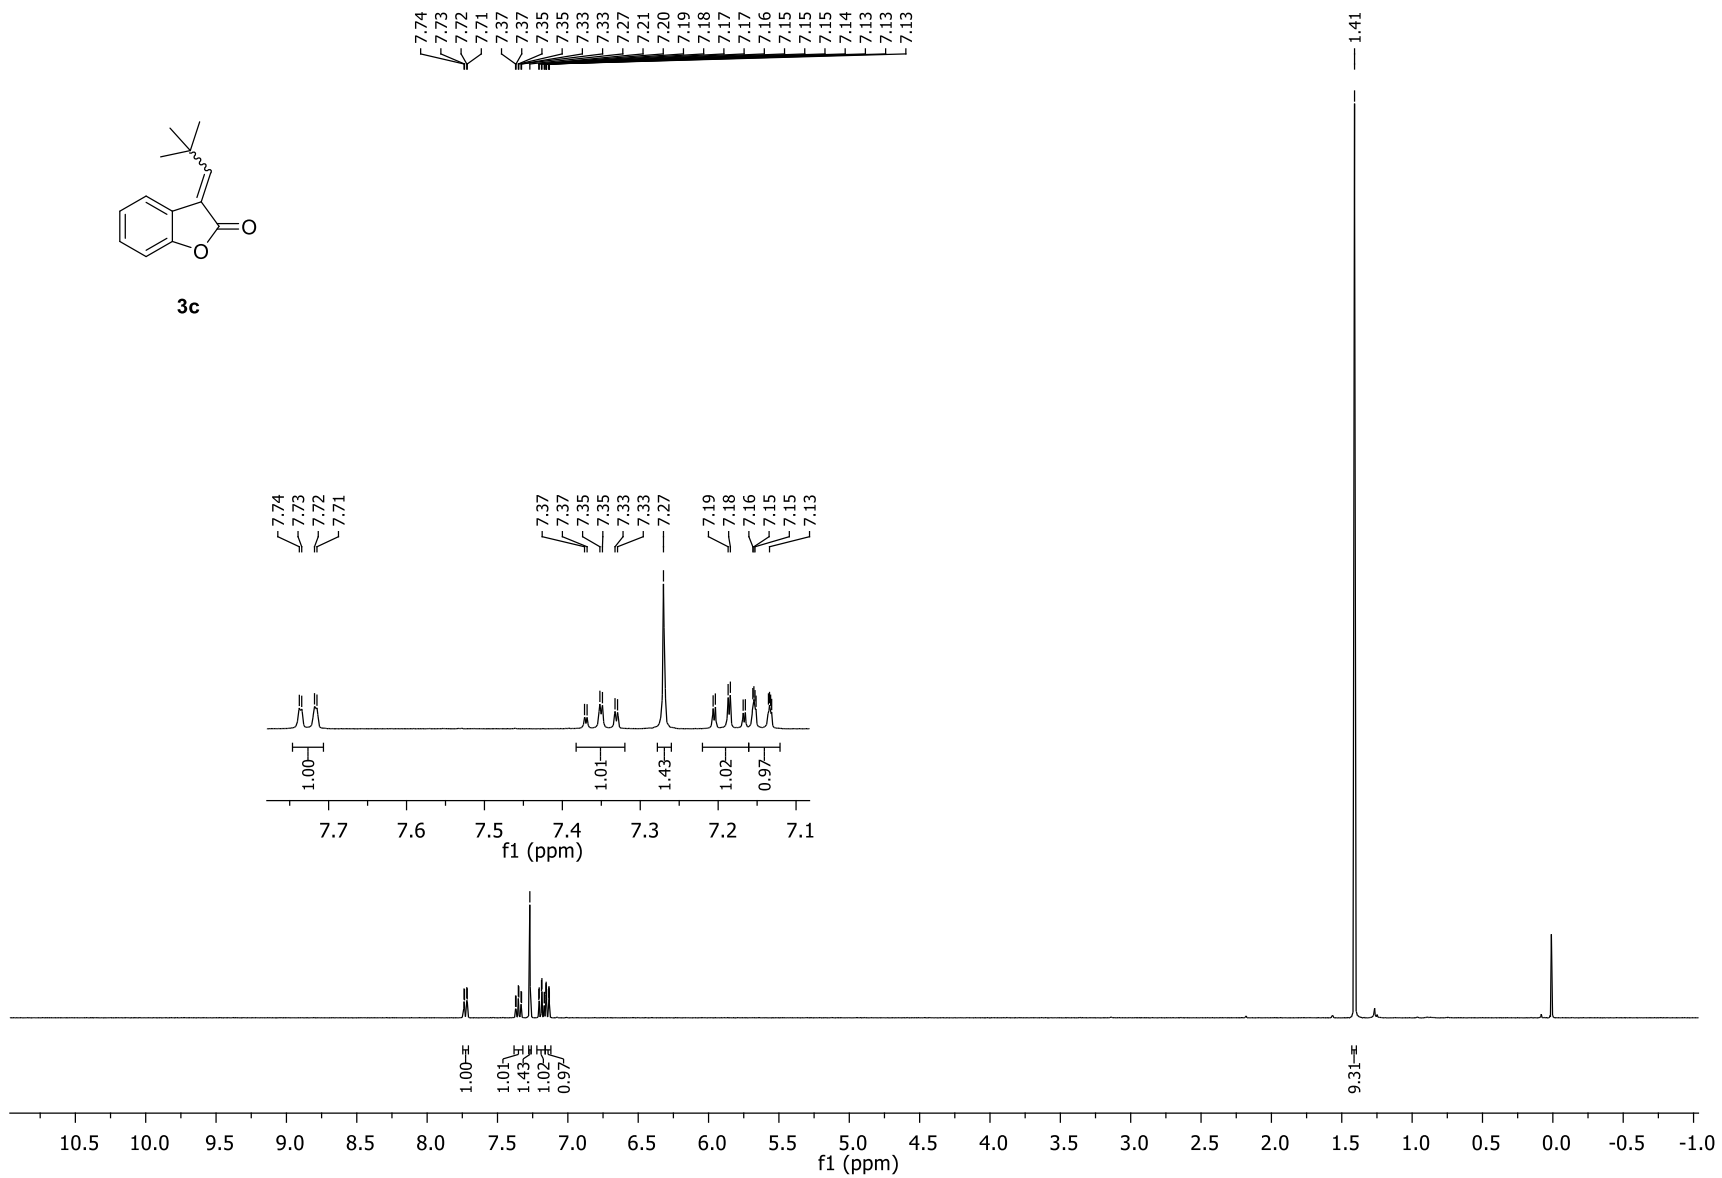



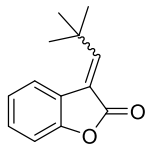

3c

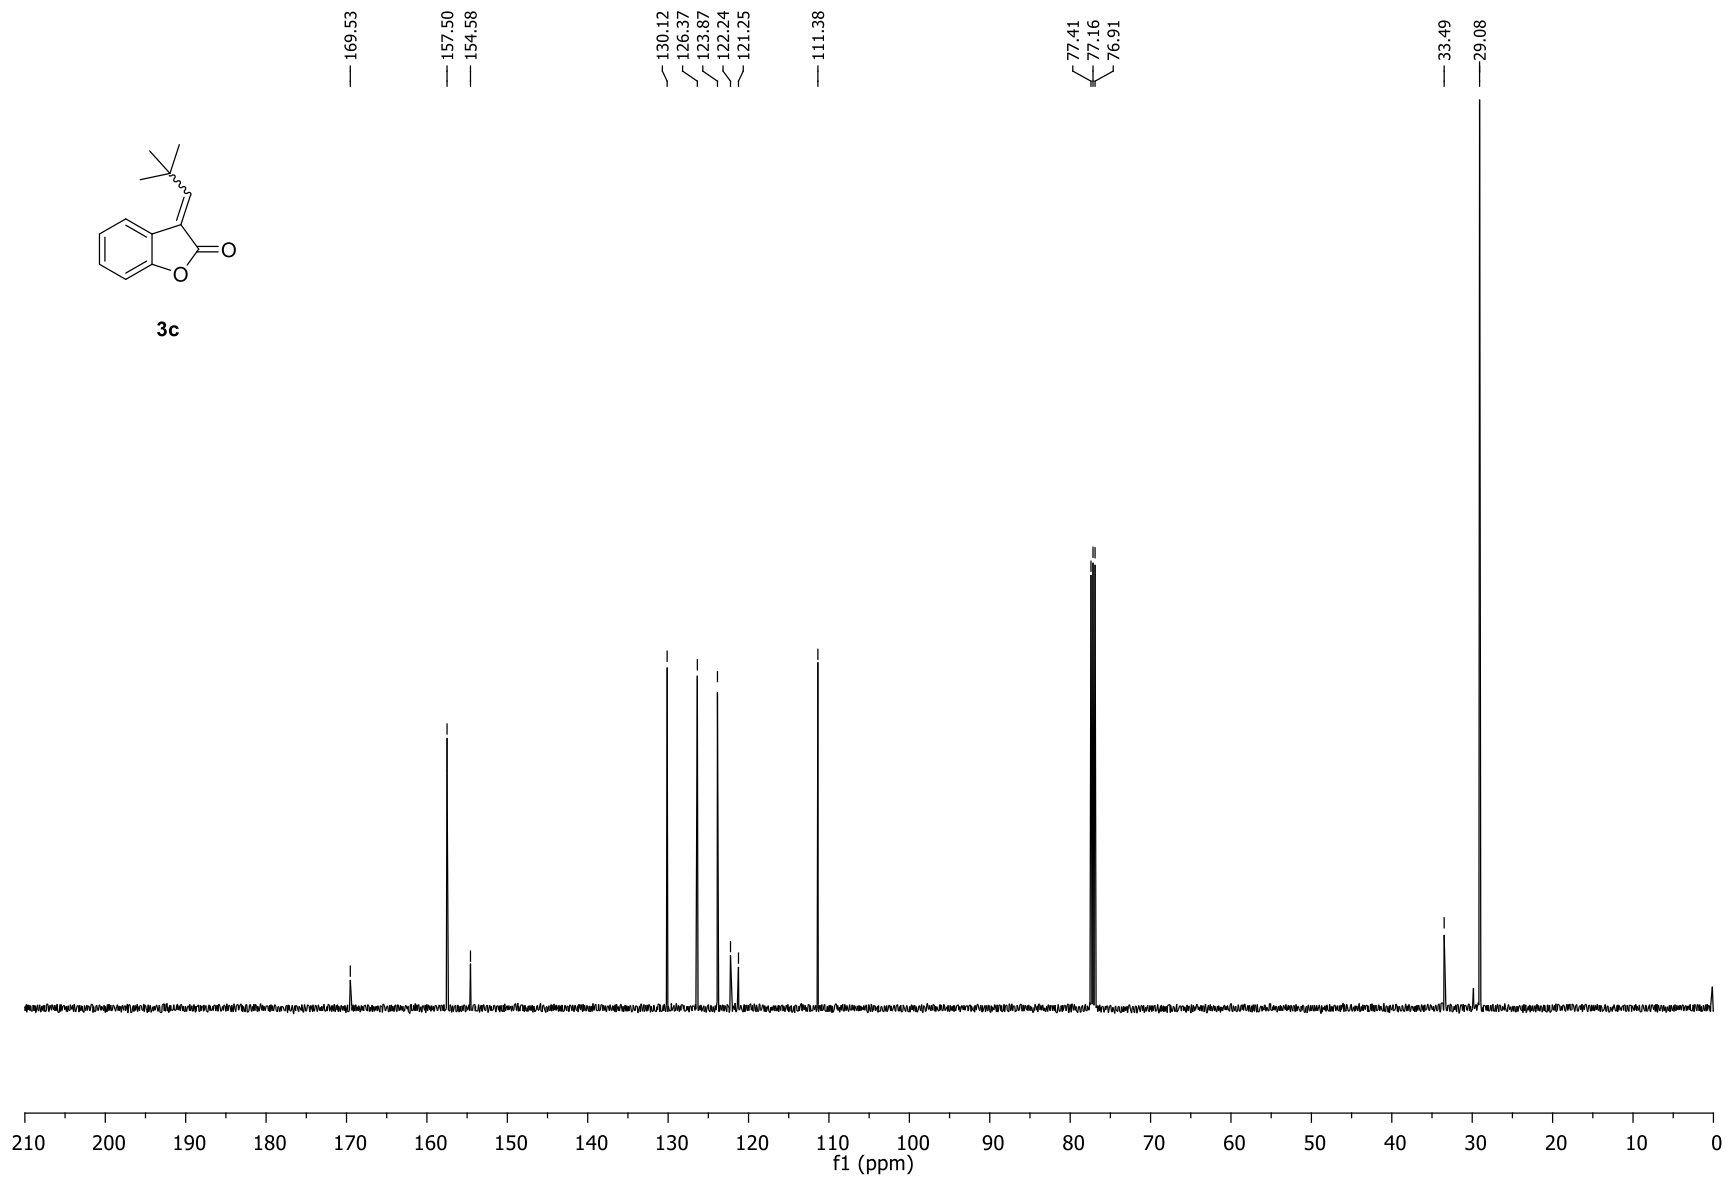

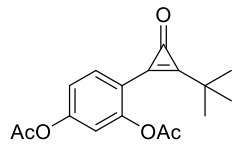

**S6**

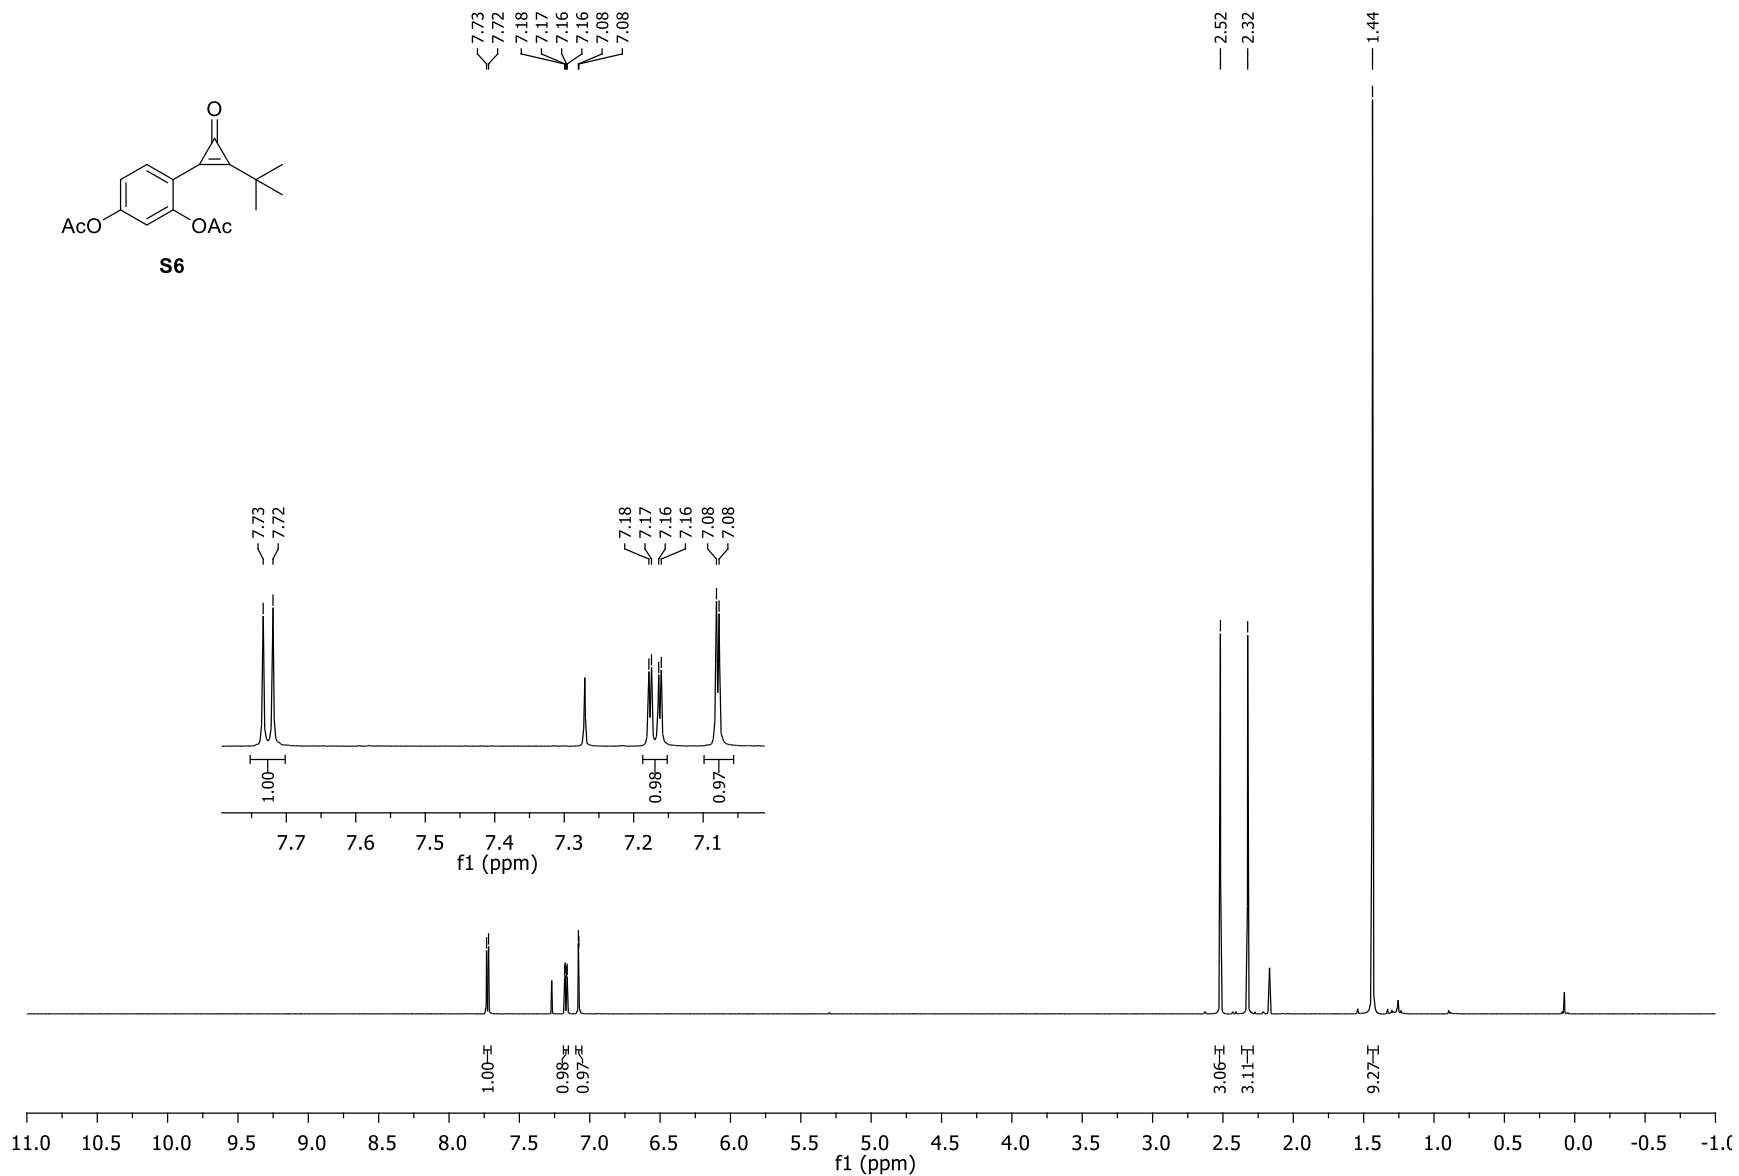

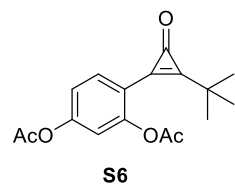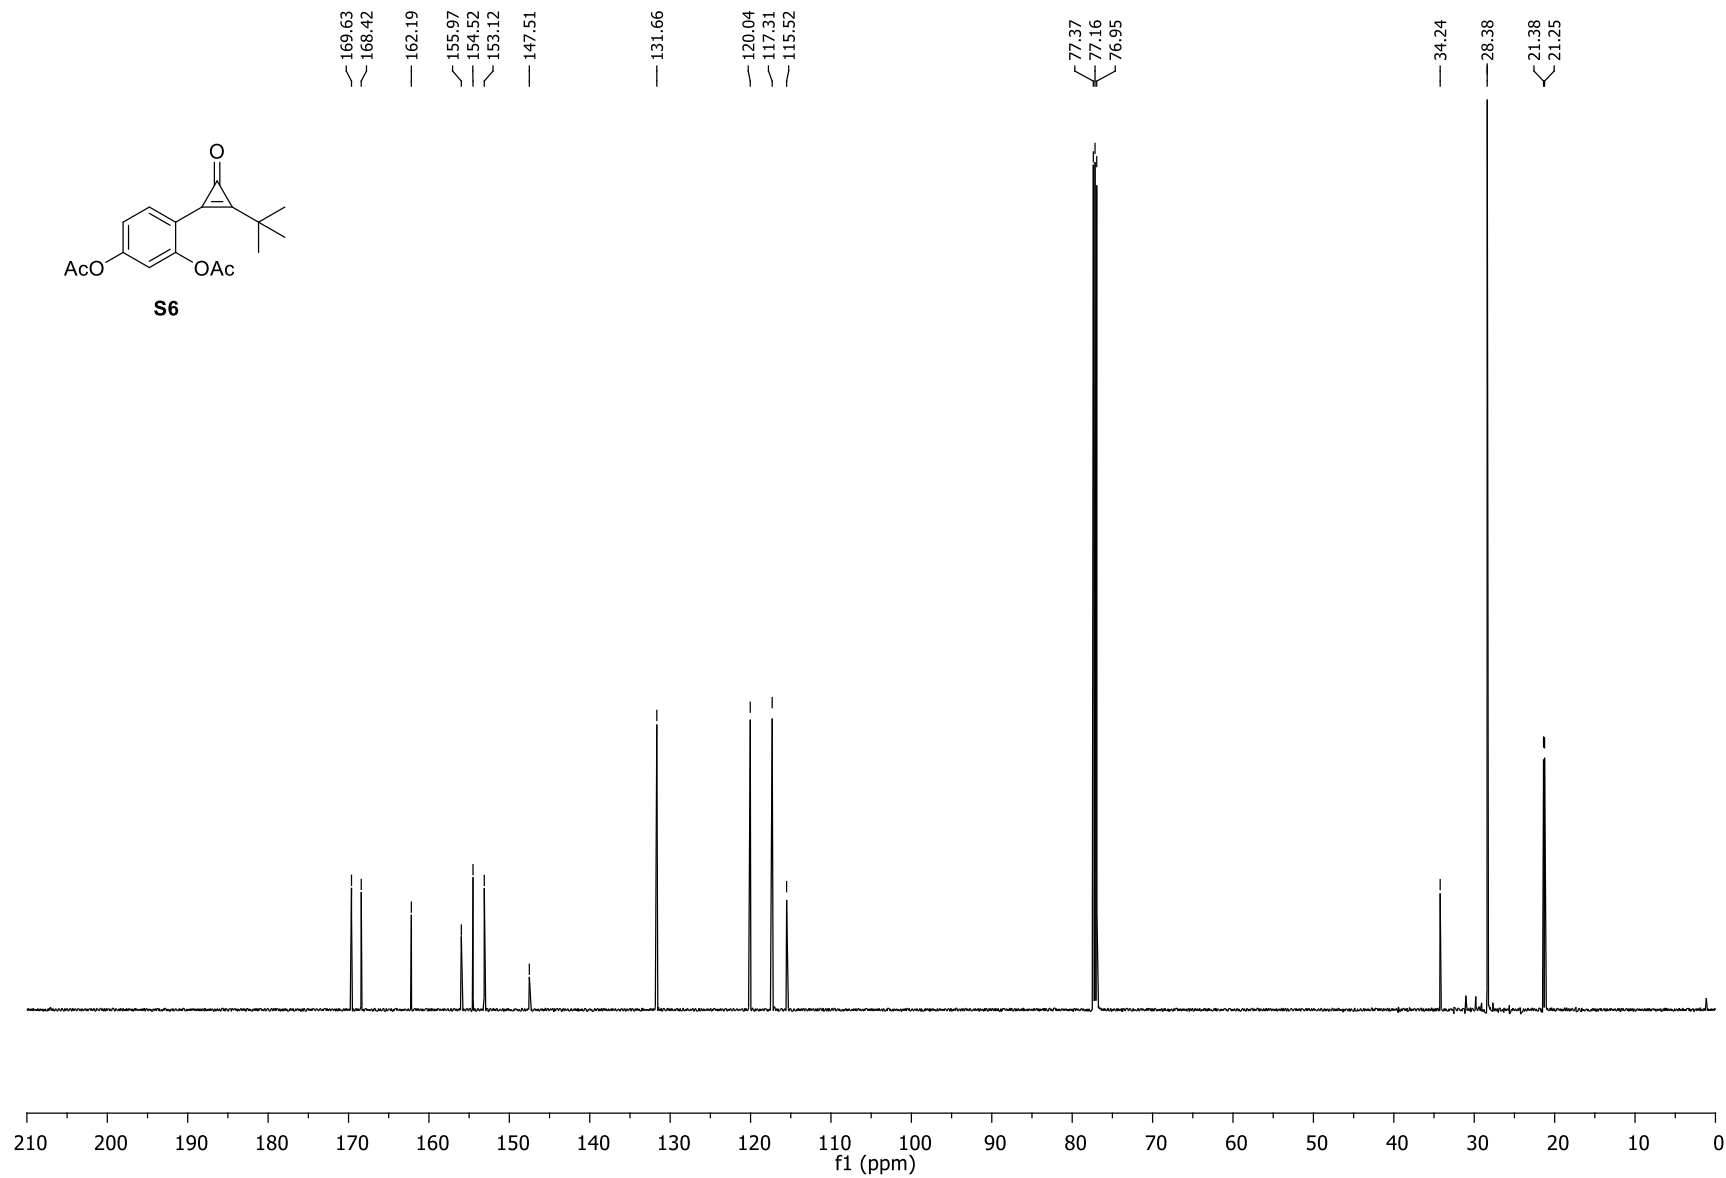

S59

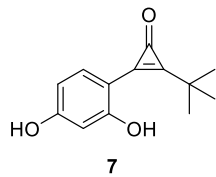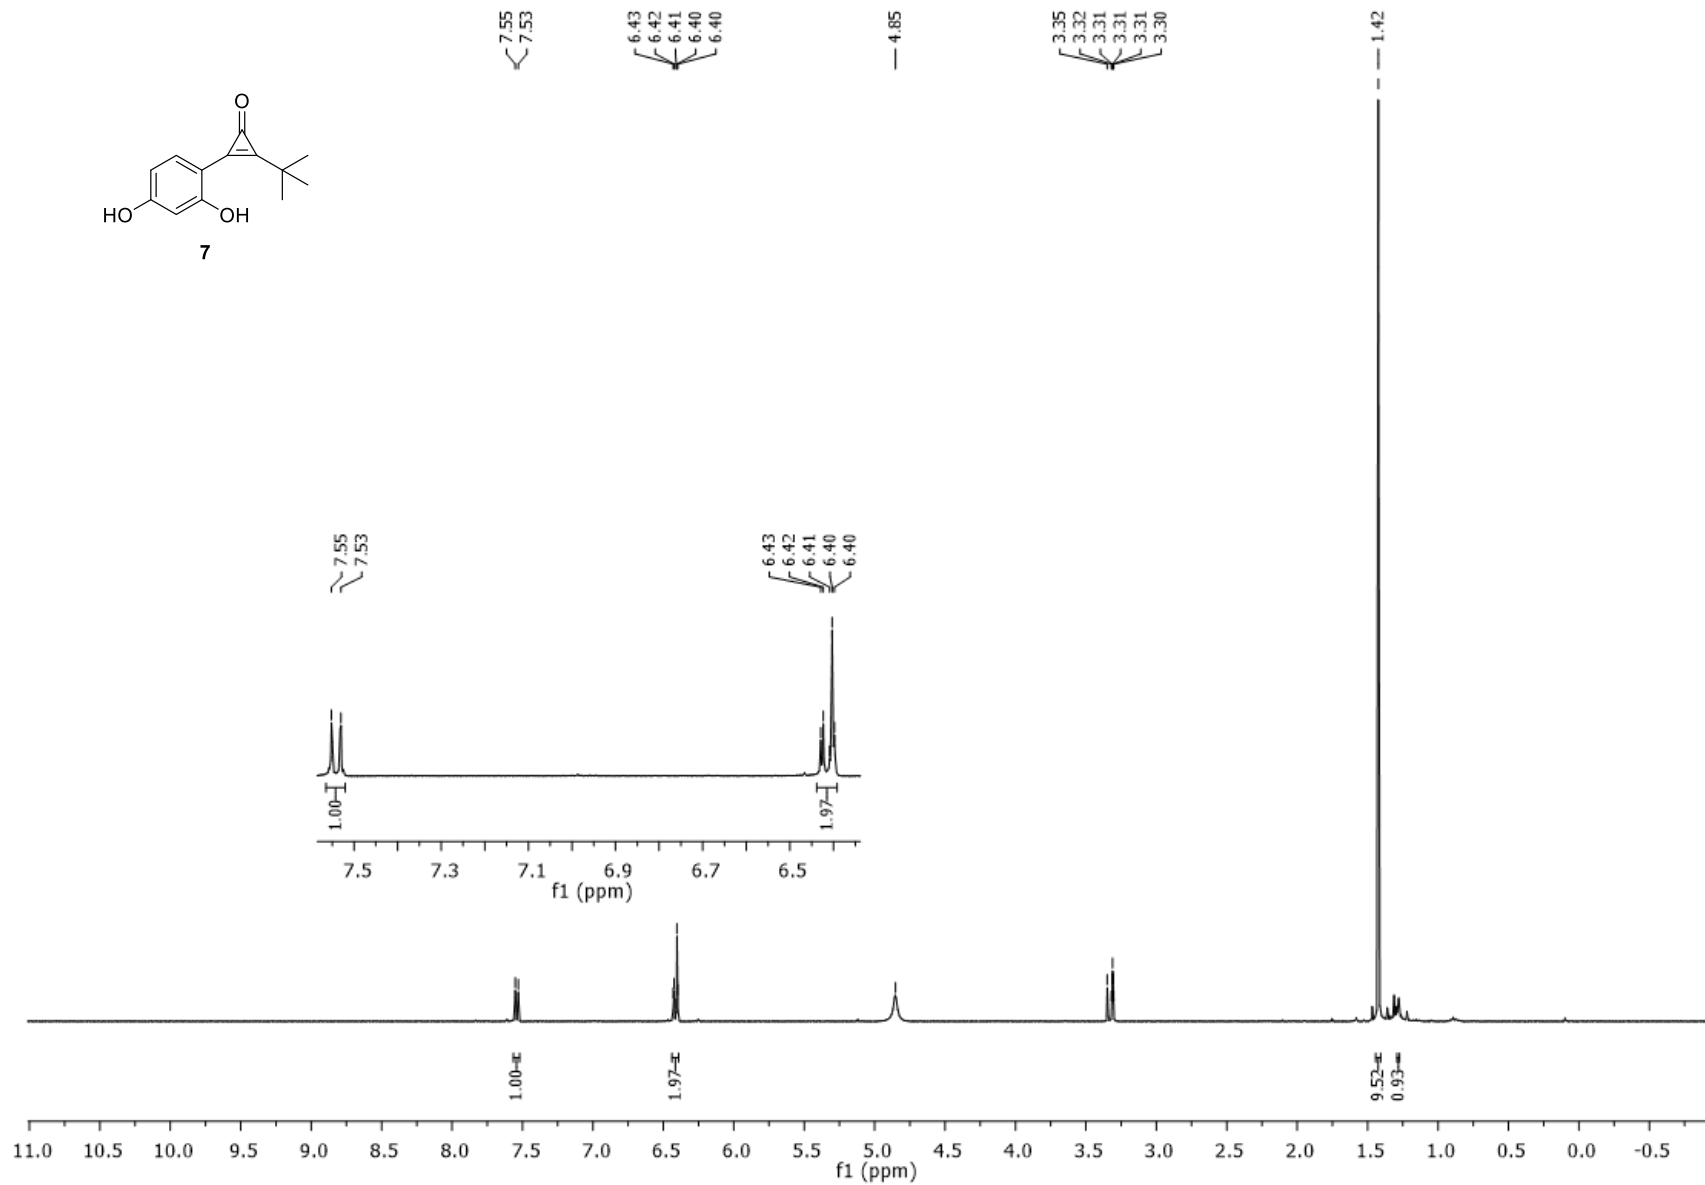

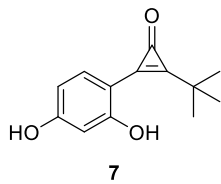

~ 165.83  
 ~ 161.75  
 ~ 159.91  
 — 153.41  
 — 148.85  
 — 136.82

— 109.27  
 ~ 104.07  
 ~ 103.31

49.43  
 49.28  
 49.14  
 49.00  
 48.86  
 48.72  
 48.57  
 — 34.76  
 — 28.71

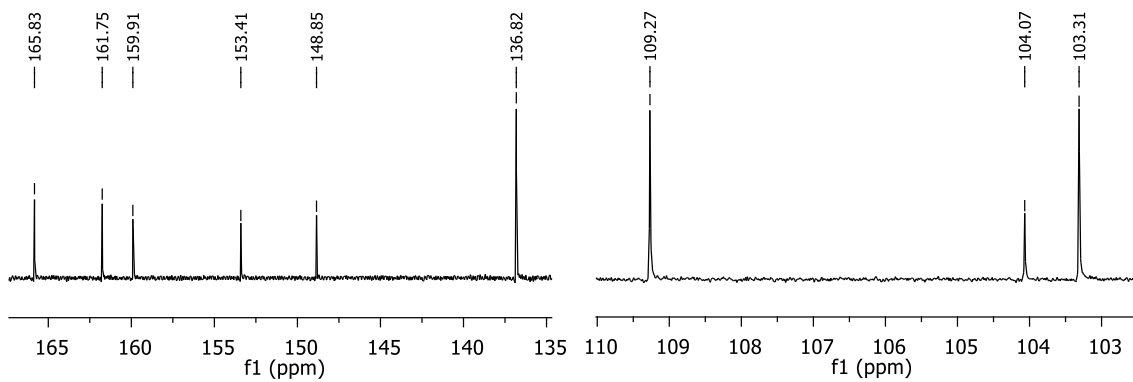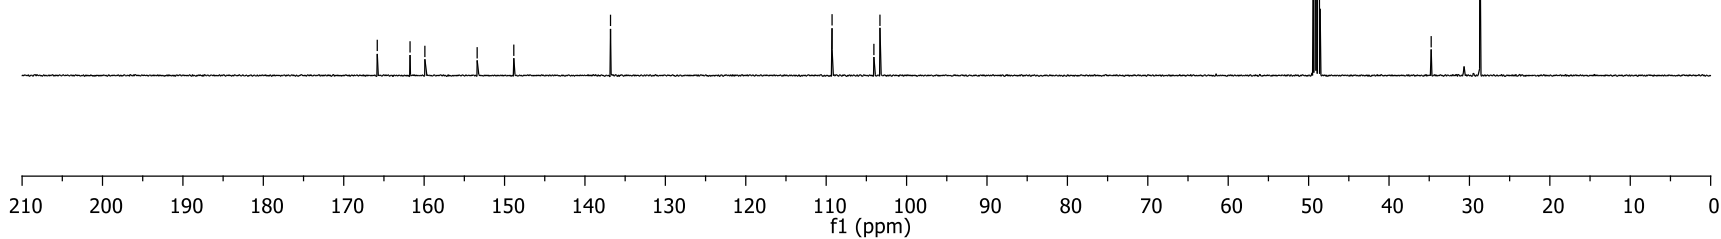

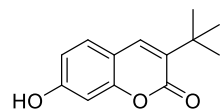

9

7.71  
7.55  
7.36  
7.34  
7.08  
7.07  
6.88  
6.87  
6.86  
6.85

1.40

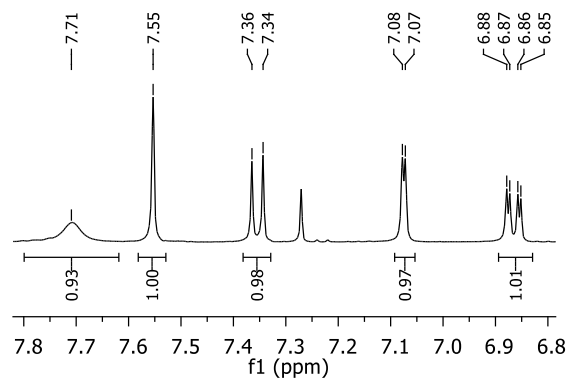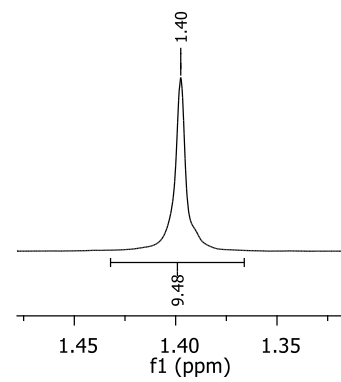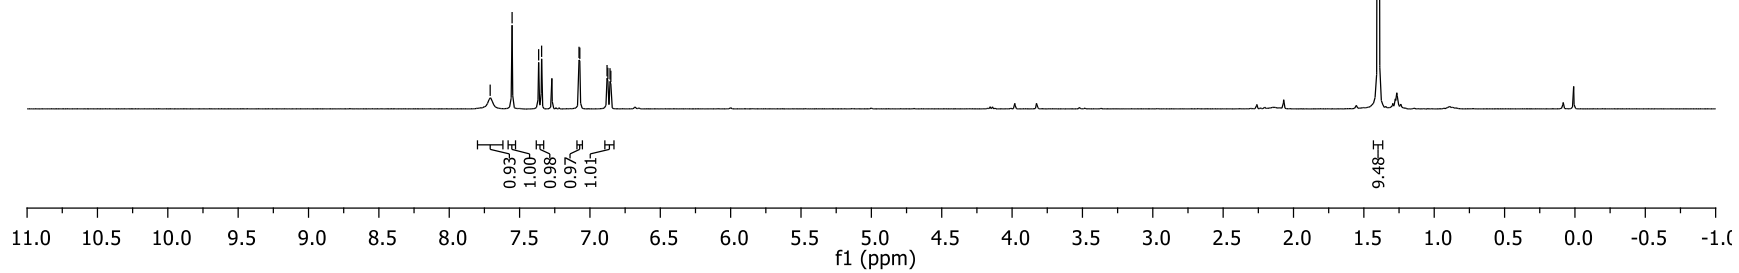

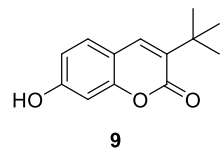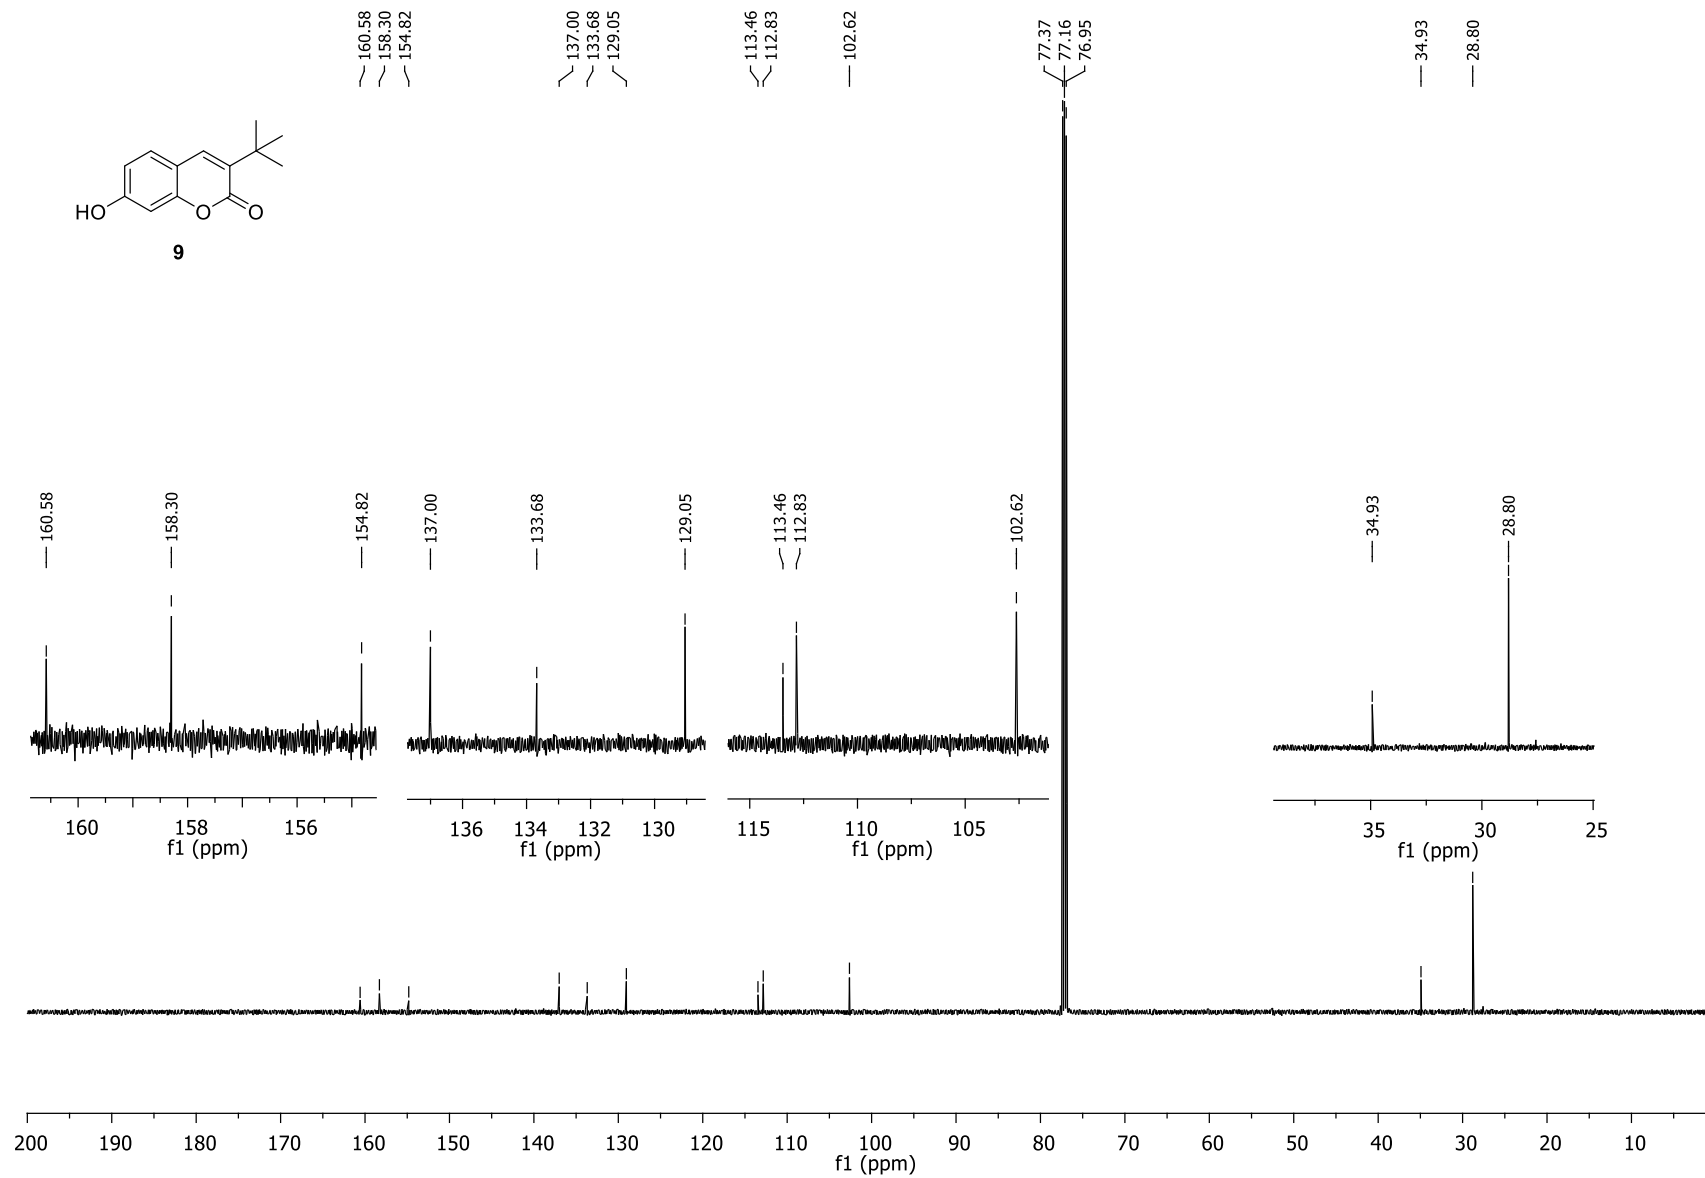

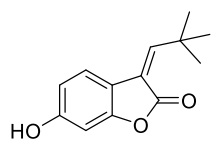

+

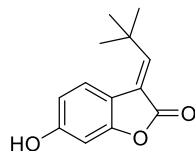

10

7.58  
7.58  
7.56  
7.56  
7.24  
7.24  
7.23  
7.22  
7.22  
7.09  
6.90  
6.70  
6.68  
6.68  
6.64  
6.63  
6.62  
6.62  
6.61

1.39  
1.37

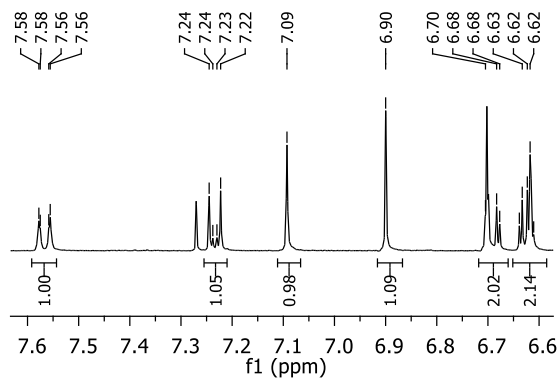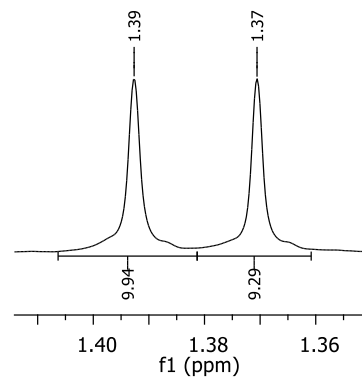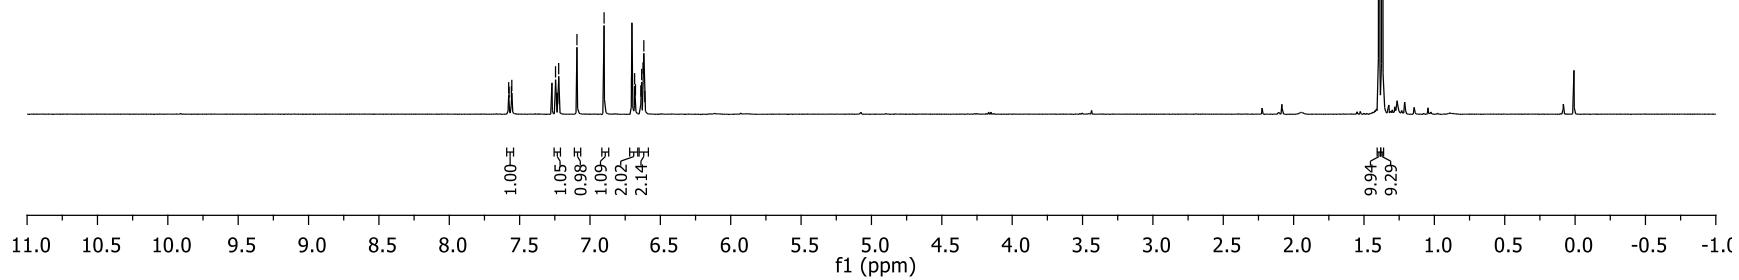



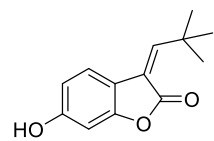

+

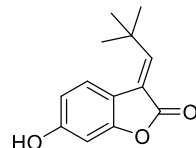

10

170.72  
165.93  
157.88  
157.51  
155.75  
154.41  
154.13  
154.01

127.36  
122.14  
121.80  
120.37  
117.79  
113.92  
111.35  
111.19

99.42  
98.90

77.41  
77.16  
76.91

33.99  
33.28  
29.33  
29.05

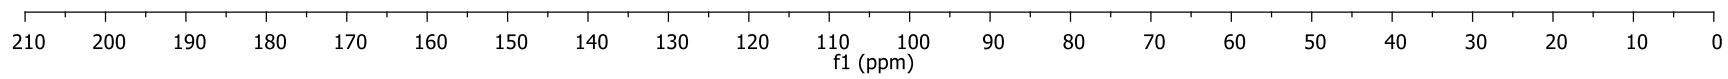

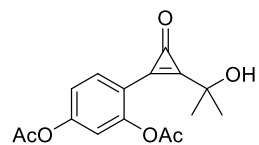

14

8.12 8.10 7.27 7.16 7.15 7.15 7.15 7.13 7.13 7.13 7.13 7.06 7.06 7.06 5.30 4.15 4.13 4.11 4.09 2.50 2.32 2.04 1.64 1.58 1.28 1.26 1.24 0.89

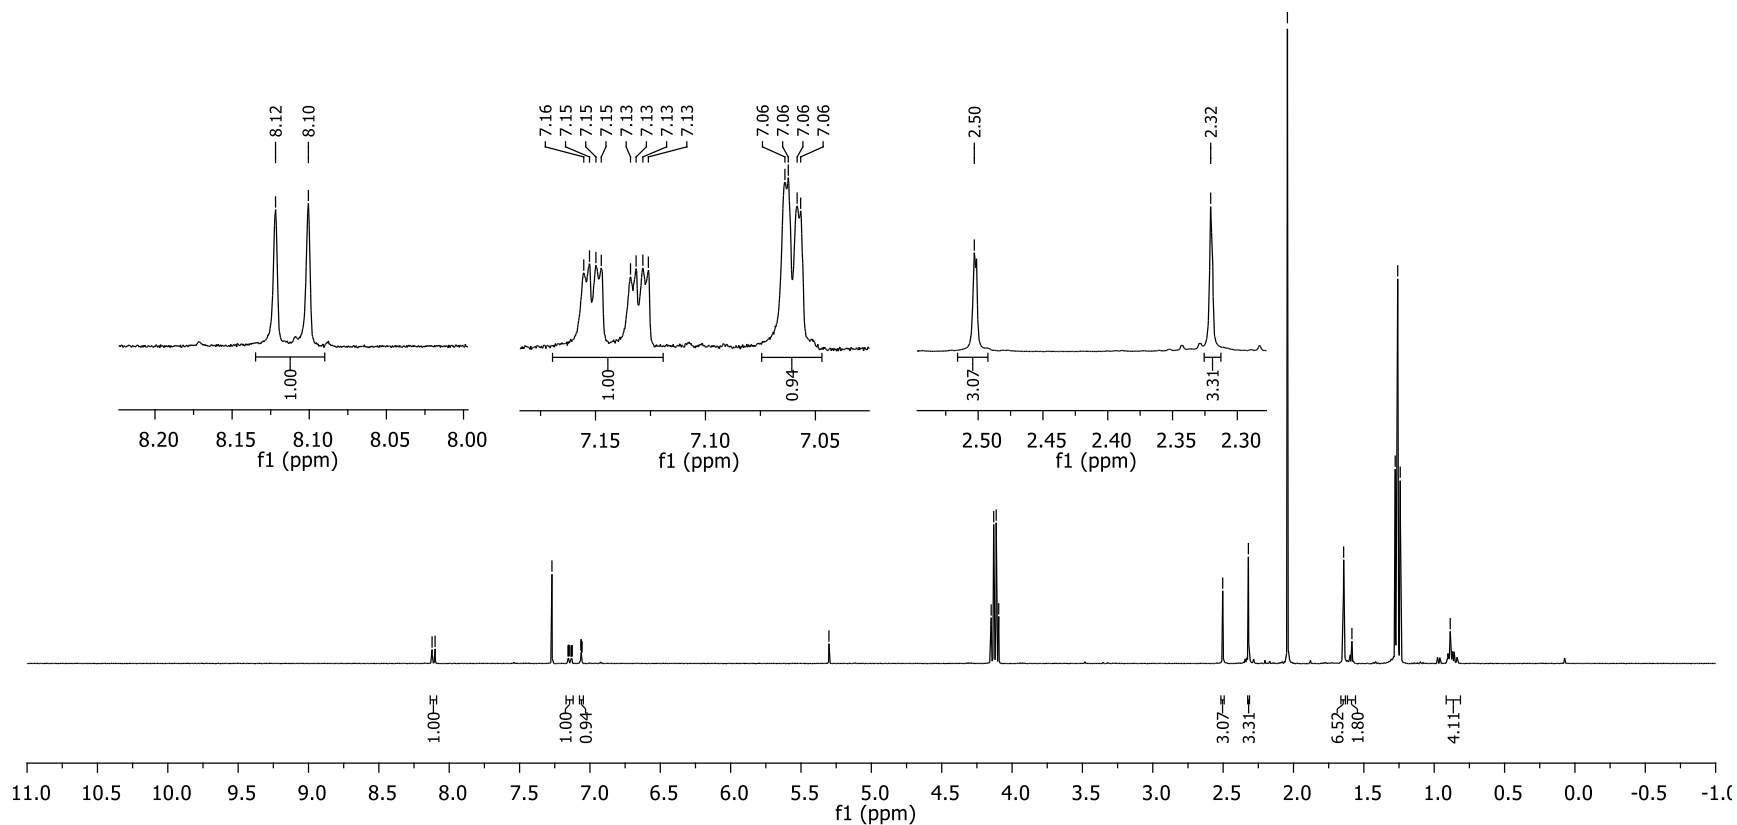

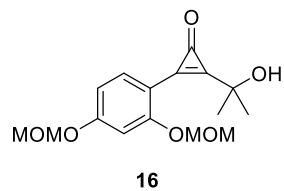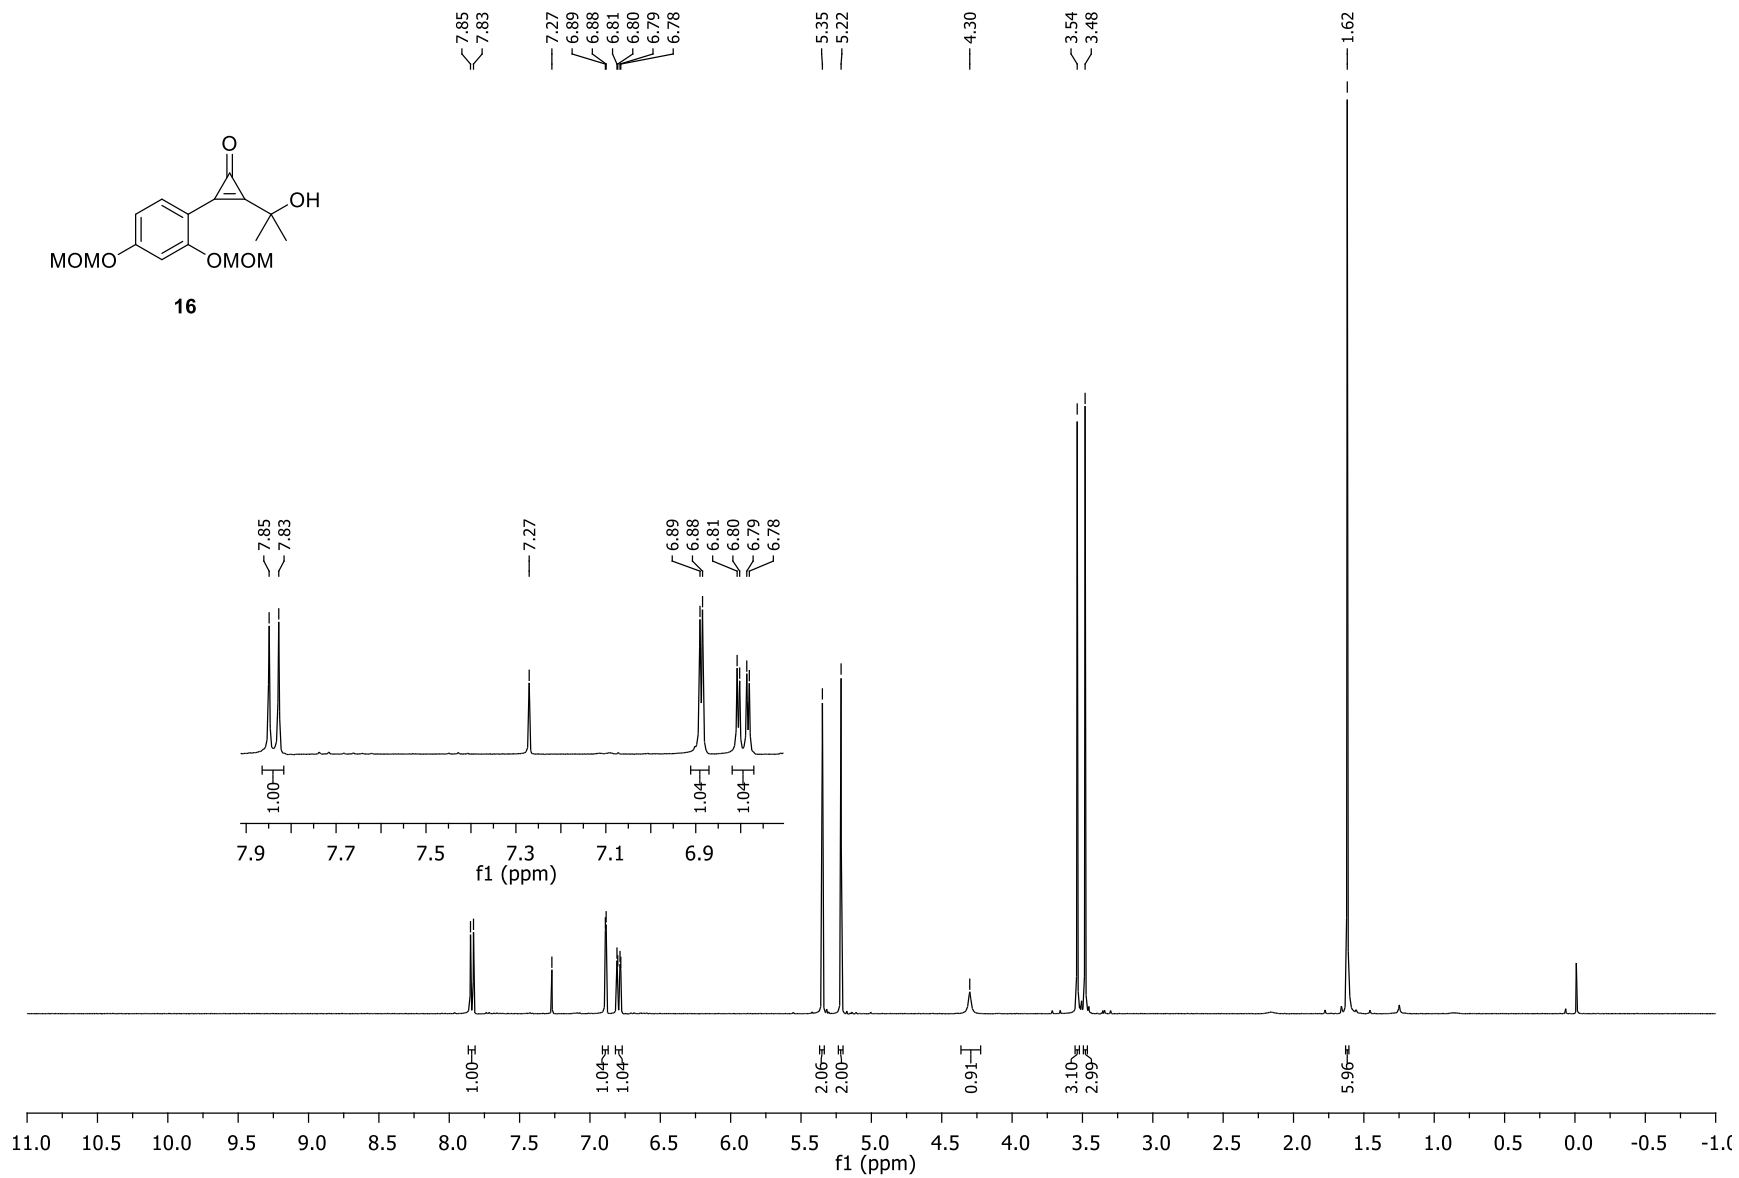

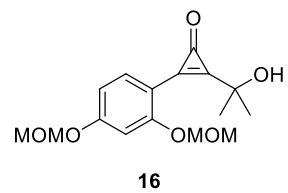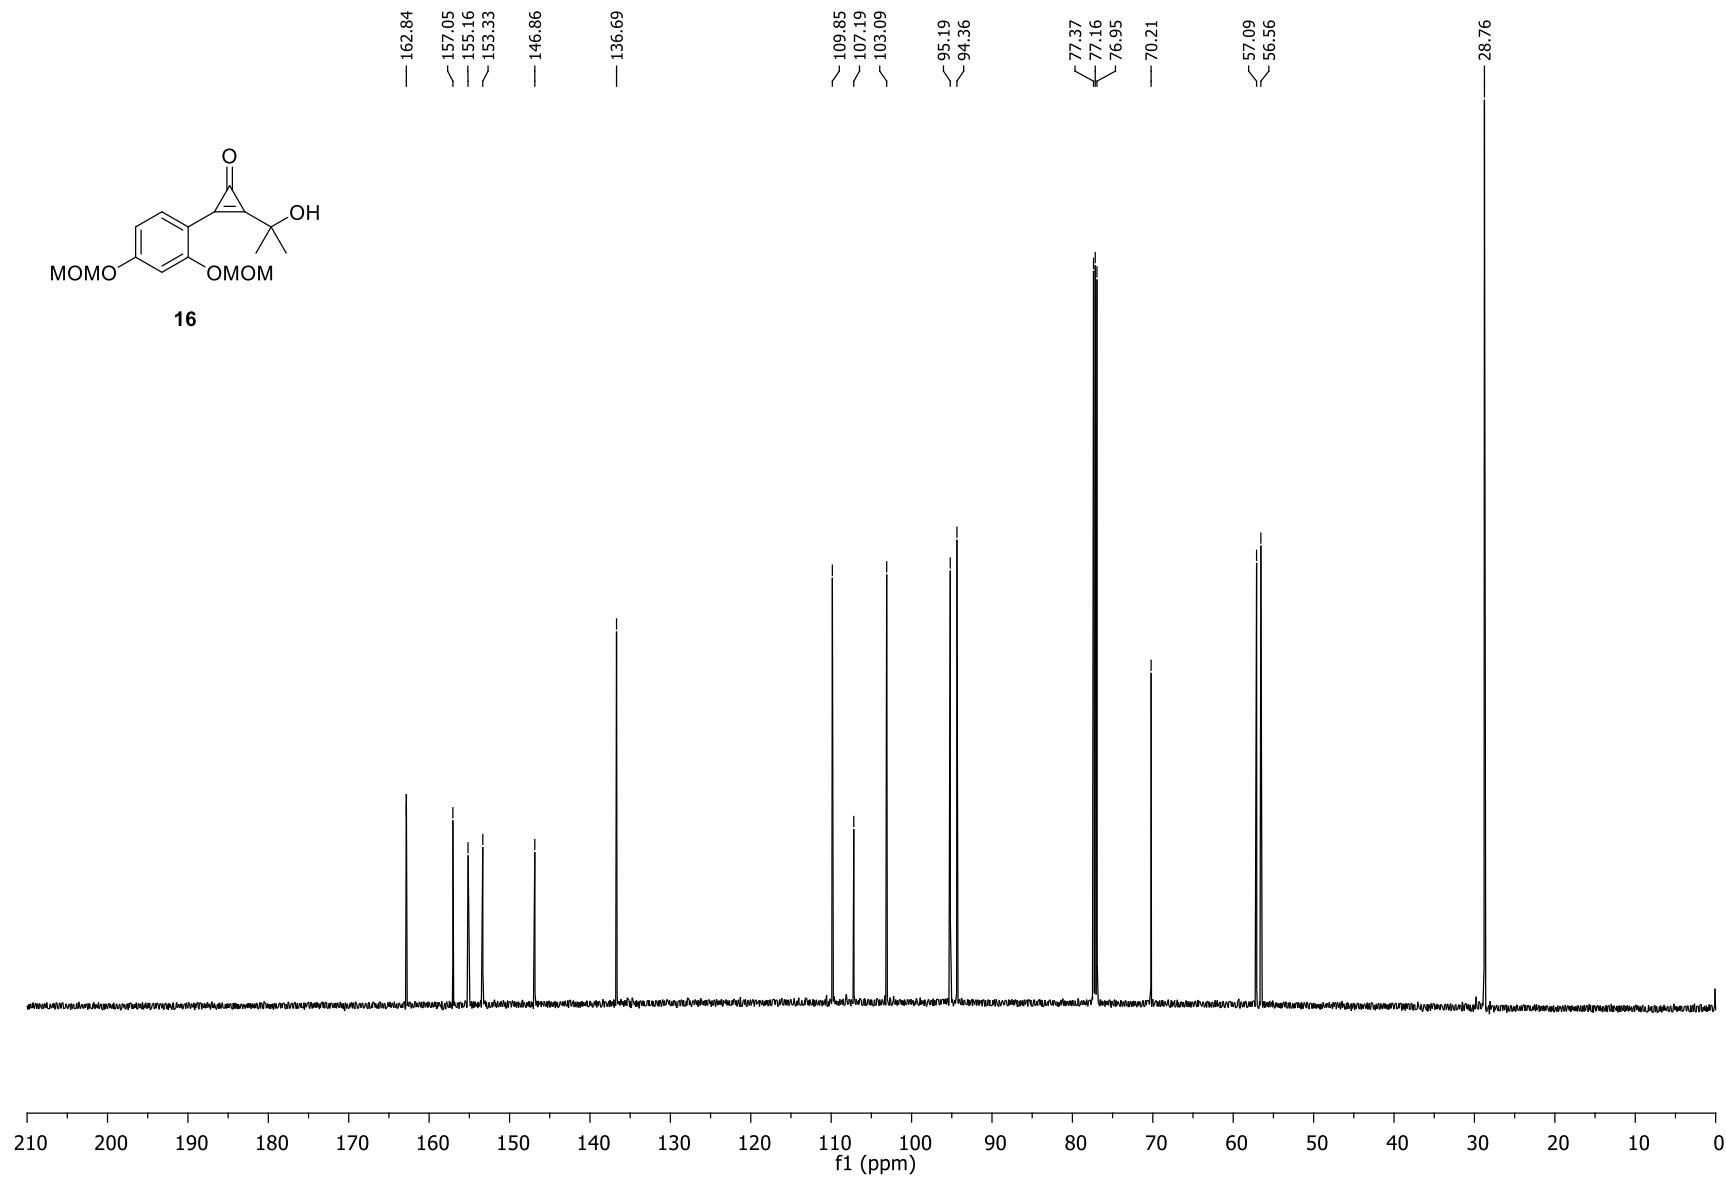

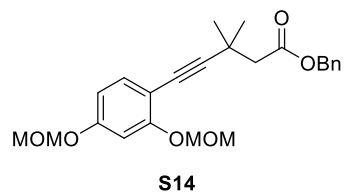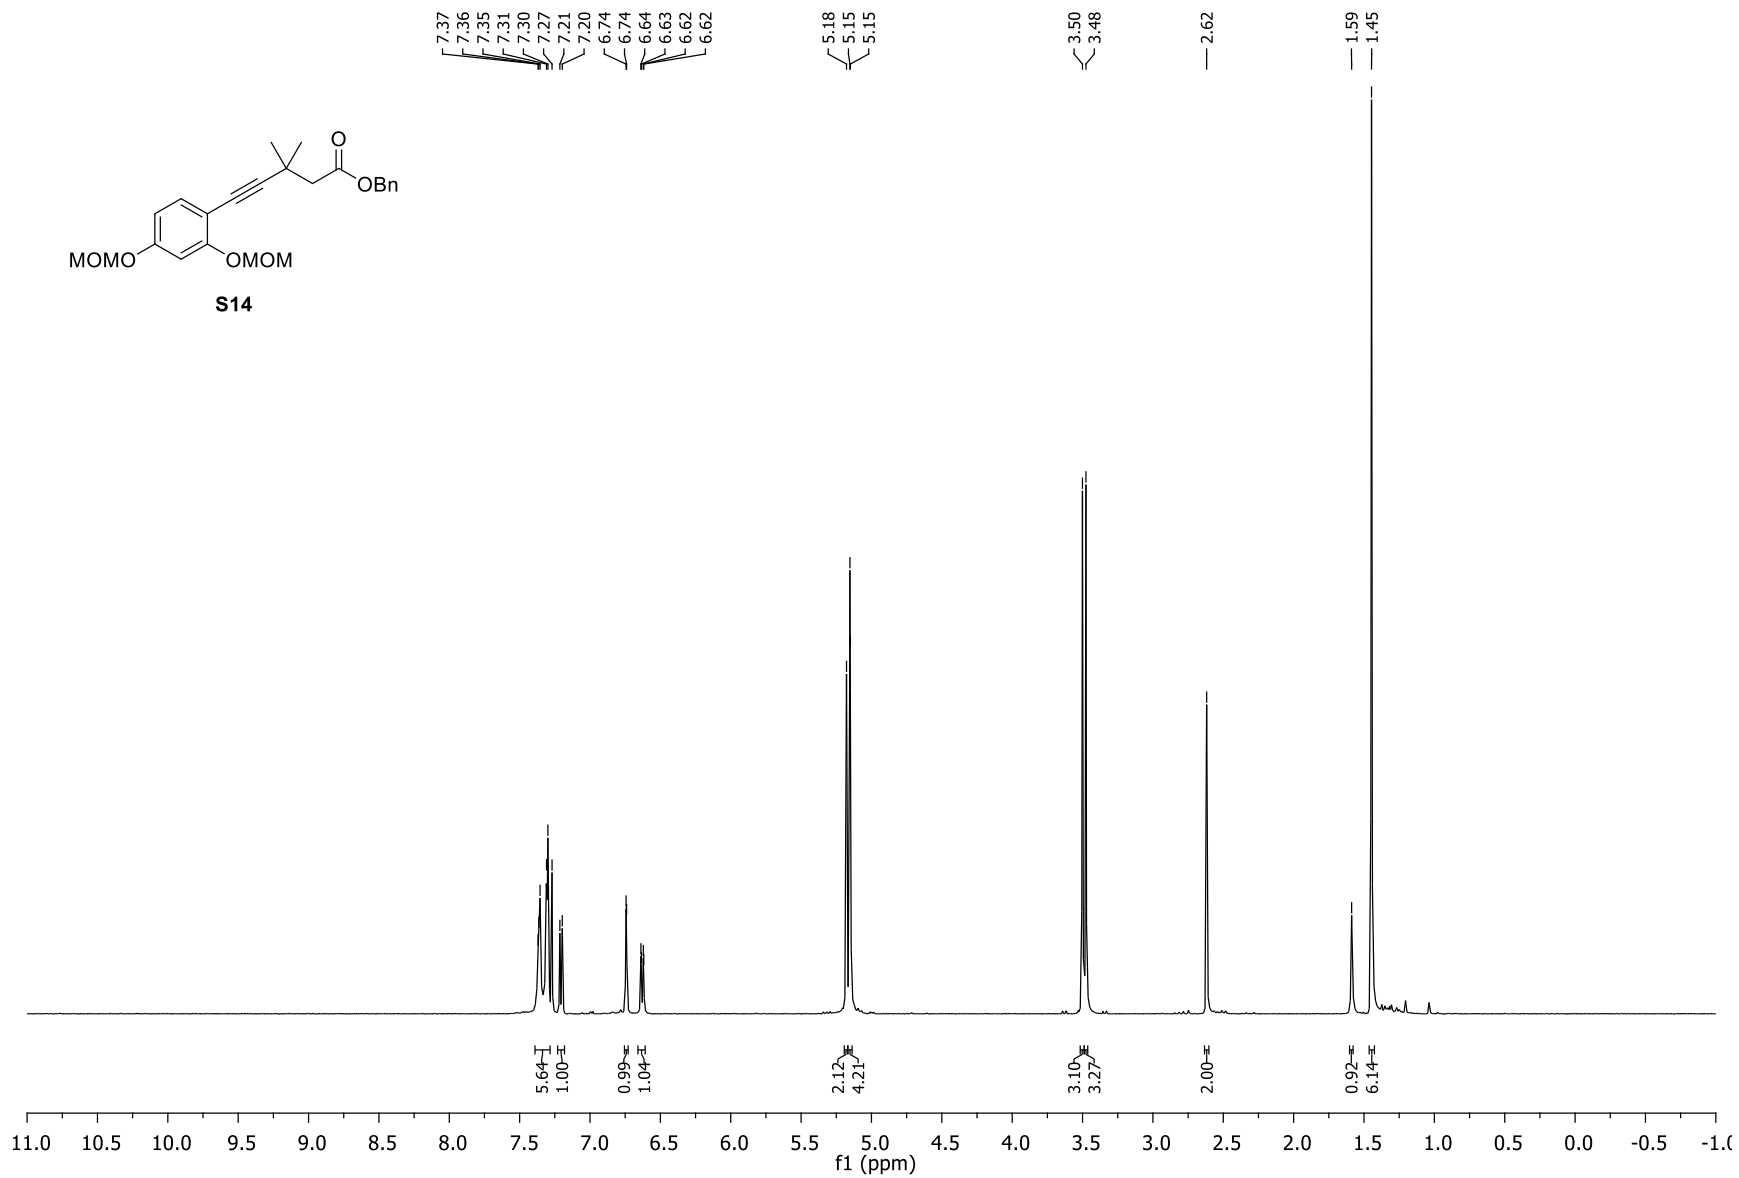

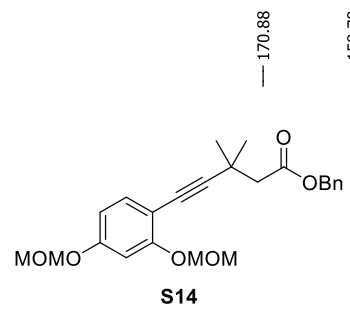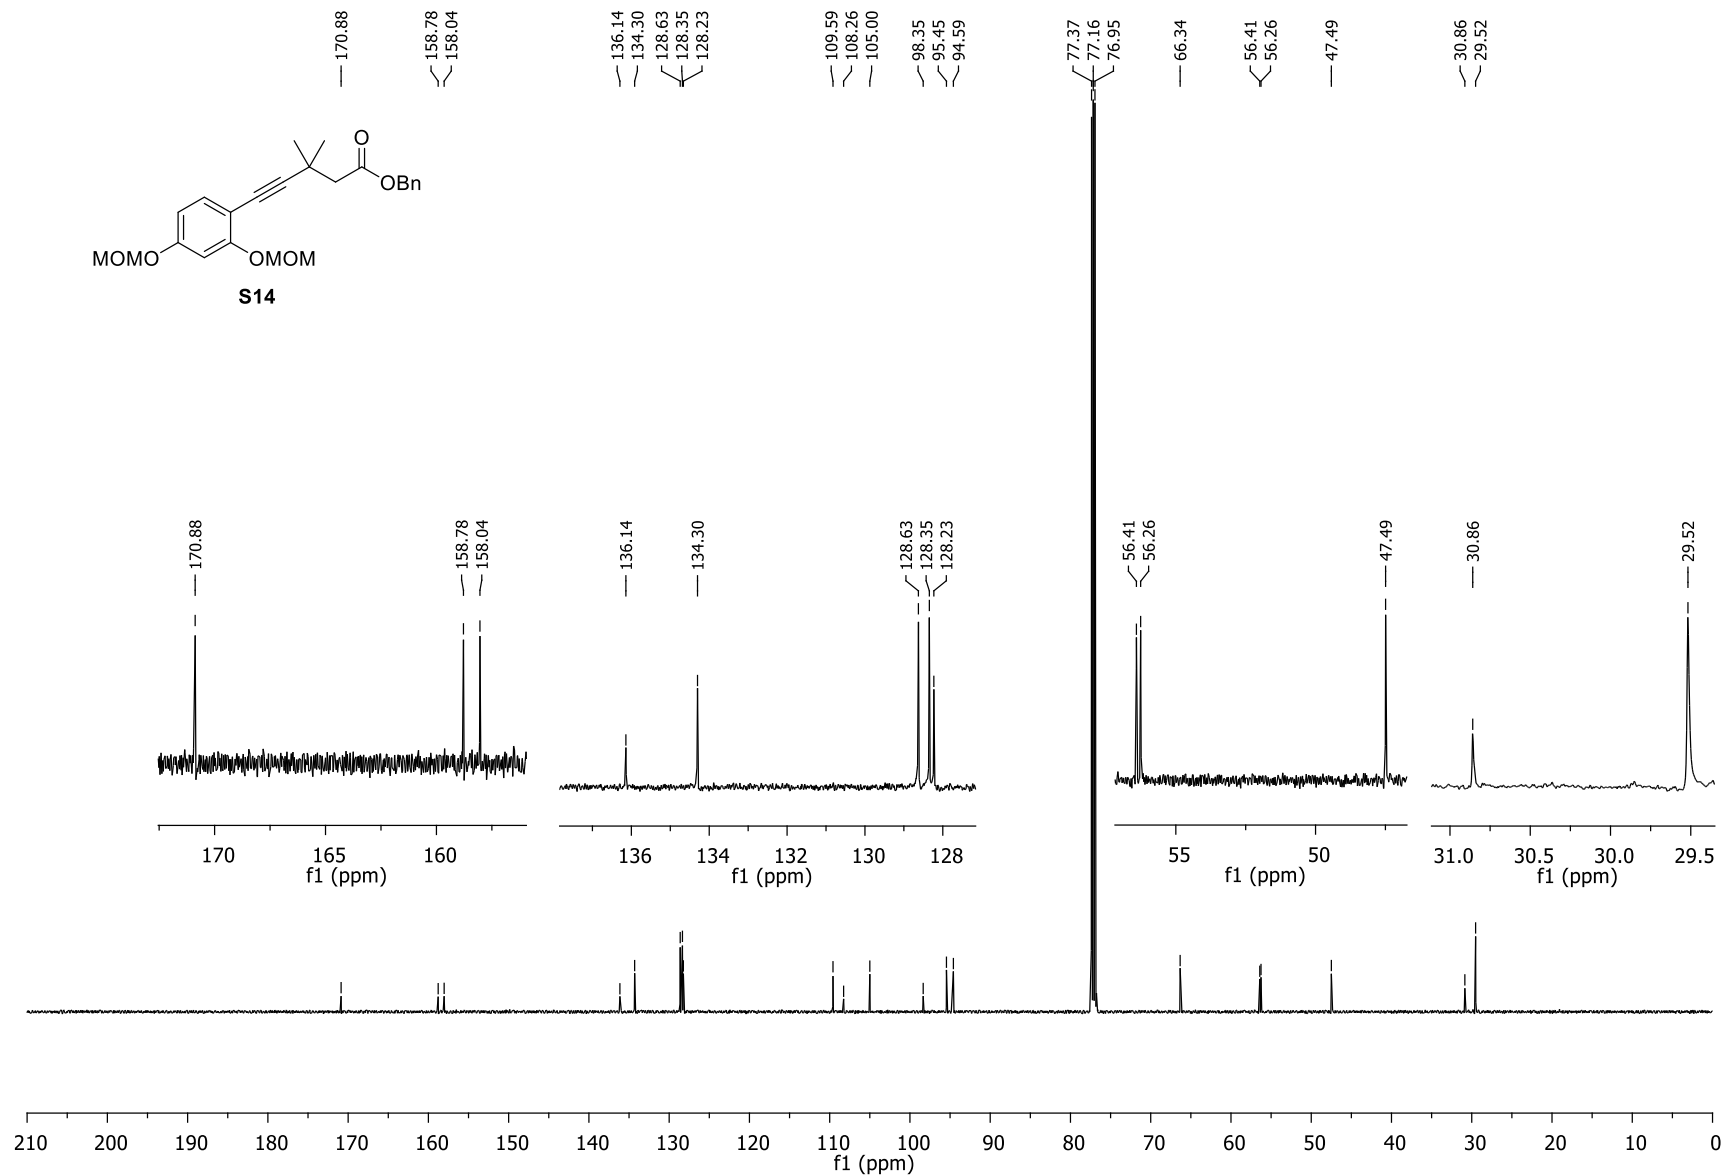

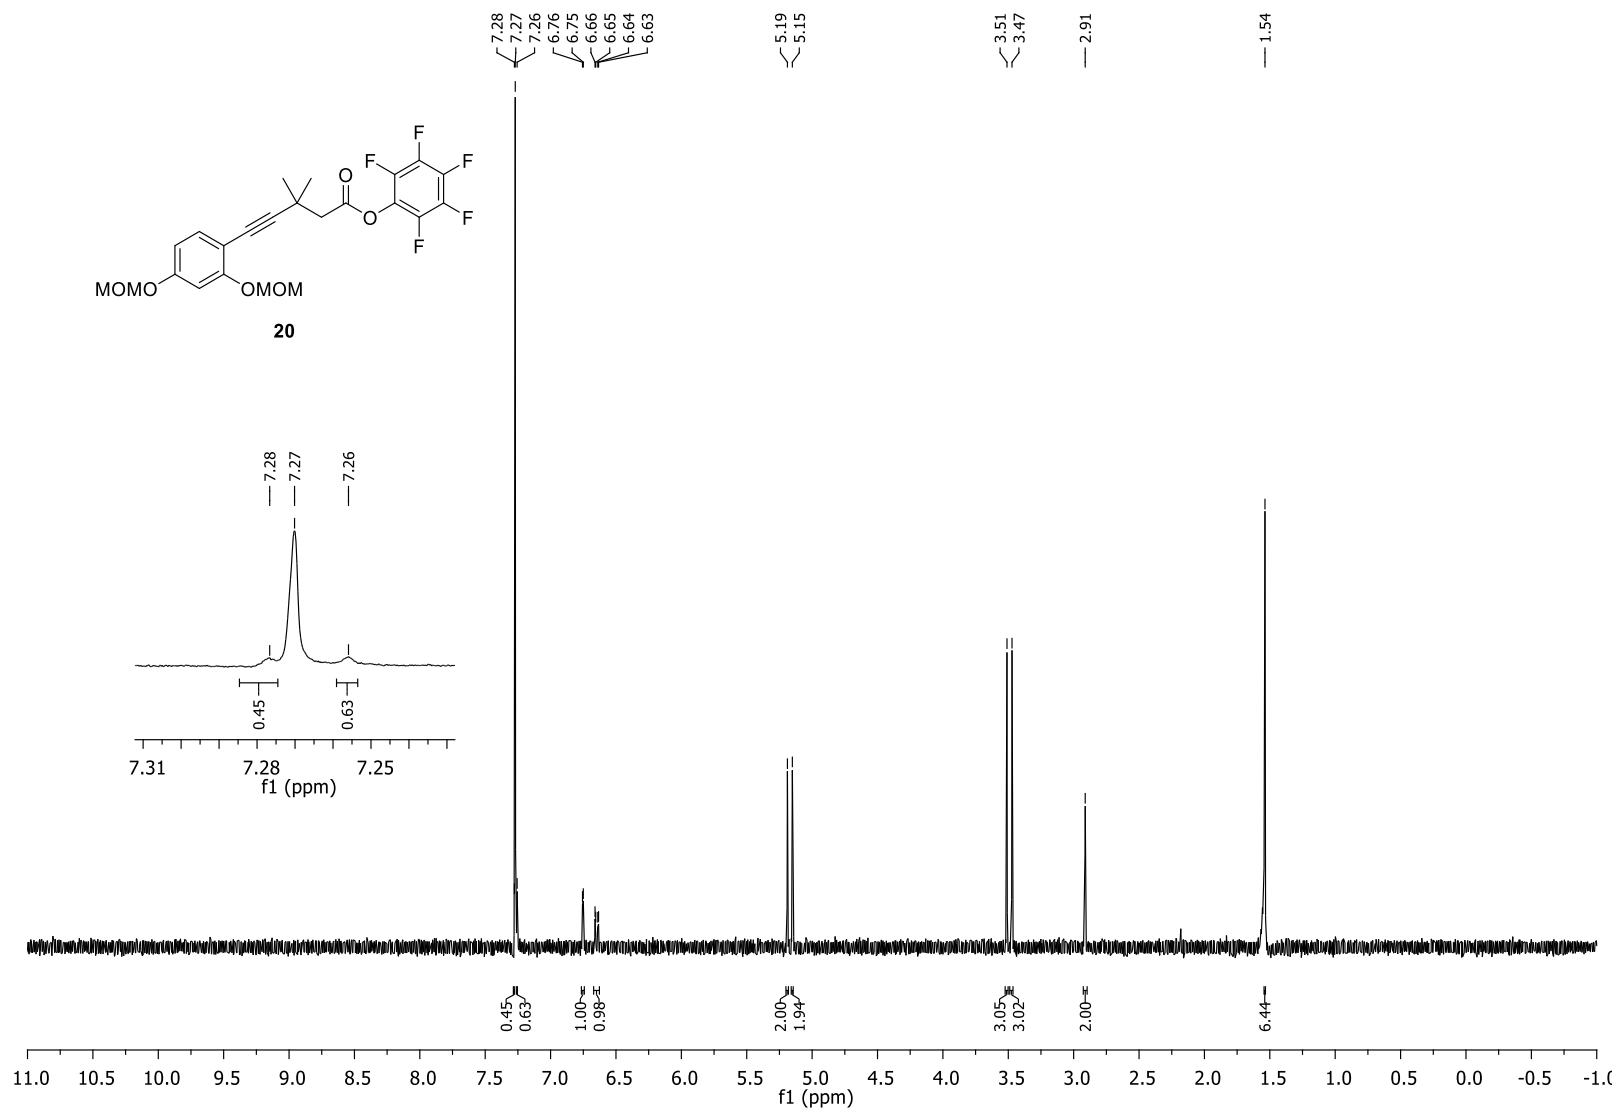

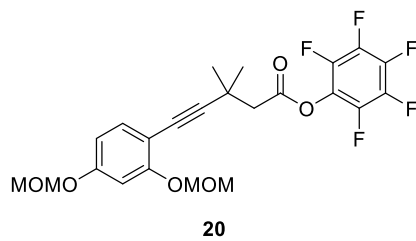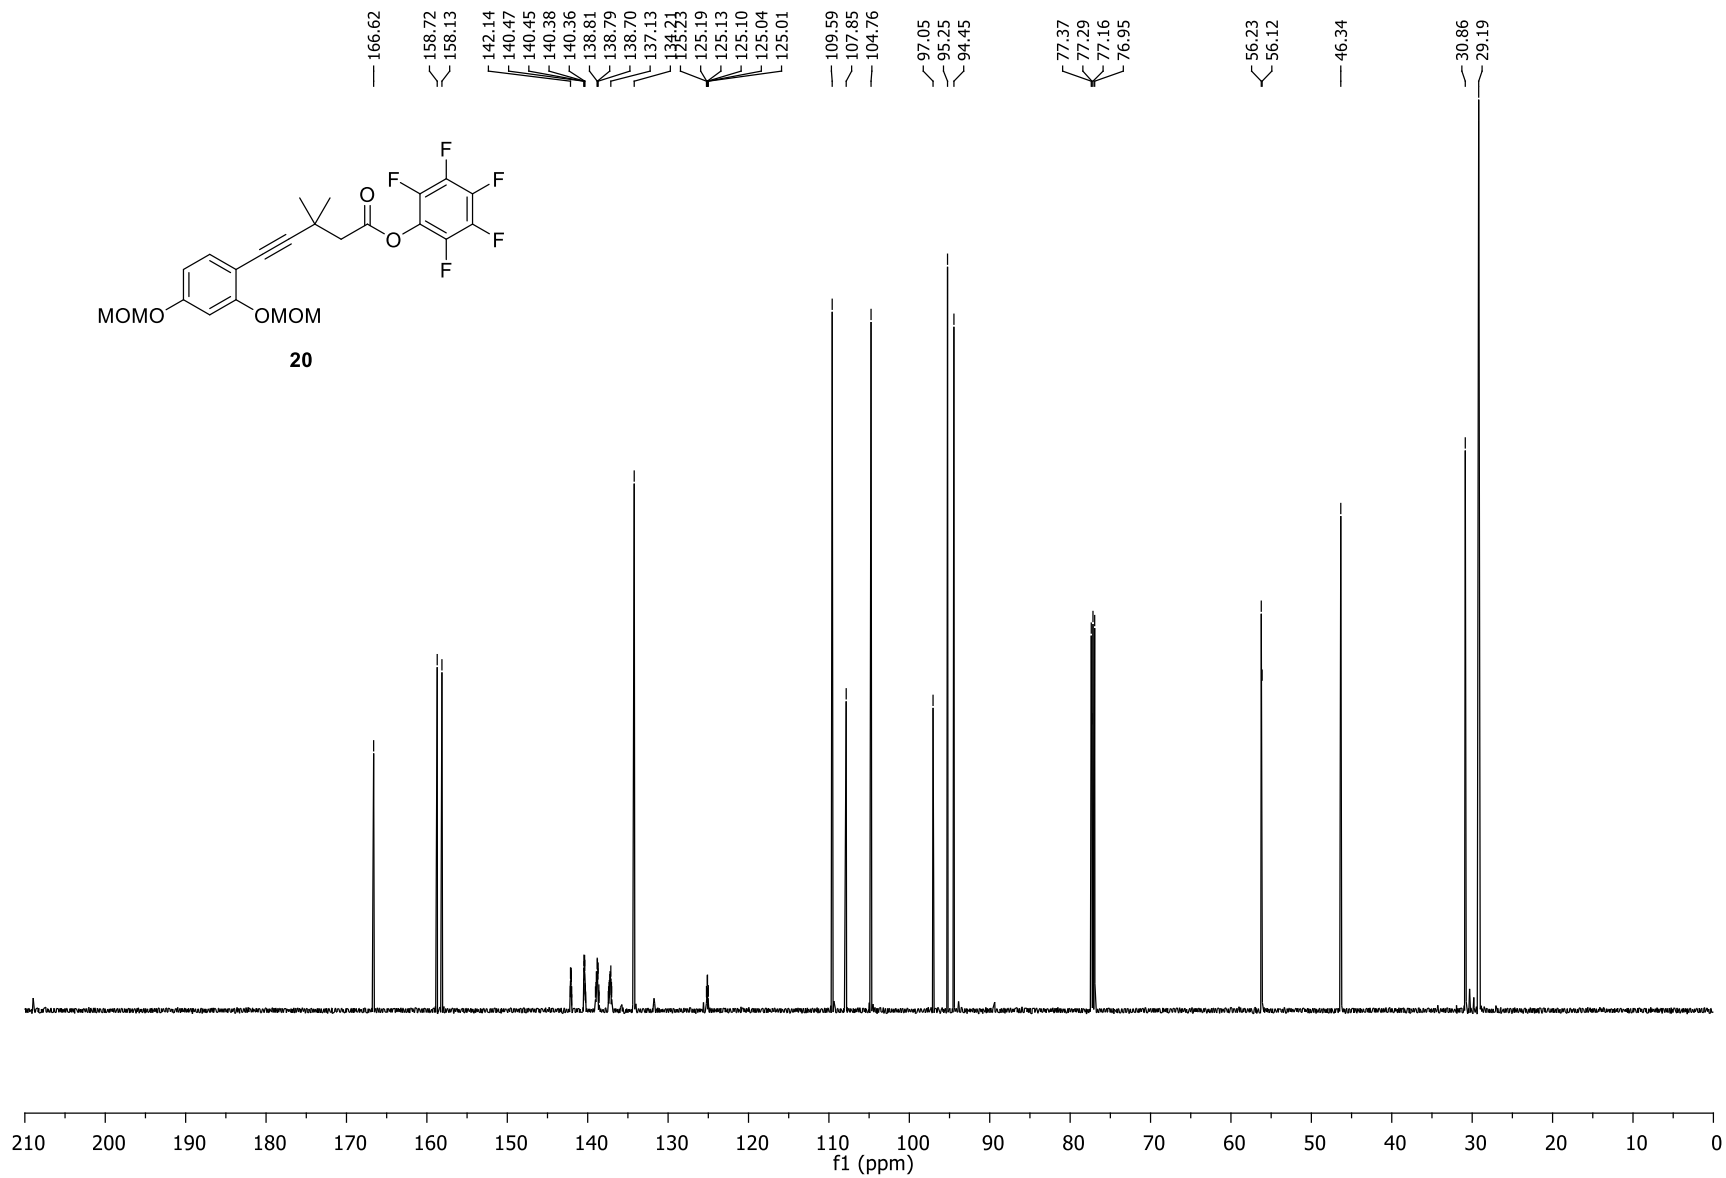



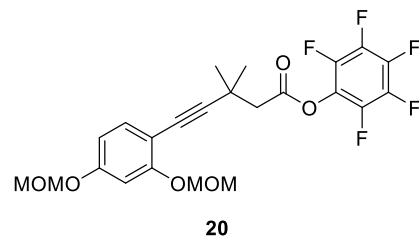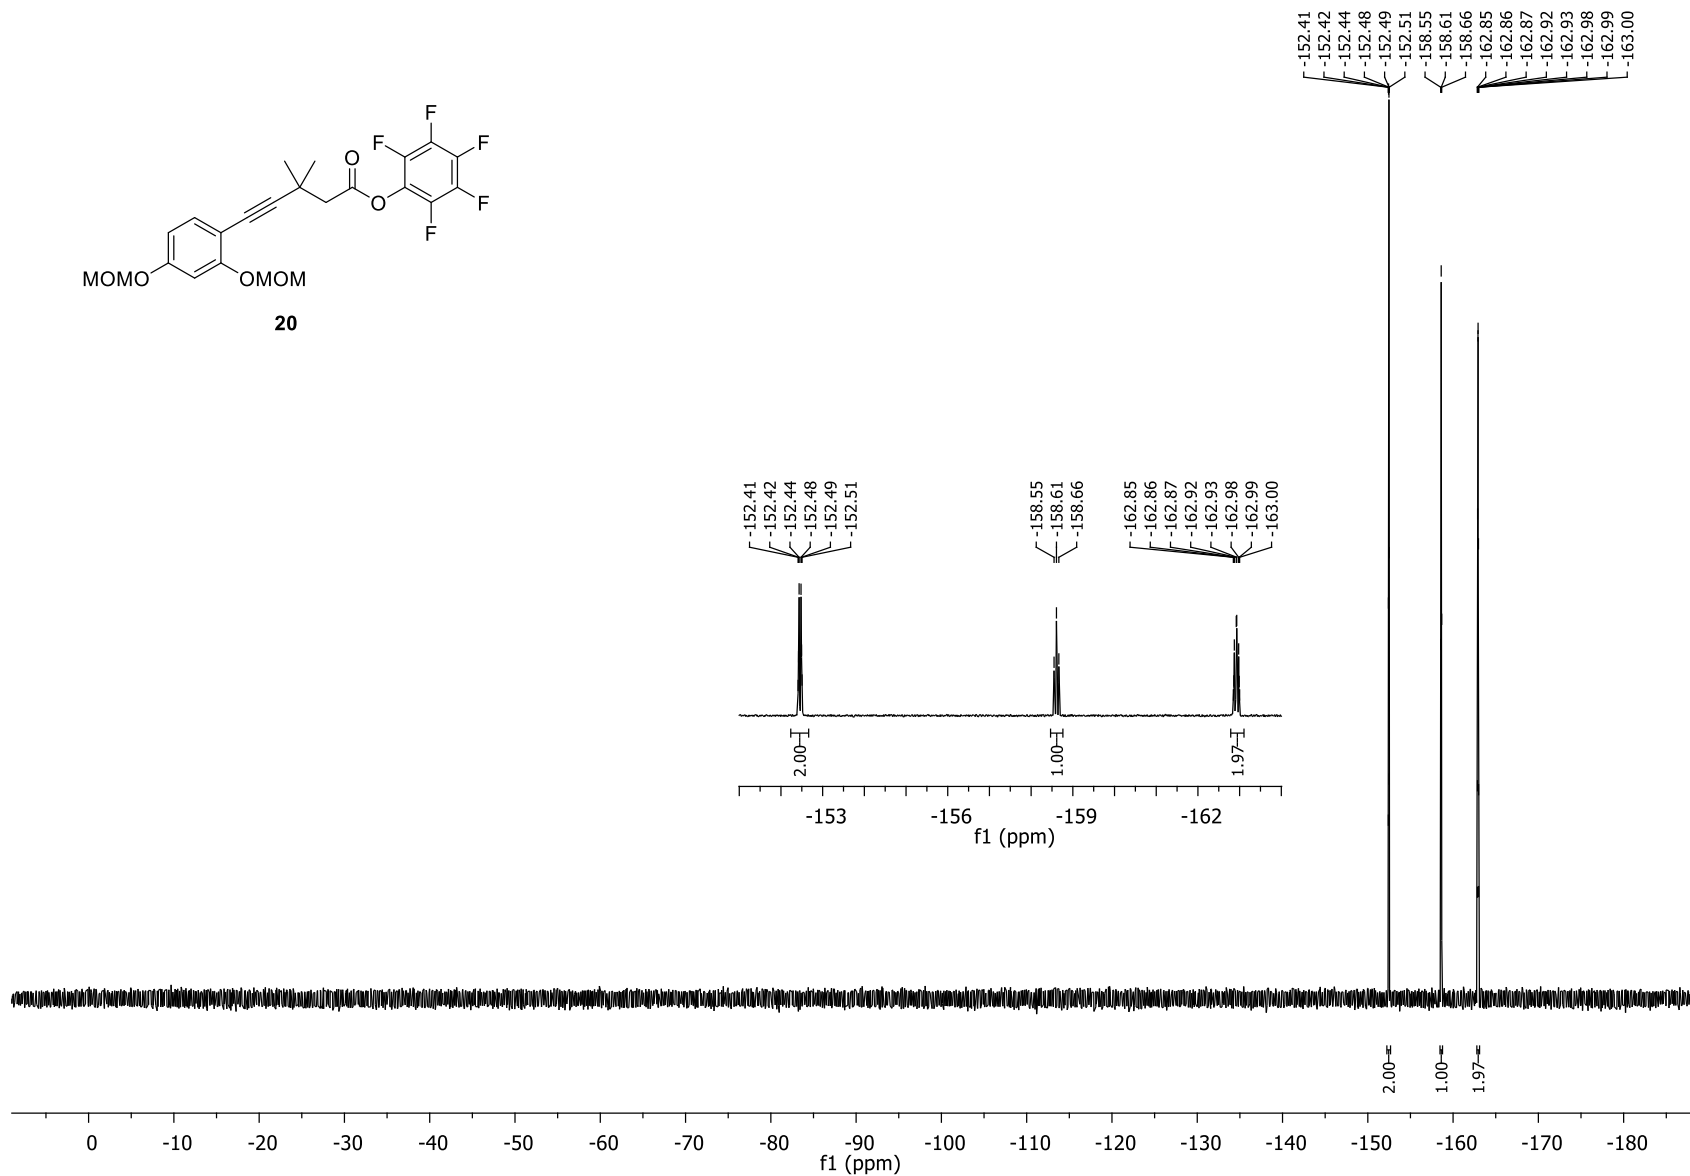

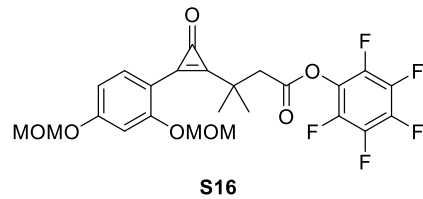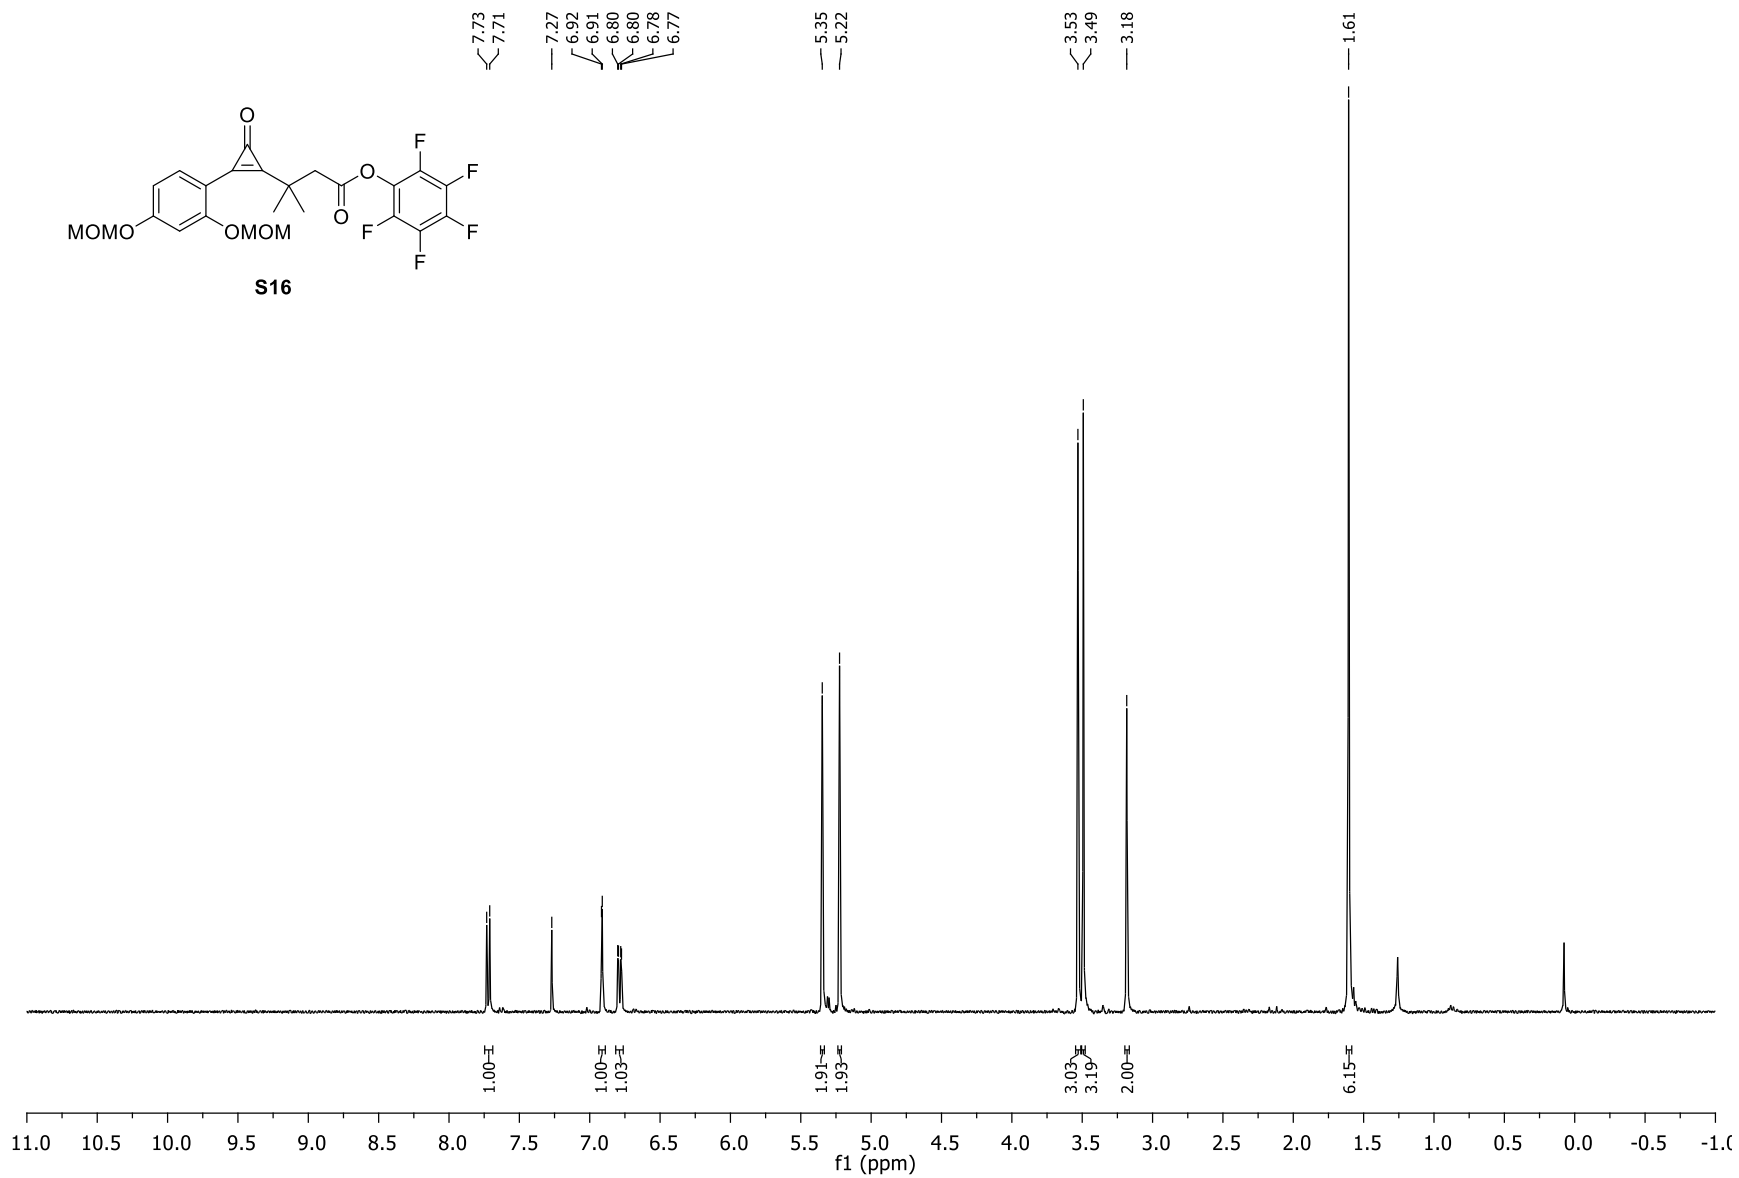

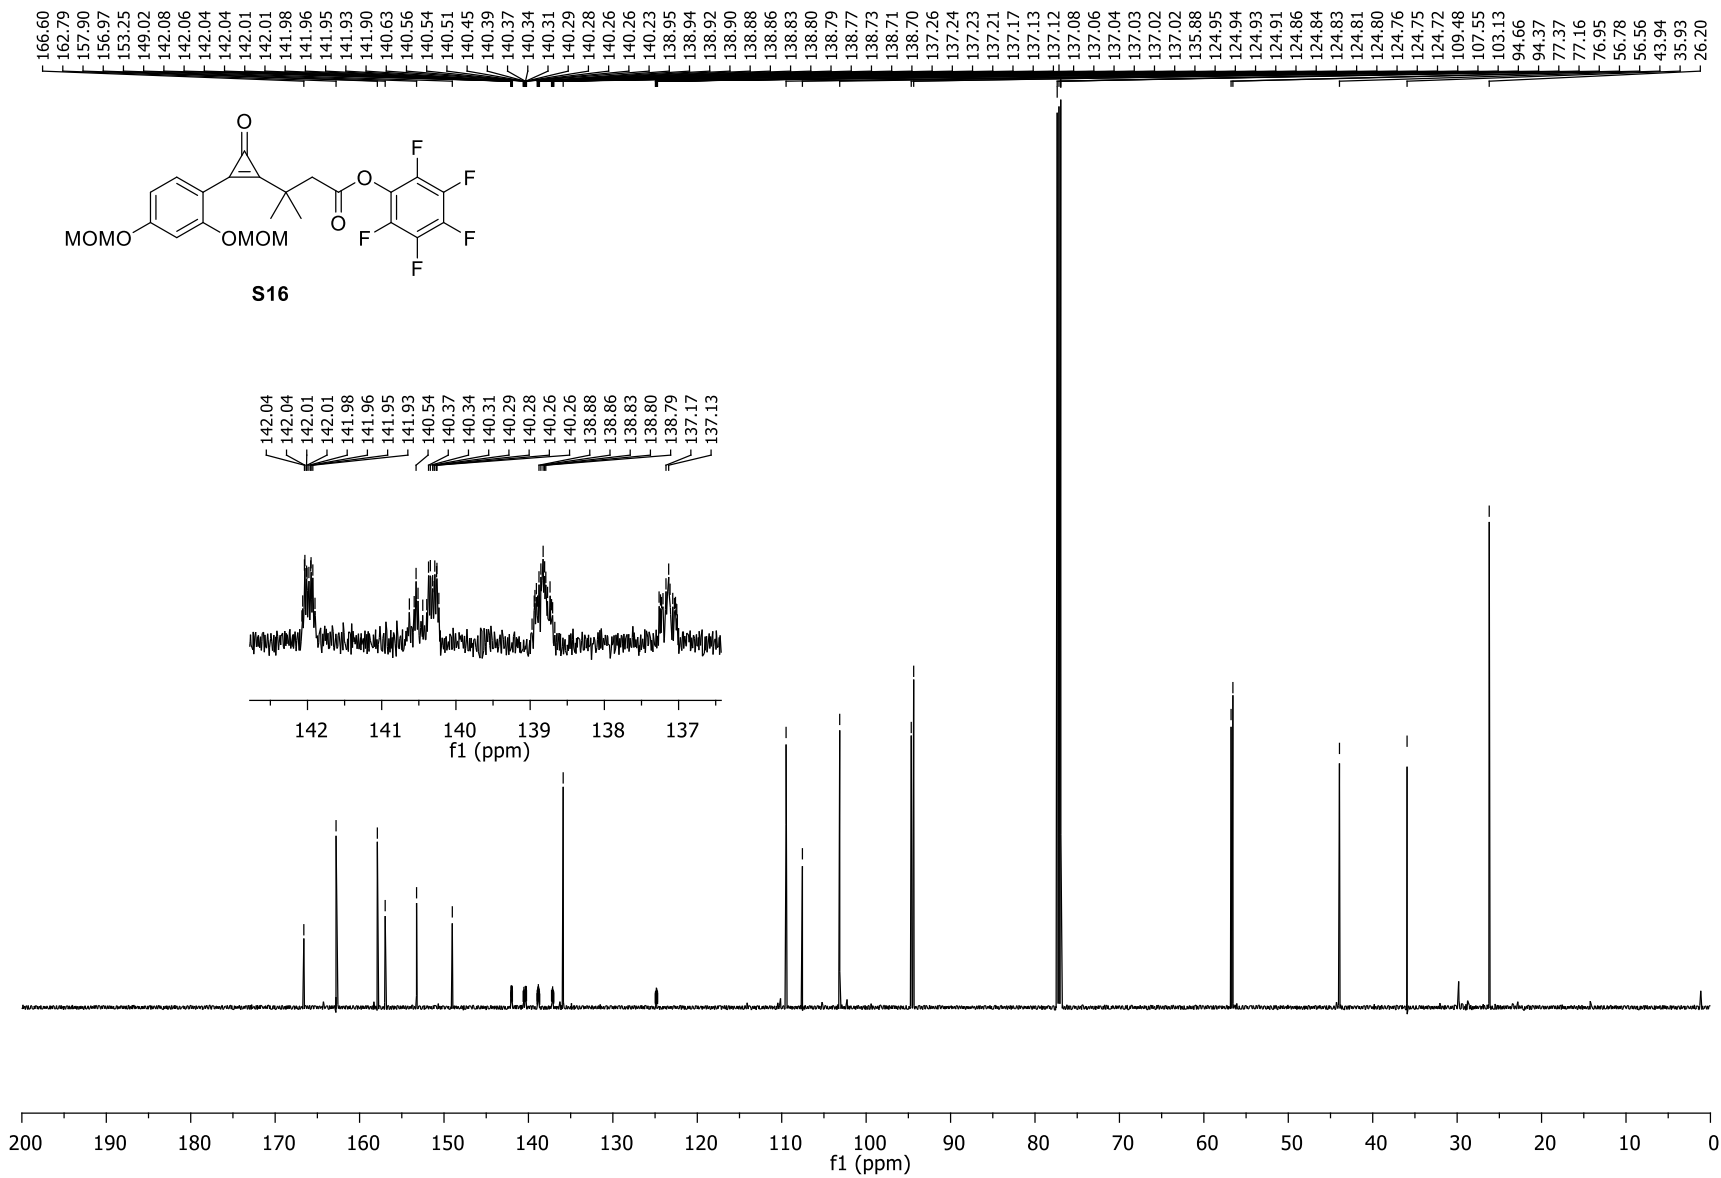

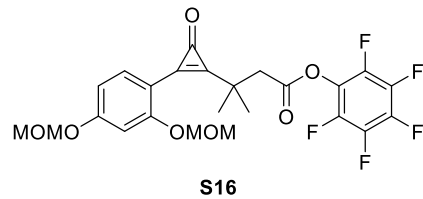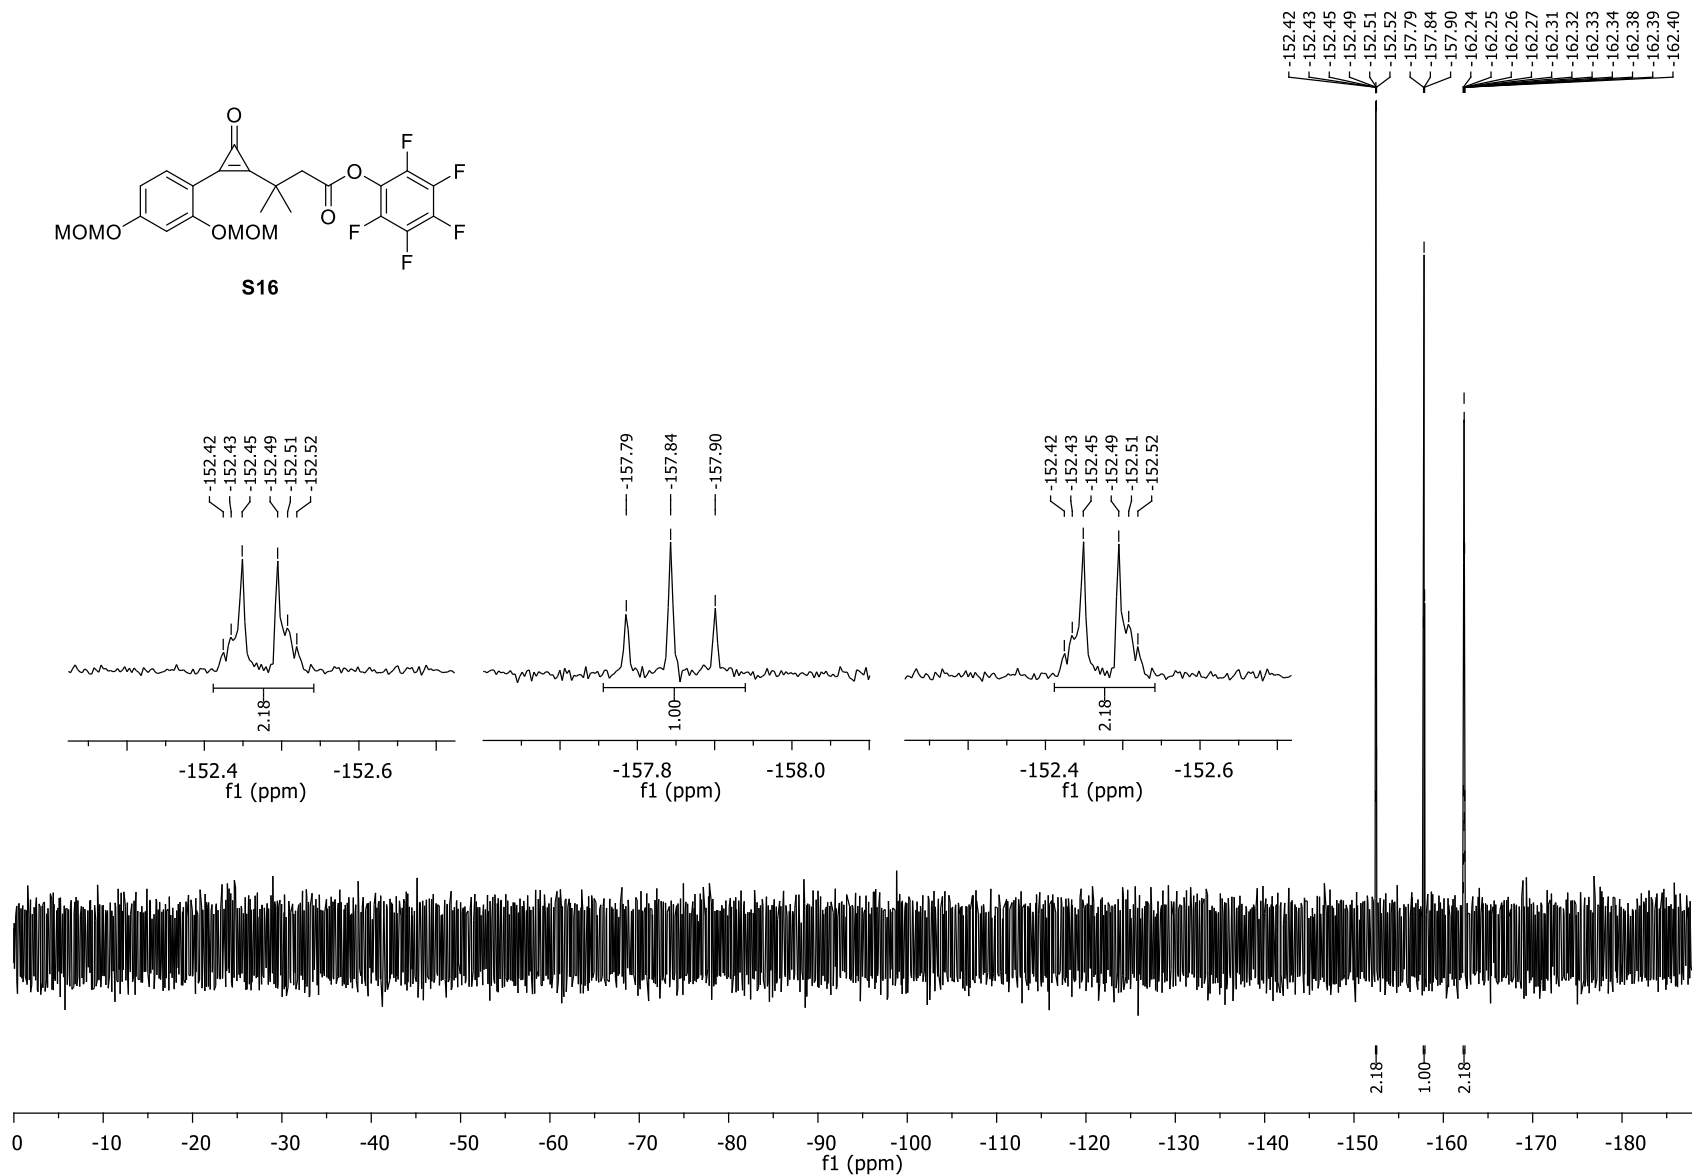

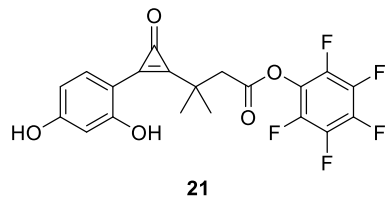

7.51  
7.49

6.48  
6.46

2.09  
1.94  
1.94  
1.94  
1.53

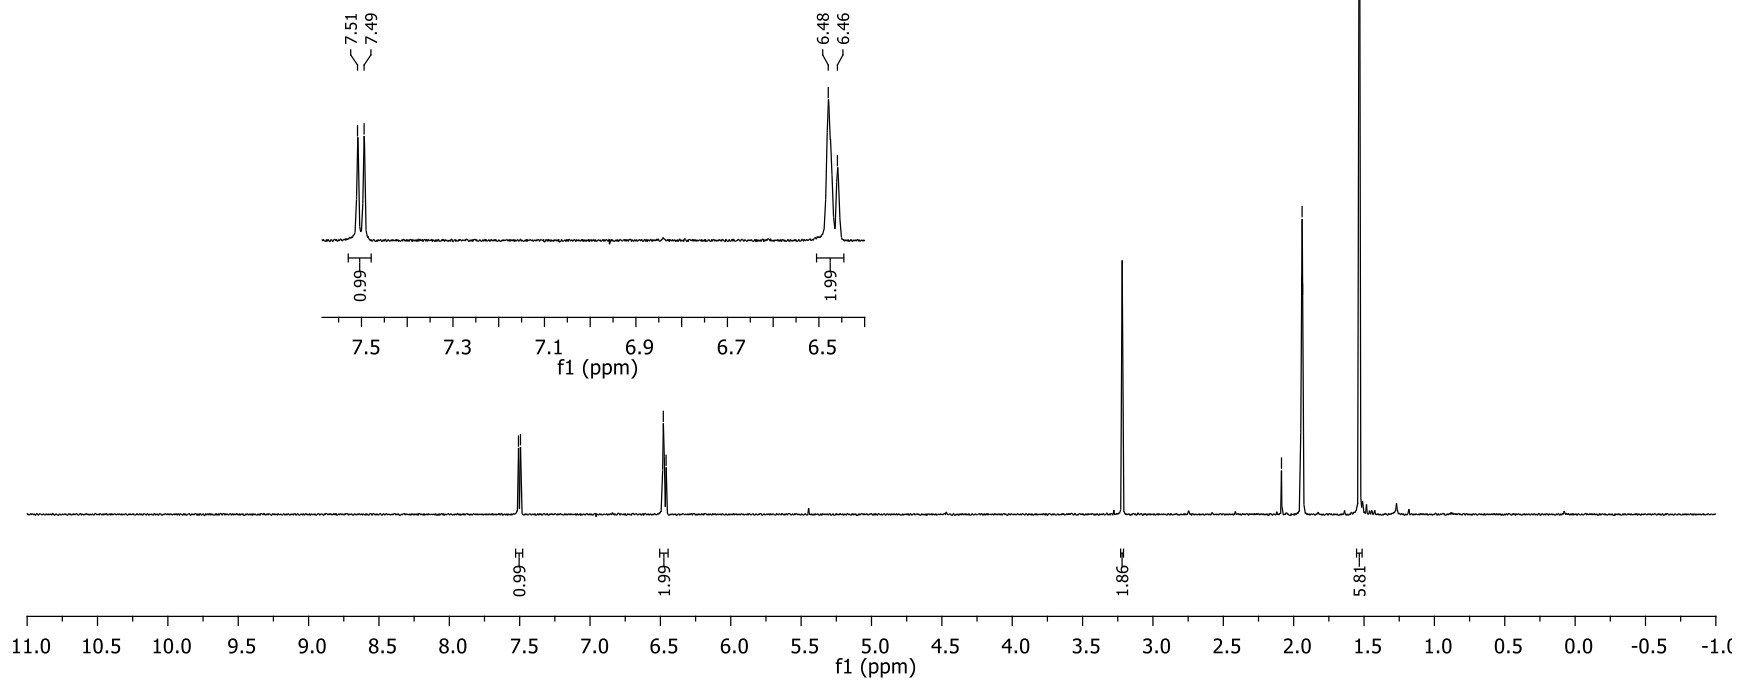

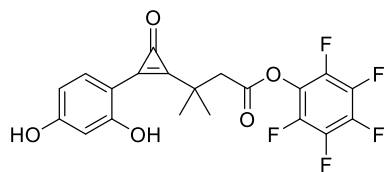

21

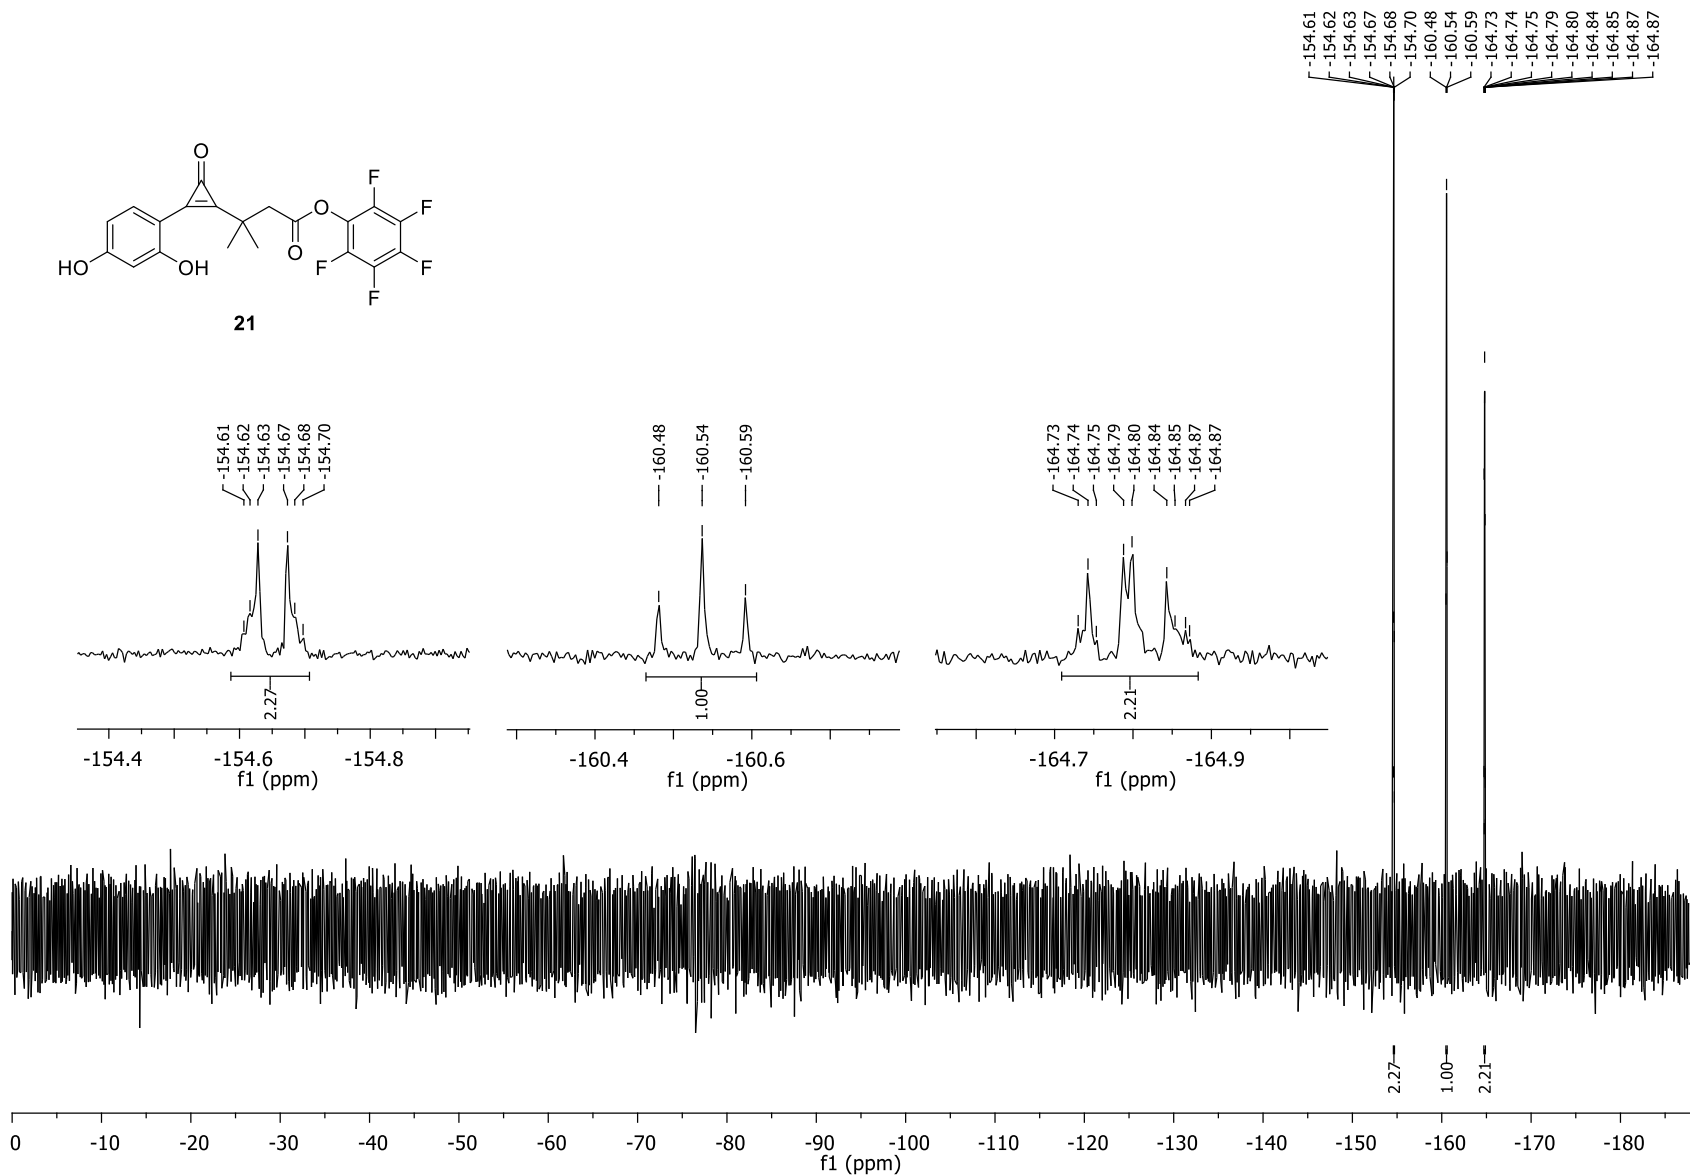

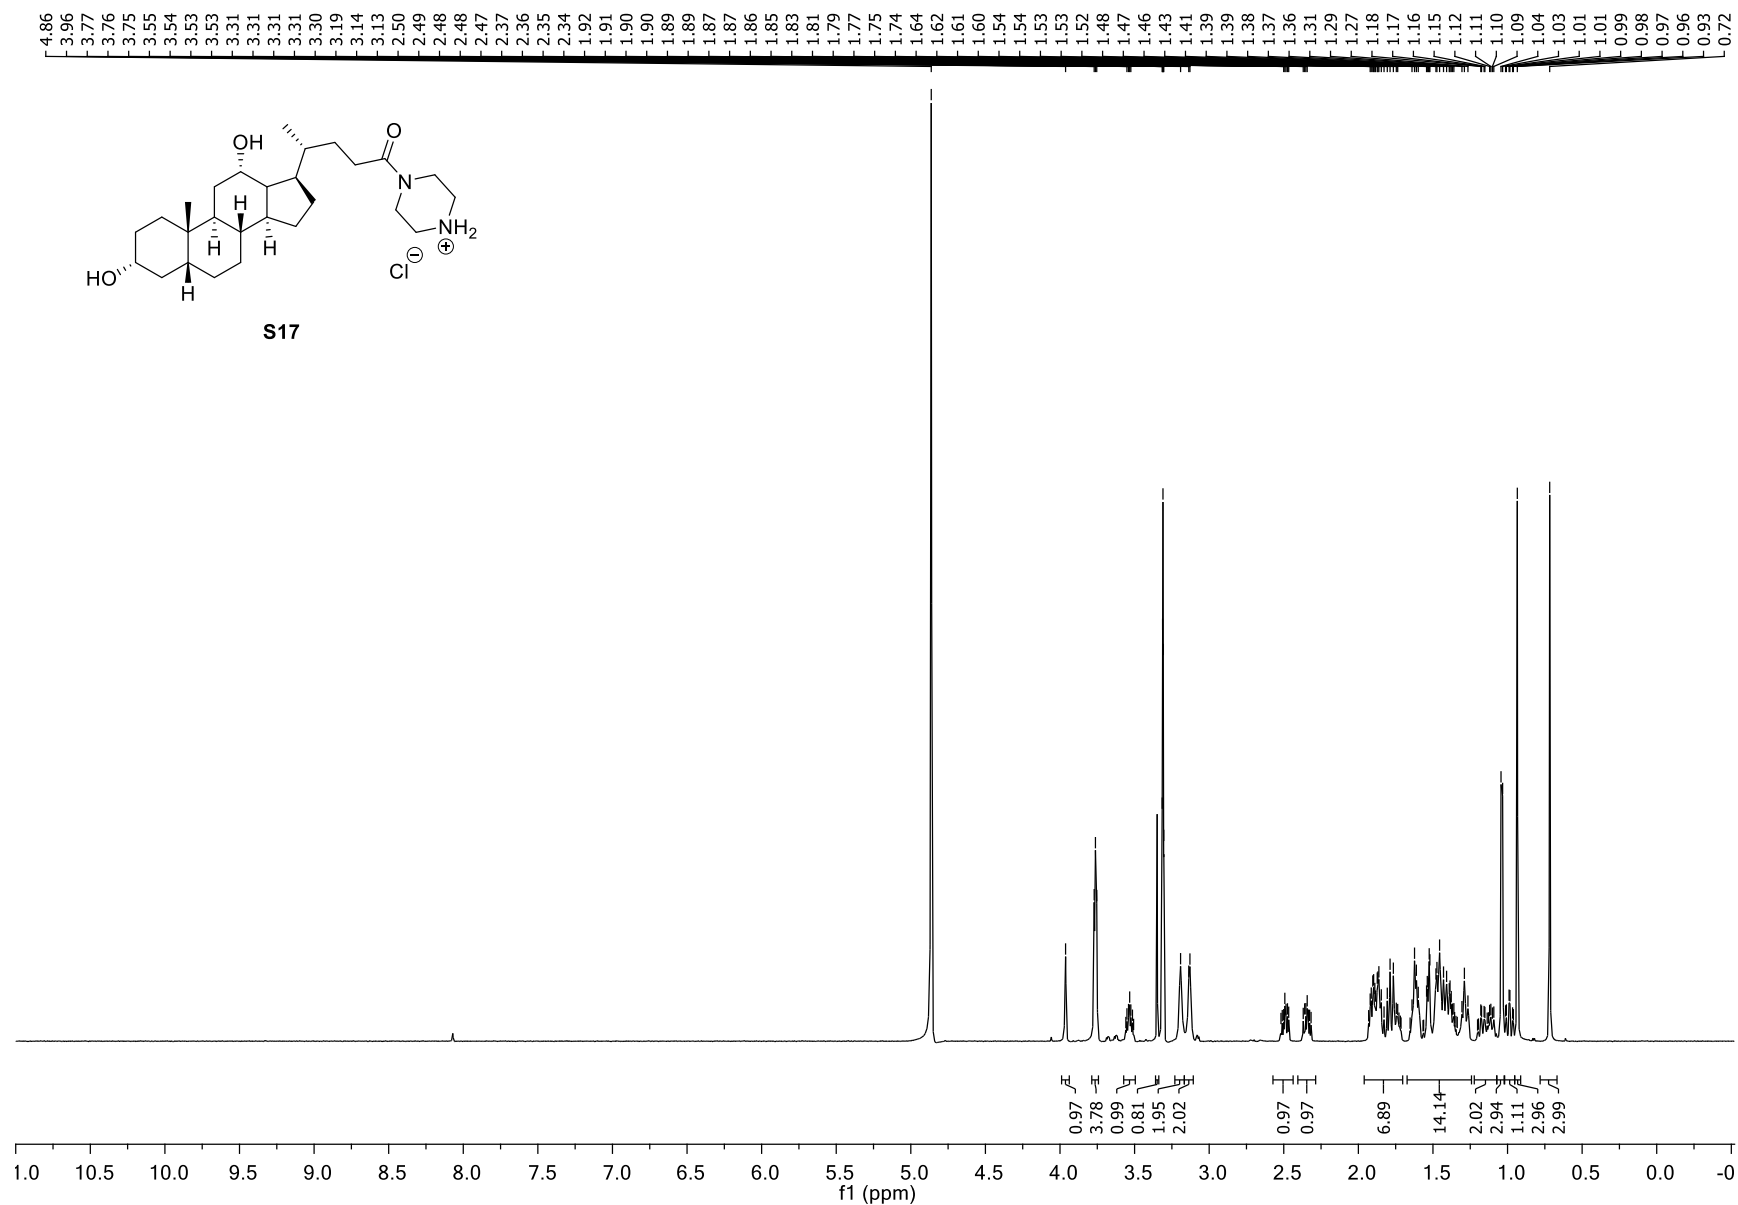

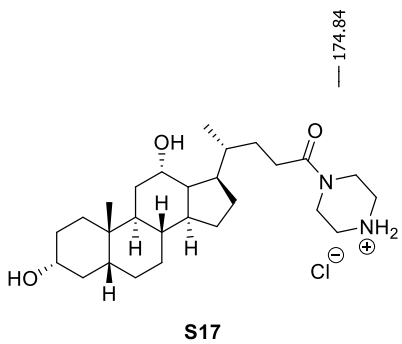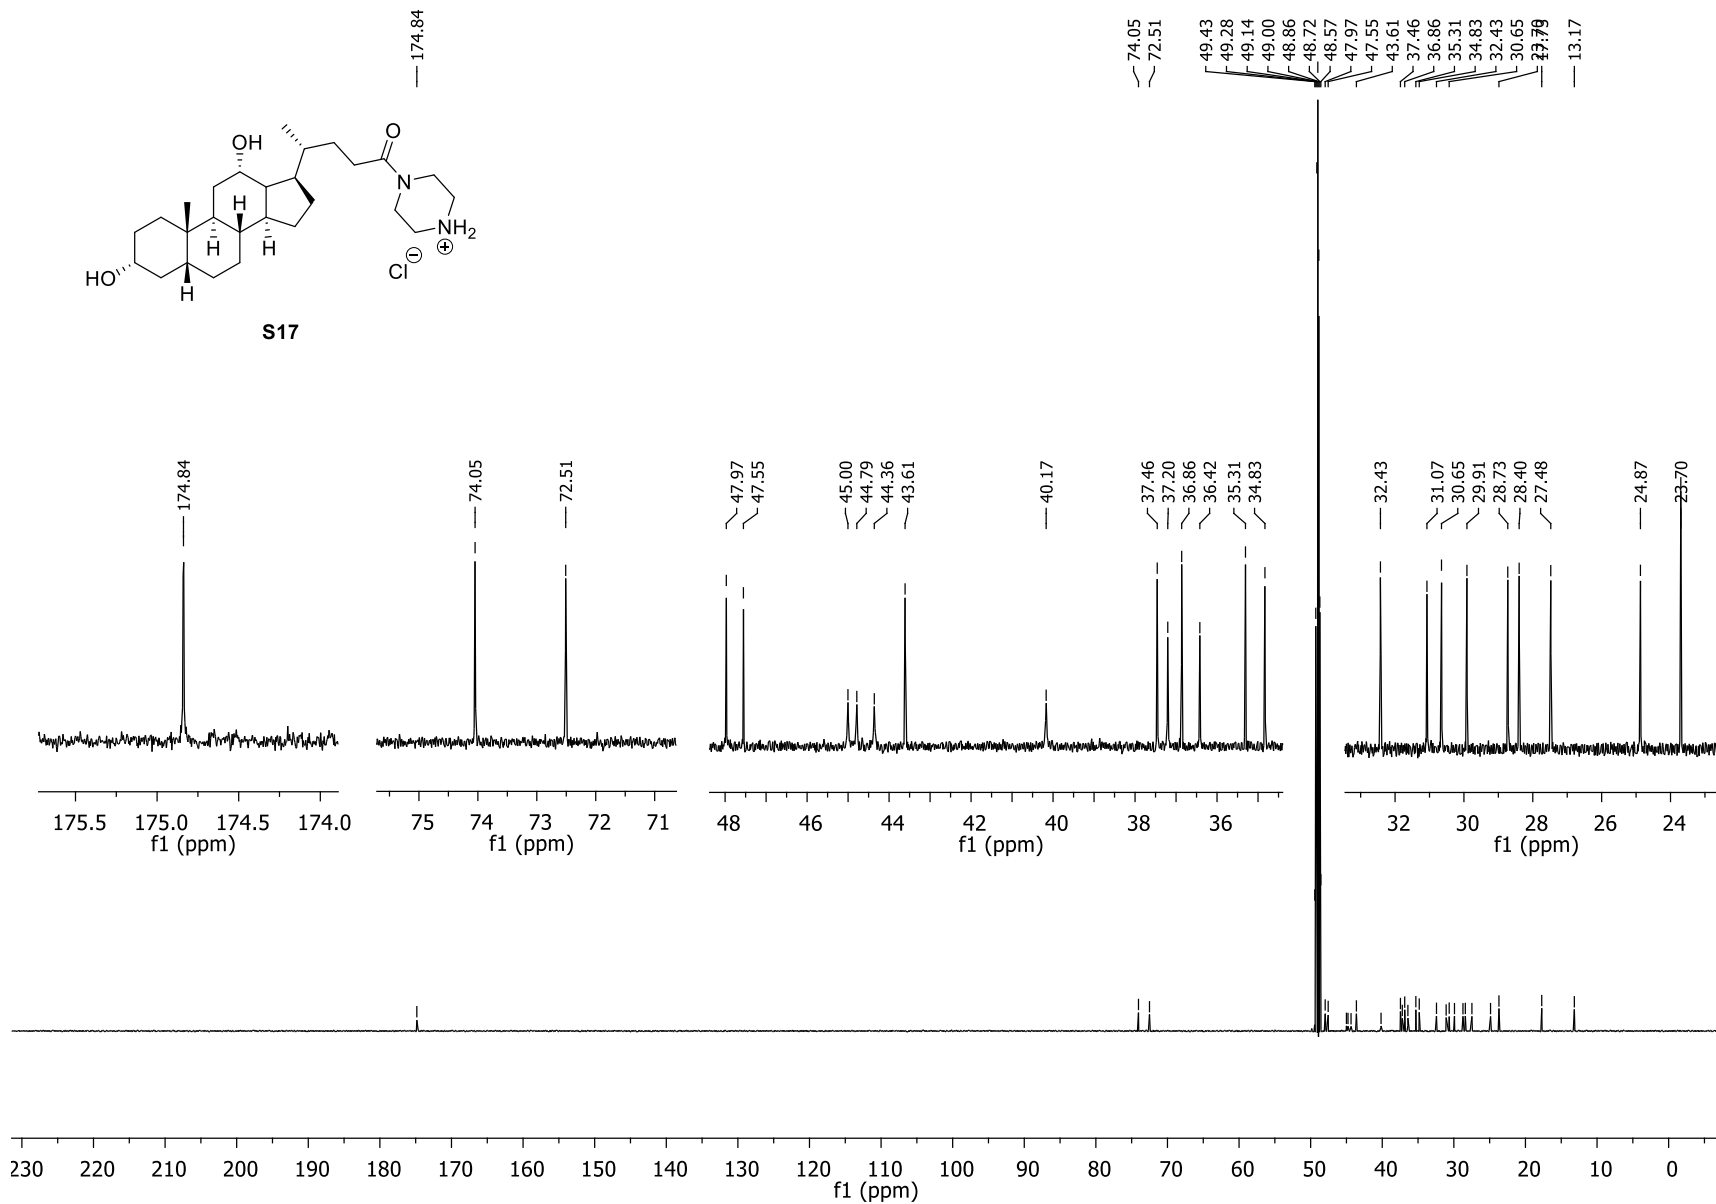



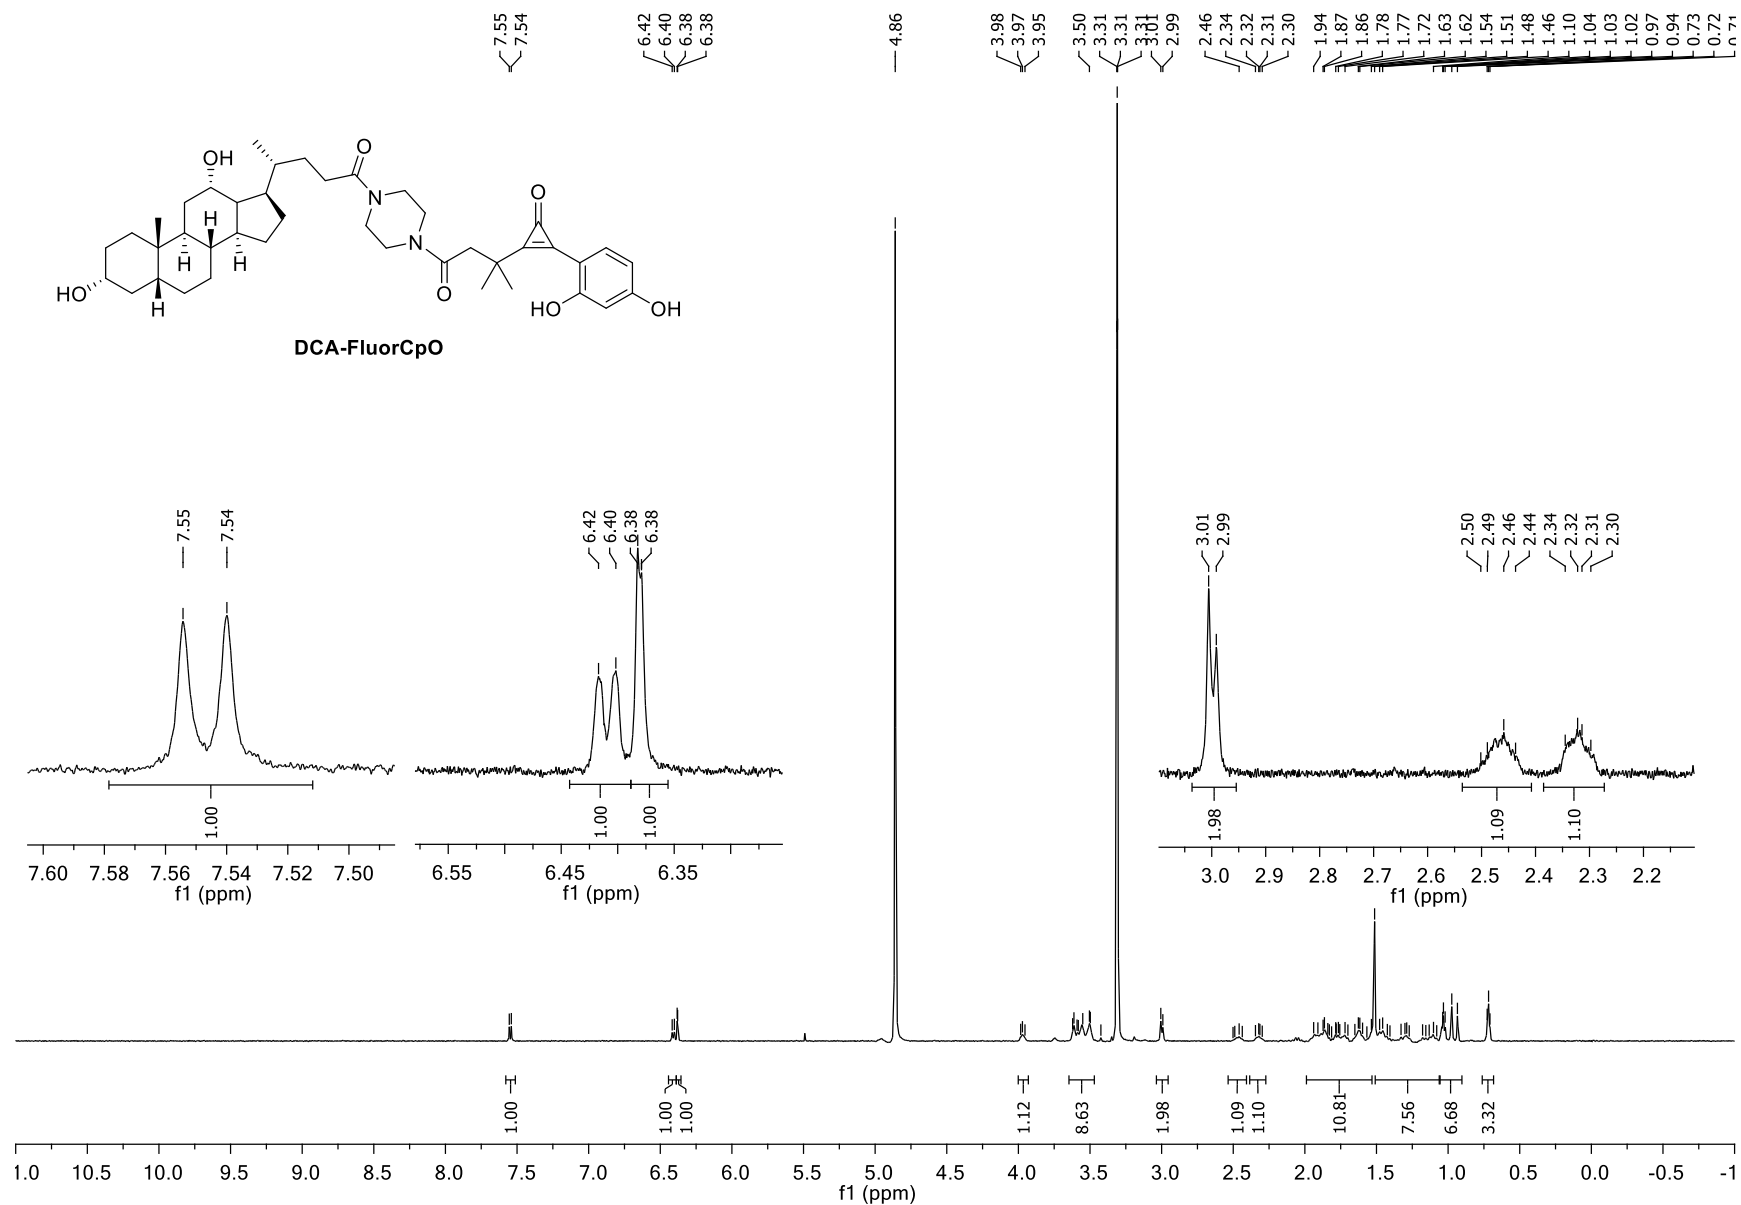

Supplement: NIHMS1826380-supplement-Supplementary_material.pdf [file NIHMS1826380-supplement-Supplementary_material.pdf]
